# Supplementary material for: Catalogue of Pests and Pathogens of Trees on the Island of Ireland
Source: Preprints.org preprint supplement (doi:10.20944/preprints202005.0168.v1), 2020-05-10
Supplement: Supplementary file 1 [file supplementary]

## Sheet: Data
Name	Synonyms/common name	Species authority	Kingdom	Phylum	Subphylum	Class	Subclass	Order	Suborder	Family	Subfamily	Genus	Affected host of the pest record from Ireland	Britain - year of first recoprd (Peace 1962; Freer-Smith et al 2015)	Island of Ireland - year of first record	Native status	References	Reliability (ISPM08)	EPPO/EC	EPPO code		Dept lands report/Forest service report/Forest and Wildlife service reports etc.	Report of minister for lands on forestry 1938-1943	Report of minister for lands on forestry 1943-1950	Dept lands report/Forest service report/Forest and Wildlife service reports etc.	Record of agricultural research 1952	Dept lands report/Forest service report/Forest and Wildlife service reports etc.	Record of agricultural research 1956	Record of agricultural research 1957	Dept lands report/Forest service report/Forest and Wildlife service reports etc.	Record of agricultural research 1958 part 2	Dept lands report/Forest service report/Forest and Wildlife service reports etc.	Record of agricultural research 1959 part 2	Dept lands report/Forest service report/Forest and Wildlife service reports etc.	Record of agricultural research 1960 part 2	Dept lands report/Forest service report/Forest and Wildlife service reports etc.	Record of agricultural research 1961 part 2	Report of minister for lands on forestry 1961	Dept lands report/Forest service report/Forest and Wildlife service reports etc.	Record of agricultural research 1962 part 2	Report of minister for lands on forestry 1962	Annual progress report on research and technical work 1963	Ministry of agriculture NI 1963	Report of minister for lands on forestry 1963	Dept lands report/Forest service report/Forest and Wildlife service reports etc.	Annual progress report on research and technical work 1964	Report of minister for lands on forestry 1964-1966	Annual progress report on research and technical work 1965	Annual progress report on research and technical work 1966
Region ->																						IE	IE	IE	IE	NI	IE	NI	NI	IE	NI	IE	NI	IE	NI	IE	NI	IE	IE	NI	IE	NI	NI	IE	IE	NI	IE	NI	NI
Relevant years ->																						1933 - 1938	1938-1943	1943-1950	1950-1953	1952	1953-1957	1956	1957	1957	1958	1958	1959	1959	1960	1960	1961	1961	1961-1962	1962	1962	1963	1963	1963	1963	1964	1964-1966	1965	1966
?Acute oak decline													Quercus	2009	Absent		See government reports
?Adelges sp.						Insecta (1INSEC)							Larix europea		1969		See government reports
?Ash disease?															1981		See government reports
?Bacterial canker													Populus		1962		See government reports																							Recorded
?Blastobasis sp.						Insecta (1INSEC)									2002		See government reports
?Cerambycidae sp.						Insecta (1INSEC)									2008		Uk PZ report
?Ceratocystis sp.			Fungi (1FUNGK)										Picea		1963		Ward et al 1993																									Recorded
?Cinara sp.						Insecta (1INSEC)									2000		See government reports
?Coryneum sp.			Fungi (1FUNGK)										Juniperus		1963		See government reports																									Recorded
?Cylindrocarpon sp.			Fungi (1FUNGK)										Picea sitchensis		1965		See government reports																															Recorded
?Cytospora sp.			Fungi (1FUNGK)										Populus		1962		See government reports																							Recorded
?Damping off													Pinus, Picea		1966		See government reports					Recorded														Recorded									Recorded
?Diaporthe sp.			Fungi (1FUNGK)												2001		See government reports
?Epinotia sp.						Insecta (1INSEC)									1984		See government reports
?Fungus			Fungi (1FUNGK)										Picea		1964		See government reports																														Recorded
?Fusarium sp.			Fungi (1FUNGK)										Betula, Populus		1967		See government reports
?Fusicladium sp.			Fungi (1FUNGK)										Salix		1972		See government reports
?Ganoderma sp.			Fungi (1FUNGK)												2002		See government reports
?Group dying of conifers															1956		See government reports											Recorded
?Lachnellula sp.			Fungi (1FUNGK)										Pinus		1976		See government reports
?Lepidoderma sp.			Fungi (1FUNGK)										Acer		1987		See government reports
?Lophodermium sp.			Fungi (1FUNGK)										Picea		1964		See government reports																													Recorded
?Marssonina sp.			Fungi (1FUNGK)												2002		Ward et al 1993
?Mildew seedlings													Quercus		1943		See government reports							Recorded
?Nectria sp.			Fungi (1FUNGK)										Fagus, Fraxinus, Picea abies, Picea sitchensis		1958		See government reports; A. Hamilton pers. Comm. 2017														Recorded				Recorded
?Needle blast															1950		See government reports								Recorded
?Needle cast													Pinus, Picea		1963		See government reports																												Recorded
?Otiorhynchus sp.						Insecta (1INSEC)									2002		See government reports
?Phoma sp.			Fungi (1FUNGK)												2001		See government reports
?Phomopsis sp.	Thonopsis		Fungi (1FUNGK)										P{seudotsuga menziesii		1963		See government reports																											Recorded
?Phyllobius sp.						Insecta (1INSEC)									2002		See government reports
?Phytophthora sp.			Chromista (1CHROK)										Cotoneaster, Cedrus, Embothrium, Prunus		1967		See government reports
?Pleurococcus sp.			Fungi (1FUNGK)												2001		See government reports
?Powdery mildew													Acer		1950		See government reports								Recorded
?Pythium sp.	damping off		Chromista (1CHROK)										Larix, Pinus contorta		1966		See government reports
?Rhagium sp.						Insecta (1INSEC)									2001		See government reports
?Rhinocladiella sp.			Fungi (1FUNGK)										Pinus		1975		See government reports
?Rhizophagus sp.						Insecta (1INSEC)									2002		See government reports
?Rosellinia sp.			Fungi (1FUNGK)												1938		See government reports						Recorded
?Rust													Pinus		1963		See government reports																												Recorded
?Scots pine dieback													Pinus		1987		See government reports
?Seridium sp.	Coryneum sp.		Fungi (1FUNGK)										Juniperus		1963		See government reports																									Recorded
?Sporobolomyces sp.			Fungi (1FUNGK)										Sorbus		1946		See government reports
?Strophosoma sp.						Insecta (1INSEC)							Picea		1970		See government reports
?Unknown beetle						Insecta (1INSEC)									2012 (interception)		EUROPHYT 2012, 2013
?Unknown beetle						Insecta (1INSEC)									2014 (interception)		EUROPHYT 2014
?Unknown beetle						Insecta (1INSEC)									2007 (interception)		EUROPHYT 2007
?Unknown beetle						Insecta (1INSEC)									2016 (interception)		EUROPHYT 2016
?Unknown fly						Insecta (1INSEC)							Dicksonia		2012 (interception)		EUROPHYT 2012
Adelges abietis			Animalia (1ANIMK)	Arthropoda (1ARTHP)	Hexapoda (1HEXAQ)	Insecta (1INSEC)		Hemiptera (1HEMIO)	Sternorrhyncha (1STERR)	Adelgidae (1ADLGF)		Sacchiphantes (1SACHG)	Picea	1911	1907	Native to parts of Europe (Kloet and Hincks 1945); Native to Ireland (Quirke 1947)	Carpenter 1908 EB RDS; Quirke 1947; NBN atlas	2		ADLGAB
Adelges cooleyi	Gilletteella cooleyi		Animalia (1ANIMK)	Arthropoda (1ARTHP)	Hexapoda (1HEXAQ)	Insecta (1INSEC)		Hemiptera (1HEMIO)	Sternorrhyncha (1STERR)	Adelgidae (1ADLGF)		Gilletteella (1GILLG)	Pseudotsuga	1913	1933	Native to parts of Europe (Kloet and Hincks 1945); Native to Ireland (Quirke 1947)	See government reports; Browne 1968	2		ADLGCO		Recorded		Recorded
Adelges laricis	Chermes laricis		Animalia (1ANIMK)	Arthropoda (1ARTHP)	Hexapoda (1HEXAQ)	Insecta (1INSEC)		Hemiptera (1HEMIO)	Sternorrhyncha (1STERR)	Adelgidae (1ADLGF)		Adelges (1ADLGG)	Larix	1906	1940	Native to parts of Europe (Kloet and Hincks 1945)	Elwes and Henry 1906; Carter et al. 1987; Burdon 1908 as cited in Carter 1971	2		ADLGLA
Adelges nusslini			Animalia (1ANIMK)	Arthropoda (1ARTHP)	Hexapoda (1HEXAQ)	Insecta (1INSEC)		Hemiptera (1HEMIO)	Sternorrhyncha (1STERR)	Adelgidae (1ADLGF)				1973	1938	Native Ireland (Quirke 1947); Exotic to Europe (CABI)	See government reports; CABI	2					Recorded	Recorded
Adelges strobilobius			Animalia (1ANIMK)	Arthropoda (1ARTHP)	Hexapoda (1HEXAQ)	Insecta (1INSEC)		Hemiptera (1HEMIO)	Sternorrhyncha (1STERR)	Adelgidae (1ADLGF)		Adelges (1ADLGG)		1919	1947	Native Ireland (Quirke 1947)	Quirke 1947; Speyer 1919 Ann Appl Biol 6 as cited in Varty 1956	2		ADLGLA
Agrilus anxius		Gory	Animalia (1ANIMK)	Arthropoda (1ARTHP)	Hexapoda (1HEXAQ)	Insecta (1INSEC)		Coleoptera (1COLEO)		Buprestidae (1BUPRF)		Agrilus (1AGRLG)		Absent	Absent
Agrilus bilineatus			Animalia (1ANIMK)	Arthropoda (1ARTHP)	Hexapoda (1HEXAQ)	Insecta (1INSEC)		Coleoptera (1COLEO)		Buprestidae (1BUPRF)		Agrilus (1AGRLG)		Absent	Absent
Agrilus planipennis		Fairmaire	Animalia (1ANIMK)	Arthropoda (1ARTHP)	Hexapoda (1HEXAQ)	Insecta (1INSEC)		Coleoptera (1COLEO)		Buprestidae (1BUPRF)		Agrilus (1AGRLG)		Absent	Absent
Allantophomopsiella pseudotsugae	Phomopsis pseudotsugae , Phacidium coniferarum	(M. Wilson) Crous	Fungi (1FUNGK)							Phacidiaceae			Pseudotsuga, Larix	1920	1957	Native to parts of Europe (Santini et al. 2013)	Ward et al 1993; Moore 1959; Hahn 1957	2																											Recorded
Amauronematus hedstroemi	Amauronematus tillbergi		Animalia (1ANIMK)							Tenthredinidae			Salix	1958	1968		Browne 1968, brc.ac.uk; Liston et al. 2014 Biodiv Data J	2
Amauronematus histrio			Animalia (1ANIMK)							Tenthredinidae			Salix	1945	1968	Native to parts of Europe (Kloet and Hincks 1945)	Browne 1968, kloet and hincks 1945; Liston et al. 2014 Biodiv Data J	2
Amauronematus viduatus			Animalia (1ANIMK)							Tenthredinidae			Salix	1945	1968	Native to parts of Europe (Kloet and Hincks 1945)	Browne 1968, kloet and hincks 1945; Liston et al. 2014 Biodiv Data J	2
Andriscus quercuscalis			Animalia (1ANIMK)							Cynipidae				1909	1991		Reynolds and Reynolds INJ 2008; NBN Atlas	1
Anisogramma virgultorum			Fungi (1FUNGK)	Ascomycota (1ASCOP)	Pezizomycotina (1PEZIQ)	Sordariomycetes (1SORDC)	Sordariomycetidae (1SRDAL)	Diaporthales (1DIAPO)		Valsaceae (1VALSF)		Anisogramma (1ANIGG)	Betula	1999	1982		FRDBI	4		ANIGVI
Anoplophora chinensis		(Thomson)	Animalia (1ANIMK)	Arthropoda (1ARTHP)	Hexapoda (1HEXAQ)	Insecta (1INSEC)		Coleoptera (1COLEO)		Cerambycidae (1CERAF)		Anoplophora (1ANOLG)		2005 (intercepted)	Absent		EUROPHYT 2016		Priority	ANOLCN
Anoplophora glabripennis		(Motschulsky)	Animalia (1ANIMK)	Arthropoda (1ARTHP)	Hexapoda (1HEXAQ)	Insecta (1INSEC)		Coleoptera (1COLEO)		Cerambycidae (1CERAF)		Anoplophora (1ANOLG)	Acer pseudoplanatus	2010	ABsent		EPPO 2020b		Priority	ANOLGL
Anoplus plantaris			Animalia (1ANIMK)	Arthropoda (1ARTHP)	Hexapoda (1HEXAQ)	Insecta (1INSEC)		Coleoptera (1COLEO)		Curculionidae (1CURCF)			Betula	1945	1900	Native to parts of Europe (Kloet and Hincks 1945)	Johnson and Halbert 1900; kloet and hincks 1945	2
Anoplus roboris			Animalia (1ANIMK)	Arthropoda (1ARTHP)	Hexapoda (1HEXAQ)	Insecta (1INSEC)		Coleoptera (1COLEO)		Curculionidae (1CURCF)			Quercus	1882	1900	Native to parts of Europe (Kloet and Hincks 1945)	Johnson and Halbert 1900; NBN Atlas	2
Anthostomella formosa			Fungi (1FUNGK)	Ascomycota (1ASCOP)	Pezizomycotina (1PEZIQ)	Sordariomycetes (1SORDC)	Xylariomycetidae (1XYLAL)	Xylariales (1XYLAO)		Xylariaceae (1XYLAF)		Anthostomella (1ATSMG)	Pinus	1971	absent		Jones and Baker 2007			ATSMFO
Anthostomella pedemontana			Fungi (1FUNGK)	Ascomycota (1ASCOP)	Pezizomycotina (1PEZIQ)	Sordariomycetes (1SORDC)	Xylariomycetidae (1XYLAL)	Xylariales (1XYLAO)		Xylariaceae (1XYLAF)		Anthostomella (1ATSMG)	Pinus	1975	absent		Jones and Baker 2007
Anthostomella sabinianae			Fungi (1FUNGK)	Ascomycota (1ASCOP)	Pezizomycotina (1PEZIQ)	Sordariomycetes (1SORDC)	Xylariomycetidae (1XYLAL)	Xylariales (1XYLAO)		Xylariaceae (1XYLAF)		Anthostomella (1ATSMG)	Pinus	1976	absent		Jones and Baker 2007
Apethymus braccatus			Animalia (1ANIMK)	Arthropoda (1ARTHP)	Hexapoda (1HEXAQ)	Insecta (1INSEC)		Hymenoptera (1HYMEO)		Tenthredinidae (1TENTF)			Quercus	1945	1968	Native to parts of Europe (Kloet and Hincks 1945)	Browne 1968, kloet and hincks 1945	2
Aphelia viburnana	tortrix viburniana		Animalia (1ANIMK)	Arthropoda (1ARTHP)	Hexapoda (1HEXAQ)	Insecta (1INSEC)		Lepidoptera (1LEPIO)		Tortricidae (1TORTF)		Aphelia (1APELG)		1834	1961		See government reports; NBN Atlas	2		APELVI																		Recorded
Apiognomonia errabunda	gloeosporium tiliae		Fungi (1FUNGK)	Ascomycota (1ASCOP)	Pezizomycotina (1PEZIQ)	Sordariomycetes (1SORDC)	Sordariomycetidae (1SRDAL)	Diaporthales (1DIAPO)		Valsaceae (1VALSF)		Apiognomonia (1APIGG)	Tilia, Quercus	1865	1965		See government reports; FRDBI; PlantWise	2		GNOMEB																												Recorded
Argyresthia cupressella			Animalia (1ANIMK)	Arthropoda (1ARTHP)	Hexapoda (1HEXAQ)	Insecta (1INSEC)		Lepidoptera (1LEPIO)		Yponomeutidae (1YPONF)		Argyresthia (1ARGYG)		1998	2003		Bond and O'Connor 2012; NBN Atlas	1		ARGYCU
Argyresthia laevigatella	Argyresthia atmoriella		Animalia (1ANIMK)	Arthropoda (1ARTHP)	Hexapoda (1HEXAQ)	Insecta (1INSEC)		Lepidoptera (1LEPIO)		Yponomeutidae (1YPONF)		Argyresthia (1ARGYG)	Larix	1922	1919	Native to parts of Europe (Kloet and Hincks 1945)	Forestry Comission 1920; Browne 1968, brc.ac.uk	2		ARGYLA
Armillaria mellea		(Vahl) P. Kumm.,	Fungi (1FUNGK)	Basidiomycota (1BASIP)		Agaricomycotina (1BASIC)	Agaricomycetes (1AGARL)	Agaricales (1AGARO)		Physalacriaceae (1PHSLF)		Armillaria (1ARMLG)	Nothofagus, Betula, Prunus, Tsuga, Larix, Picea, Chamaecyparis, Alnus, Thuja, Fagus, Rhododendron, Lingistrum, Crataegus, Griselinia, Calluna	1797	1843	Native (Ireland)	Muskett and Malone 1980; Quirke 1946; Horgan et al. 2004; See government reports; Ward et al. 1993	2	RNQP	ARMIME			Recorded	Recorded			Recorded			Recorded	Recorded	Recorded	Recorded	Recorded	Recorded	Recorded		Recorded	Recorded	Recorded				Recorded	Recorded	Recorded	Recorded		Recorded
Arnoldiola quercus			Animalia (1ANIMK)	Arthropoda (1ARTHP)	Hexapoda (1HEXAQ)	Insecta (1INSEC)		Diptera (1DIPTO)		Cecidomyiidae (1CECIF)		Arnoldiola (1ARNLG)		1945	2010	Native to parts of Europe (Kloet and Hincks 1945)	kloet and hincks 1945; Clark, 2010	1		ARNLQU
Aureobasidium pullulans	Pullularia pullulans		Fungi (1FUNGK)	Ascomycota (1ASCOP)	Pezizomycotina (1PEZIQ)	Dothideomycetes (1DOTHC)	Dothideomycetidae (1DTHDL)	Dothideales (1DOTHO)		Saccotheciaceae (1SACTF)		Aureobasidium (1AUREG)	Pinus contorta	1944	1968		See government reports; de Brit Forest research review 1964-1970	2		AUREPU
Barypithes pellucidus			Animalia (1ANIMK)	Arthropoda (1ARTHP)	Hexapoda (1HEXAQ)	Insecta (1INSEC)		Coleoptera (1COLEO)		Curculionidae (1CURCF)				1855	1930	Native to parts of Europe (Kloet and Hincks 1945)	Bullock 1930 as cited in Morris 1968; NBN Atlas	2
Bibio marci	St Mark's fly		Animalia (1ANIMK)	Arthropoda (1ARTHP)	Hexapoda (1HEXAQ)	Insecta (1INSEC)		Diptera (1DIPTO)		Bibionidae (1BIBIF)		Bibio (1BIBIG)		1898	1833	Native to parts of Europe (Kloet and Hincks 1945)	Halliday 1833 as cited in Darcy Et al 1987; NBN Atlas	2		BIBIMA			Recorded
Blastobasis adustella	Blastobasis lignea		Animalia (1ANIMK)	Arthropoda (1ARTHP)	Hexapoda (1HEXAQ)	Insecta (1INSEC)		Lepidoptera (1LEPIO)	Glossata	Blastobasidae				1900	1911		Beirne 1938; NBN Atlas	2
Blumeriella jaapii			Fungi (1FUNGK)	Ascomycota (1ASCOP)	Pezizomycotina (1PEZIQ)	Leotiomycetes (1LETOC)		Helotiales (1HELOO)		Dermateaceae (1DERMF)		Blumeriella (1BLUMG)		1960	2001	Non-native to Europe (Santini et al. 2013)	Anon 2003 (EU-forest health survey )	3		BLUMJA
Botrytis cinerea	Botrytis douglasii	Pers.,	Fungi (1FUNGK)	Ascomycota (1ASCOP)	Pezizomycotina (1PEZIQ)	Leotiomycetes (1LETOC)		Helotiales (1HELOO)		Sclerotiniaceae (1SCLEF)		Botrytis (anamorphic genus) (1BOTRG)	Pinus, Sequoia, Larix,	1902	1903		See government reports; Ward et al 1993; Anon 1903 as cited in Elwes and Henry 1909;	2		BOTRCI					Recorded													Recorded	Recorded
Brenneria nigrifluens			Bacteria (1BACTK)	Proteobacteria (1PROBP)		Gammaproteobacteria (1GAMBC)		Enterobacterales (1ENTEO)		Pectobacteriaceae (1PECTF)		Brenneria (1BRNNG)	Aesculus	2012	2016		McEvoy et al. 2016; Denman et al. 2012	1		ERWINI
Brenneria salicis			Bacteria (1BACTK)	Proteobacteria (1PROBP)		Gammaproteobacteria (1GAMBC)		Enterobacterales (1ENTEO)		Pectobacteriaceae (1PECTF)		Brenneria (1BRNNG)		1921	Absent		PlantWise
Bretziella fagacearum		(Bretz) Z.W de Beer, T.A. Duong & M.J. Wingfield	Fungi (1FUNGK)	Ascomycota (1ASCOP)	Pezizomycotina (1PEZIQ)	Sordariomycetes (1SORDC)	Hypocreomycetidae (1HYPRL)	Microascales (1MICRO)		Ceratocystidaceae (1CERKF)		Bretziella (1BREZG)		absent	absent
Bupalus piniaria			Animalia (1ANIMK)	Arthropoda (1ARTHP)	Hexapoda (1HEXAQ)	Insecta (1INSEC)		Lepidoptera (1LEPIO)		Geometridae (1GEOMF)		Bupalus (1BUPAG)	Pinus	1949	1897	Native UK (Bevan 1987)	Moffat 1897; mothsireland.com	3		BUPAPI
Caliroa annulipes			Animalia (1ANIMK)	Arthropoda (1ARTHP)	Hexapoda (1HEXAQ)	Insecta (1INSEC)		Hymenoptera (1HYMEO)		Tenthredinidae (1TENTF)		Caliroa (1KALIG)	Quercus	1914	1968	Native to parts of Europe (Kloet and Hincks 1945)	Browne 1968, brc.ac.uk; Liston et al. 2014 Biodiv Data J	2		ERICAN
Caliroa cerasi			Animalia (1ANIMK)	Arthropoda (1ARTHP)	Hexapoda (1HEXAQ)	Insecta (1INSEC)		Hymenoptera (1HYMEO)		Tenthredinidae (1TENTF)		Caliroa (1KALIG)	Quercus	1871	1968		Browne 1968, brc.ac.uk; Liston et al. 2014 Biodiv Data J	2		ERICLI
Caliroa varipes			Animalia (1ANIMK)	Arthropoda (1ARTHP)	Hexapoda (1HEXAQ)	Insecta (1INSEC)		Hymenoptera (1HYMEO)		Tenthredinidae (1TENTF)		Caliroa (1KALIG)		2014	2014		Liston et al. 2014 Biodiv Data J	2
Calonectria morganii	Cylindrocladium scoparium	Crous, Alfenas & M.J. Wingf.	Fungi (1FUNGK)	Ascomycota (1ASCOP)	Pezizomycotina (1PEZIQ)	Sordariomycetes (1SORDC)	Hypocreomycetidae (1HYPRL)	Hypocreales (1HYPRO)		Nectriaceae (1NECTF)		Calonectria (1CALOG)	Abies	1955	1986		See government reports	2		CALOCY
Calonectria pyrochroa			Fungi (1FUNGK)	Ascomycota (1ASCOP)	Pezizomycotina (1PEZIQ)	Sordariomycetes (1SORDC)	Hypocreomycetidae (1HYPRL)	Hypocreales (1HYPRO)		Nectriaceae (1NECTF)		Calonectria (1CALOG)	Laurus	1994	absent		Jones and Baker 2007			CALOPY
Cameraria ohridella			Animalia (1ANIMK)	Arthropoda (1ARTHP)	Hexapoda (1HEXAQ)	Insecta (1INSEC)		Lepidoptera (1LEPIO)		Gracillariidae (1GRACF)		Cameraria (1CAMEG)	Aesculus	2002	2013	Non-native to Europe	MothsIreland 2020; See governemnt reports	1		LITHOD
Candidatus Phytoplasma fragariae			Bacteria (1BACTK)										Corylus	2015	Absent		EPPO 2020b
Candidatus phytoplasma ulmi			Bacteria (1BACTK)										Ulmus	2014	absent		EPPO 2020b
Caradrina clavipalpis	Caradrina quadripuncta		Animalia (1ANIMK)	Arthropoda (1ARTHP)	Hexapoda (1HEXAQ)	Insecta (1INSEC)		Lepidoptera (1LEPIO)		Noctuidae (1NOCTF)		Caradrina (1CRADG)	Salix	1850	1905	Native to parts of Europe (Kloet and Hincks 1945)	Carpenter 1905 EP RDS; NBN atlas	2		ELPHCL
Cephalcia lariciphila			Animalia (1ANIMK)	Arthropoda (1ARTHP)	Hexapoda (1HEXAQ)	Insecta (1INSEC)		Hymenoptera (1HYMEO)		Pamphiliidae (1PAMPF)		Cephalcia (1CEPCG)	Larix	1953	Absent		EPPO 2020b; Speigh 1985		Quarantine	CEPCAL
Ceramica pisi			Animalia (1ANIMK)	Arthropoda (1ARTHP)	Hexapoda (1HEXAQ)	Insecta (1INSEC)		Lepidoptera (1LEPIO)		Noctuidae (1NOCTF)		Ceramica (1CRMCG)	Picea sitchensis	1800	1943	Native to parts of Europe (Kloet and Hincks 1945)	O'Farrell 1947; Baynes 1964; NBN Atlas	2		POLIPI																		Recorded
Ceratocystis fimbriata			Fungi (1FUNGK)	Ascomycota (1ASCOP)	Pezizomycotina (1PEZIQ)	Sordariomycetes (1SORDC)	Hypocreomycetidae (1HYPRL)	Microascales (1MICRO)		Ceratocystidaceae (1CERKF)		Ceratocystis (1CERAG)		1983	Absent		CMI distribtions 1983; FRDBI			CERAFI
Ceratocystis laricicola		Redfern & Minter (1987)	Fungi (1FUNGK)	Ascomycota (1ASCOP)	Pezizomycotina (1PEZIQ)	Sordariomycetes (1SORDC)	Hypocreomycetidae (1HYPRL)	Microascales (1MICRO)		Ceratocystidaceae (1CERKF)		Endoconidiophora (1ENDNG)		1937	Absent	Cryptic EU (Santini et al. 2013)	Santini et al. 2013; Jones and Baker 2007			ENDNLA
Ceratocystis minor	Ceratocystis pini		Fungi (1FUNGK)	Ascomycota (1ASCOP)	Pezizomycotina (1PEZIQ)	Sordariomycetes (1SORDC)	Sordariomycetidae (1SRDAL)	Ophiostomatales (1OPHIO)		Ophiostomataceae (1OPHIF)		Ophiostoma (1OPHSG)	Pinus	1969	1924		Muskett and Malone 1983; FRDBI	2		OPHSMI
Ceratocystis platani			Fungi (1FUNGK)	Ascomycota (1ASCOP)	Pezizomycotina (1PEZIQ)	Sordariomycetes (1SORDC)	Hypocreomycetidae (1HYPRL)	Microascales (1MICRO)		Ceratocystidaceae (1CERKF)		Ceratocystis (1CERAG)	Planatus	Absent	Absent	Non-native EU (Santini et al. 2013)
Cerioporus squamosus	Polyporus squamosus	(Huds.) Quél.,	Fungi (1FUNGK)	Basidiomycota (1BASIP)		Agaricomycotina (1BASIC)	Agaricomycetes (1AGARL)	Polyporales (1PORIO)						1787	1800	Native (Ireland)	FRDBI, Ward et al 1993	2
Chionaspis pinifoliae	Phenacaspis pinifoliae; Hemichionapsis pinifoliae		Animalia (1ANIMK)	Arthropoda (1ARTHP)	Hexapoda (1HEXAQ)	Insecta (1INSEC)		Hemiptera (1HEMIO)	Sternorrhyncha (1STERR)	Diaspididae (1DIASF)		Chionaspis (1CHIOG)		1945	1984	Non-native to Europe (Kloet and Hincks 1945)	See government reports	2		PHECPI
Chionaspis salicis			Animalia (1ANIMK)	Arthropoda (1ARTHP)	Hexapoda (1HEXAQ)	Insecta (1INSEC)		Hemiptera (1HEMIO)	Sternorrhyncha (1STERR)	Diaspididae (1DIASF)		Chionaspis (1CHIOG)	Salix	1937	1903	Native to parts of Europe (Kloet and Hincks 1945); Native to Ireland (Quirke 1947)	Carpenter 1904; Browne 1968	2
Chlorophorus signaticollis	Chlorophorus fainanensis		Animalia (1ANIMK)	Arthropoda (1ARTHP)	Hexapoda (1HEXAQ)	Insecta (1INSEC)		Coleoptera (1COLEO)		Cerambycidae (1CERAF)					1991		Good and McAree 1991	2
Chondroplea populea	Dothichiza populea; Cryptodiaporthe populea	(Sacc. & Briard) Kleb.,	Fungi (1FUNGK)	Ascomycota (1ASCOP)	Pezizomycotina (1PEZIQ)	Sordariomycetes (1SORDC)	Sordariomycetidae (1SRDAL)	Diaporthales (1DIAPO)		Gnomoniaceae (1GNOMF)		Cryptodiaporthe (rejected name) (1CRYDG)		1972	1983	Non-native to Britain (Peace 1962)	See government reports; Ward et al 1993; FRDBI 2005	2		CRYDPO
Chondrostereum purpureum	Stereum purpureum		Fungi (1FUNGK)	Basidiomycota (1BASIP)		Agaricomycotina (1BASIC)	Agaricomycetes (1AGARL)	Agaricales (1AGARO)		Cyphellaceae (1CYPHF)		Chondrostereum (1KDOSG)	Prunus	1791	1840		Adams and Pethybridge 1910; Muskett and Malone 1980; FRDBI	2	RNQP	STERPU								Recorded												Recorded
Chrysolina hyperici			Animalia (1ANIMK)	Arthropoda (1ARTHP)	Hexapoda (1HEXAQ)	Insecta (1INSEC)		Coleoptera (1COLEO)		Chrysomelidae (1CHRYF)		Chrysolina (1CRYSG)		1827	1902	Native to parts of Europe (Kloet and Hincks 1945)	Johnson and Halpert 1902 as cited in Anderson et al 1997; NBN Atlas	2		CRYSHY
Chrysomyxa abietis		(Wallr.) Unger,	Fungi (1FUNGK)	Basidiomycota (1BASIP)		Pucciniomycotina (1TELIC)	Pucciniomycetes (1PUCCL)	Pucciniales (1UREDO)		Coleosporiaceae (1COLSF)		Chrysomyxa (1CHMYG)	Picea	1925	1918	Native to parts of Europe (Santini et al. 2013)	Pethybridge 1918 INJ; Muskett and Malone 1980; Ward et al 1993	2		CHMYAB				Recorded																								Recorded	Recorded
Chrysomyxa empetri			Fungi (1FUNGK)	Basidiomycota (1BASIP)		Pucciniomycotina (1TELIC)	Pucciniomycetes (1PUCCL)	Pucciniales (1UREDO)		Coleosporiaceae (1COLSF)		Chrysomyxa (1CHMYG)	Picea	1865	1929		Muskett and Malone 1980; Browne 1968, FRDBI	2		CHMYEM
Chrysomyxa ledi var. rhododendri			Fungi (1FUNGK)	Basidiomycota (1BASIP)		Pucciniomycotina (1TELIC)	Pucciniomycetes (1PUCCL)	Pucciniales (1UREDO)		Coleosporiaceae (1COLSF)		Chrysomyxa (1CHMYG)	Picea	1913	1918		FRDBI; Muskett and Malone 1980	2		CHMYRH
Chuppomyces handelii	Cercospora handelii; Pseudocercospora handelii		Fungi (1FUNGK)	Ascomycota (1ASCOP)	Pezizomycotina (1PEZIQ)	Dothideomycetes (1DOTHC)	Dothideomycetidae (1DTHDL)	Capnodiales (1CAPDO)					Rhododendron	1959	1983		See government reports; FRDBI	2
Cimbex connatus	Cinbex connata	Schrank, 1776	Animalia (1ANIMK)	Arthropoda (1ARTHP)	Hexapoda (1HEXAQ)	Insecta (1INSEC)		Hymenoptera (1HYMEO)		Cimbicidae			Alnus	1945	1968	Native to parts of Europe (Kloet and Hincks 1945)	Browne 1968, kloet and hincks 1945; Liston et al. 2014 Biodiversity data journal	2
Cimbex femoratus	Cimbex sylvarum	Linnaeus, 1758	Animalia (1ANIMK)	Arthropoda (1ARTHP)	Hexapoda (1HEXAQ)	Insecta (1INSEC)		Hymenoptera (1HYMEO)		Cimbicidae			Alnus	1945	1916	Native to parts of Europe (Kloet and Hincks 1945)	Halbert 1922; Browne 1968, kloet and hincks 1945; Liston et al. 2014	2
Cinara confinis			Animalia (1ANIMK)	Arthropoda (1ARTHP)	Hexapoda (1HEXAQ)	Insecta (1INSEC)		Hemiptera (1HEMIO)	Sternorrhyncha (1STERR)	Aphididae (1APHIF)		Cinara (1CINAG)	Abies	1972	1973		Carter et al 1987 INJ; Brc.ac.uk	2		TODOAB
Cinara costata			Animalia (1ANIMK)	Arthropoda (1ARTHP)	Hexapoda (1HEXAQ)	Insecta (1INSEC)		Hemiptera (1HEMIO)	Sternorrhyncha (1STERR)	Aphididae (1APHIF)		Cinara (1CINAG)	Picea	1952	1941		Carter et al 1987 INJ; BRC.ac.uk	2		CINACS
Cinara cupressi			Animalia (1ANIMK)	Arthropoda (1ARTHP)	Hexapoda (1HEXAQ)	Insecta (1INSEC)		Hemiptera (1HEMIO)	Sternorrhyncha (1STERR)	Aphididae (1APHIF)		Cinara (1CINAG)		1985	2001	Non-native to Ireland (Carter et al. 1987); non-native to Britain (Browne 1968)	IE EU-forest health survey 2002; BRC.ac.uk	3		CUPRCU
Cinara kochiana			Animalia (1ANIMK)	Arthropoda (1ARTHP)	Hexapoda (1HEXAQ)	Insecta (1INSEC)		Hemiptera (1HEMIO)	Sternorrhyncha (1STERR)	Aphididae (1APHIF)		Cinara (1CINAG)	Larix	1972	1979	Non-native to Ireland (Carter et al. 1987)	Carter et al 1987 INJ	2		CINAKO
Cinara piceae			Animalia (1ANIMK)	Arthropoda (1ARTHP)	Hexapoda (1HEXAQ)	Insecta (1INSEC)		Hemiptera (1HEMIO)	Sternorrhyncha (1STERR)	Aphididae (1APHIF)		Cinaropsis (1CINOG)	Picea	1929	1964	Non-native to Ireland (Carter et al. 1987)	Carter et al 1987 INJ; Browne 1968	2		CINOPC
cinara pilicornis	Cinaria pinicola		Animalia (1ANIMK)	Arthropoda (1ARTHP)	Hexapoda (1HEXAQ)	Insecta (1INSEC)		Hemiptera (1HEMIO)	Sternorrhyncha (1STERR)	Aphididae (1APHIF)		Cinaropsis (1CINOG)	Picea	1841	1942		Carter et al 1987 INJ; Doncaster 1961 as cited in Day 1998	2		CINOPL
Cinara pinea			Animalia (1ANIMK)	Arthropoda (1ARTHP)	Hexapoda (1HEXAQ)	Insecta (1INSEC)		Hemiptera (1HEMIO)	Sternorrhyncha (1STERR)	Aphididae (1APHIF)		Cinara (1CINAG)	Pinus	1948	1973		Carter et al 1987 INJ; Doncaster 1961 as cited in Day 1998	2		CINAPU
cinara pini			Animalia (1ANIMK)	Arthropoda (1ARTHP)	Hexapoda (1HEXAQ)	Insecta (1INSEC)		Hemiptera (1HEMIO)	Sternorrhyncha (1STERR)	Aphididae (1APHIF)		Cinara (1CINAG)		1929	1942	Native to parts of Europe (Kloet and Hincks 1945)	Carter et al 1987 INJ; brc.ac.uk; Browne 1968	2		CINAPI
Cinara pinihabitans			Animalia (1ANIMK)	Arthropoda (1ARTHP)	Hexapoda (1HEXAQ)	Insecta (1INSEC)		Hemiptera (1HEMIO)	Sternorrhyncha (1STERR)	Aphididae (1APHIF)		Cinara (1CINAG)	Pinus	1972	1984		Carter et al 1987 INJ; brc.ac.uk	2
Cinara pruinosa			Animalia (1ANIMK)	Arthropoda (1ARTHP)	Hexapoda (1HEXAQ)	Insecta (1INSEC)		Hemiptera (1HEMIO)	Sternorrhyncha (1STERR)	Aphididae (1APHIF)		Cinara (1CINAG)	Picea	1972	1975		Carter et al 1987 INJ	2		CINOPR
Cladius grandis	Trichiocampus viminalis; Priophorus viminalis		Animalia (1ANIMK)	Arthropoda (1ARTHP)	Hexapoda (1HEXAQ)	Insecta (1INSEC)		Hymenoptera (1HYMEO)		Tenthredinidae (1TENTF)			Populus	1945	1968	Native to parts of Europe (Kloet and Hincks 1945)	Browne 1968; Kloet and Hincks 1945	2
Cladius ulmi	Priophorus laevifrons		Animalia (1ANIMK)	Arthropoda (1ARTHP)	Hexapoda (1HEXAQ)	Insecta (1INSEC)		Hymenoptera (1HYMEO)		Tenthredinidae (1TENTF)			Ulmus	1945	1968	Native to parts of Europe (Kloet and Hincks 1945)	Browne 1968; Kloet and Hincks 1945	2
Cladosporium herbarum		(Pers.) Link,	Fungi (1FUNGK)	Ascomycota (1ASCOP)	Pezizomycotina (1PEZIQ)	Dothideomycetes (1DOTHC)	Dothideomycetidae (1DTHDL)	Capnodiales (1CAPDO)		Mycosphaerellaceae (1MYCOF)		Davidiella (1DAVIG)		1866	1884	Native (Ireland)	Ward et al 1993	2		MYCOTA
Clasterosporium flexum			Fungi (1FUNGK)	Ascomycota (1ASCOP)	Pezizomycotina (1PEZIQ)	Sordariomycetes (1SORDC)	Magnaporthaceae	Magnaporthales					Chamaecyparis	1981	absent		Jones and Baker 2007
Coleophora laricella			Animalia (1ANIMK)	Arthropoda (1ARTHP)	Hexapoda (1HEXAQ)	Insecta (1INSEC)		Lepidoptera (1LEPIO)		Coleophoridae (1COLEF)		Coleophora (1COLEG)	Larix	1876	1904	Native to parts of Europe (Kloet and Hincks 1945); Native to Ireland (Quirke 1947)	Elwes and Henry 1906; Forestry comission 1920; Browne 1968, NBN atlas; Theobald 1904	2		COLELA
Coleosporium tussilaginis	coleosporium senecionis	(Pers.) Lév. (1849);	Fungi (1FUNGK)	Basidiomycota (1BASIP)		Pucciniomycotina (1TELIC)	Pucciniomycetes (1PUCCL)	Pucciniales (1UREDO)		Coleosporiaceae (1COLSF)		Coleosporium (1COLSG)	Pinus sylvestris	1822	1852	Native (Ireland)	FRDBI; Ward et al 1993; Muskett and Malone 1980	2		COLSTU															Recorded
Colletotrichum gloeosporioides	Gloeosporium rhododendri; Glomerella cingulata		Fungi (1FUNGK)	Ascomycota (1ASCOP)	Pezizomycotina (1PEZIQ)	Sordariomycetes (1SORDC)	Sordariomycetidae (1SRDAL)	Phyllachorales (1PHYRO)		Glomerellaceae (1GLOMF)		Colletotrichum (1COLLG)	Rhododendron	1855	1983	Non-native to Europe (Santini et al. 2013)	Annual report NI 1983; FRDBI	2		COLLGL
Cossus cossus			Animalia (1ANIMK)	Arthropoda (1ARTHP)	Hexapoda (1HEXAQ)	Insecta (1INSEC)		Lepidoptera (1LEPIO)		Cossidae (1COSSF)		Cossus (1COSSG)		1799	1936	Native to parts of Europe (Kloet and Hincks 1945)	Donovan 1936, as cited in Baynes 1964; Bond et al. 2006; Alexander 2007, PlantWise 1964; NBN Atlas	1		COSSCO
Craesus alniastri	Croesus varus		Animalia (1ANIMK)	Arthropoda (1ARTHP)	Hexapoda (1HEXAQ)	Insecta (1INSEC)		Hymenoptera (1HYMEO)		Tenthredinidae (1TENTF)			Alnus	1951	1968	Native to parts of Europe (Kloet and Hincks 1945)	Browne 1968, Liston et al. 2014	2
Craesus latipes	Croesus latipes		Animalia (1ANIMK)	Arthropoda (1ARTHP)	Hexapoda (1HEXAQ)	Insecta (1INSEC)		Hymenoptera (1HYMEO)		Tenthredinidae (1TENTF)			Betula, Alnus	1827	1968	Native to parts of Europe (Kloet and Hincks 1945)	Browne 1968, NBN atlas; Liston et al. 2014	2
Craesus septentrionalis			Animalia (1ANIMK)	Arthropoda (1ARTHP)	Hexapoda (1HEXAQ)	Insecta (1INSEC)		Hymenoptera (1HYMEO)		Tenthredinidae (1TENTF)			Alnus, Betula, Fraxinus, Populus	1827	1968	Native to parts of Europe (Kloet and Hincks 1945)	Browne 1968, NBN atlas; Liston et al. 2014	2
Cristulariella depraedans			Fungi (1FUNGK)	Ascomycota (1ASCOP)	Pezizomycotina (1PEZIQ)	Leotiomycetes (1LETOC)		Helotiales (1HELOO)		Sclerotiniaceae (1SCLEF)		Cristulariella (anamorphic genus) (1CRISG)	Acer	1879	2012	Native to parts of Europe (Santini et al. 2013)	Moore 1959; FRDBI; AFBI Forest survey	2		CRISDE
Cronartium pini	Cronartium flaccidum; Peridermium pini		Fungi (1FUNGK)	Basidiomycota (1BASIP)		Pucciniomycotina (1TELIC)	Pucciniomycetes (1PUCCL)	Pucciniales (1UREDO)		Cronartiaceae (1CRONF)		Cronartium (1CRONG)	Pinus	1858	1911		Muskett and Malone 1980; Moore 1959; Browne 1968, FRDBI	2		ENDCPI
Cronartium quercuum	Cronartium fusiforme	(Berk.) Miyabe ex Shirai (1899);	Fungi (1FUNGK)	Basidiomycota (1BASIP)		Pucciniomycotina (1TELIC)	Pucciniomycetes (1PUCCL)	Pucciniales (1UREDO)		Cronartiaceae (1CRONF)		Cronartium (1CRONG)		1872	Absent		McAree and Mackenzie 1993			CRONQU
Cronartium ribicola	Peridermium strobi	J.C. Fisch. (1872);	Fungi (1FUNGK)	Basidiomycota (1BASIP)		Pucciniomycotina (1TELIC)	Pucciniomycetes (1PUCCL)	Pucciniales (1UREDO)		Cronartiaceae (1CRONF)		Cronartium (1CRONG)	Pinus, Pinus strobus, Ribes	1892	1920	Non-native to Europe (Santini et al. 2013)	FRDBI; Ward et al 1993; Muskett and Malone 1980; Plowright 1892 as cited in Elwes and Henry 1910	2	Quarantine	CRONRI					Recorded											Recorded		Recorded	Recorded		Recorded
Crumenulopsis sororia	Crumenula sororia	(P. Karst.) J.W. Groves	Fungi (1FUNGK)	Ascomycota (1ASCOP)	Pezizomycotina (1PEZIQ)	Leotiomycetes (1LETOC)		Helotiales (1HELOO)		Helotiaceae (1HELOF)		Crumenulopsis (1CRUMG)		1960	1980		See government reports; Ward et al 1993; FRDBI	2		CRUMSO
Cryphalus abietis			Animalia (1ANIMK)	Arthropoda (1ARTHP)	Hexapoda (1HEXAQ)	Insecta (1INSEC)		Coleoptera (1COLEO)		Scolytidae (1SCOLF)		Cryphalus (1CRYHG)	Picea, Pseudotsuga, Abies	1919	1910	Native to parts of Europe (Kloet and Hincks 1945)	Forbes 1910 INJ; O Connor et al. 1991	2		CRYHAB
Cryphonectria parasitica	Endothia parasitica	(Murrill) M.E. Barr,	Fungi (1FUNGK)	Ascomycota (1ASCOP)	Pezizomycotina (1PEZIQ)	Sordariomycetes (1SORDC)	Sordariomycetidae (1SRDAL)	Diaporthales (1DIAPO)		Cryphonectriaceae (1CRYNF)		Cryphonectria (1CRYNG)	Castanea	2011	Absent	Non-native to Europe (Santini et al. 2013)	McAree and Mackenzie 1993; Horgan et al. 2004		Quarantine/RNQP	ENDOPA
Cryptococcus fagisuga	Cryptococcus fagi		Animalia (1ANIMK)	Arthropoda (1ARTHP)	Hexapoda (1HEXAQ)	Insecta (1INSEC)		Hemiptera (1HEMIO)	Sternorrhyncha (1STERR)	Eriococcidae (1ERICF)		Cryptococcus (1CRYCG)	Fagus	1908	1900	Native to parts of Europe (Kloet and Hincks 1945)	Carpenter 1903; Gillanders 1908 as cited in Elwes and Henry 1910; Stendall 1922 INJ; EPPO 2020a; brc.ac.uk; Newstead 1900	2		CRYCFA
Cryptodiaporthe populea			Fungi (1FUNGK)	Ascomycota (1ASCOP)	Pezizomycotina (1PEZIQ)	Sordariomycetes (1SORDC)	Sordariomycetidae (1SRDAL)	Diaporthales (1DIAPO)		Gnomoniaceae (1GNOMF)		Cryptodiaporthe (rejected name) (1CRYDG)	Populus	1923	2005		Moore 1959; FRDBI	2		CRYDPO
Cryptomyces maximus			Fungi (1FUNGK)	Ascomycota (1ASCOP)	Pezizomycotina (1PEZIQ)	Leotiomycetes (1LETOC)		Rhytismatales (1RHYTO)		Rhytismataceae (1RHYTF)		Cryptomyces (1KRMYG)	Salix	1925	1964		Alcock and Maxwell 1925 as cited in Phillips and Burdekin 1982; FRDBI	2		KRMYMA
Cryptorhynchus lapathi			Animalia (1ANIMK)	Arthropoda (1ARTHP)	Hexapoda (1HEXAQ)	Insecta (1INSEC)		Coleoptera (1COLEO)		Curculionidae (1CURCF)		Cryptorhynchus (1CRYPG)	Populus	1762	1914	Native to parts of Europe (Kloet and Hincks 1945)	Bullock 1914; PlantWise	2		CRYPLA
Cryptorhynchus rufescens			Animalia (1ANIMK)	Arthropoda (1ARTHP)	Hexapoda (1HEXAQ)	Insecta (1INSEC)		Coleoptera (1COLEO)		Curculionidae (1CURCF)		Cryptorhynchus (1CRYPG)		Absent	2000 (interception)	Non-native to Britain (Morris 2002)	Ashe et al. 2002	1
Cryptostroma corticale		(Ellis & Everh.) P.H. Greg. & S. Waller (1952	Fungi (1FUNGK)	Ascomycota (1ASCOP)	Pezizomycotina (1PEZIQ)							Cryptostroma (anamorphic genus) (1CRPSG)	Acer	1945	2004	Non-native to Europe (Santini et al. 2013)	Horgan et al. 2004; Forestry Commission 1953	2		CRPSCO
Ctenarytaina eucalypti	Rhinocola eucalypti		Animalia (1ANIMK)	Arthropoda (1ARTHP)	Hexapoda (1HEXAQ)	Insecta (1INSEC)		Hemiptera (1HEMIO)	Sternorrhyncha (1STERR)	Aphalaridae (1APHAF)		Ctenarytaina (1CTNRG)		1922	1995	Non-native to Ireland (Purvis et al. 2002)	Purvis et al., 2002 Ann Appl Biol; Laing 1922	1		CTNREU
Cucurbitaria piceae	Gemmamyces piceae	Borthw.,	Fungi (1FUNGK)	Ascomycota (1ASCOP)	Pezizomycotina (1PEZIQ)	Dothideomycetes (1DOTHC)	Pleosporomycetidae (1PLEOL)	Pleosporales (1PLEOO)		Cucurbitariaceae (1CUCBF)		Cucurbitaria (1CUCBG)	Picea	1906	1910		Ward et al 1993; Muskett and Malone 1983; Borthwick 1906 as cited in Elwes and Henry 1912	2		CUCBPI
Cyclaneusma minus	Naemacyclus niveus	(Butin) DiCosmo, Peredo & Minter (1983)	Fungi (1FUNGK)	Ascomycota (1ASCOP)	Pezizomycotina (1PEZIQ)	Leotiomycetes (1LETOC)		Rhytismatales (1RHYTO)		Rhytismataceae (1RHYTF)		Cyclaneusma (1CYKLG)	Pinus radiata, P. contorta	1894	1967		See government reports; Ward et al 1993; FRDBI; A. Pfiffer pers. Comm. , Horgan et al. 2004; Muskett and Malone 1983	2		NAEMMI
Cylindrocladium buxicola		Henricot (2002);	Fungi (1FUNGK)	Ascomycota (1ASCOP)	Pezizomycotina (1PEZIQ)	Sordariomycetes (1SORDC)	Hypocreomycetidae (1HYPRL)	Hypocreales (1HYPRO)		Nectriaceae (1NECTF)		Cylindrocladium (anamorphic genus) (1CYLDG)	Buxus	1994	2009	Non-native to Europe (Santini et al. 2013)	Henricot et al. 2000 Plant path; Jones and Baker 2007; See government reports	1		CYLDBU
cynips quercusfolii			Animalia (1ANIMK)	Arthropoda (1ARTHP)	Hexapoda (1HEXAQ)	Insecta (1INSEC)		Hymenoptera (1HYMEO)		Cynipidae (1CYNIF)		Cynips (1CYNIG)		1800	1992	Native to parts of Europe (Kloet and Hincks 1945)	O'Connor et al 1993	2		CYNIQU
Cytospora populina	Cytospora ambiens		Fungi (1FUNGK)	Ascomycota (1ASCOP)	Pezizomycotina (1PEZIQ)	Sordariomycetes (1SORDC)	Sordariomycetidae (1SRDAL)	Diaporthales (1DIAPO)		Valsaceae (1VALSF)			Populus	1829	1967		See government reports; FRDBI	2
Daldinia concentrica			Fungi (1FUNGK)	Ascomycota (1ASCOP)	Pezizomycotina (1PEZIQ)	Sordariomycetes (1SORDC)	Xylariomycetidae (1XYLAL)	Xylariales (1XYLAO)		Xylariaceae (1XYLAF)		Daldinia (1DALDG)		1791	1726	Native (Ireland)	Muskett and Malone 1983	2		DALDCO
Dascillus cervinus			Animalia (1ANIMK)	Arthropoda (1ARTHP)	Hexapoda (1HEXAQ)	Insecta (1INSEC)		Coleoptera (1COLEO)		Dascillidae (1DASLF)		Dascillus (1DASLG)		1819	1894	Native to parts of Europe (Kloet and Hincks 1945)	Johnson 1895; NBN Atlas	2		DASLCE
Dendroctonus brevicomis	Dendroctonus frontalis		Animalia (1ANIMK)	Arthropoda (1ARTHP)	Hexapoda (1HEXAQ)	Insecta (1INSEC)		Coleoptera (1COLEO)		Scolytidae (1SCOLF)		Dendroctonus (1DENCG)		1991	1981 (interception)		O Connor et al. 1983, 1991	2		DENCBR
Dendroctonus micans			Animalia (1ANIMK)	Arthropoda (1ARTHP)	Hexapoda (1HEXAQ)	Insecta (1INSEC)		Coleoptera (1COLEO)		Scolytidae (1SCOLF)		Dendroctonus (1DENCG)	Picea	1973	Absent		Bevan 1987		Quarantine	DENCMI
Dendroctonus rufipennis			Animalia (1ANIMK)	Arthropoda (1ARTHP)	Hexapoda (1HEXAQ)	Insecta (1INSEC)		Coleoptera (1COLEO)		Scolytidae (1SCOLF)		Dendroctonus (1DENCG)		Absent	1980 (interception)		O'Connor and Nash 1982	2		DENCRU
Dendroctonus valens			Animalia (1ANIMK)	Arthropoda (1ARTHP)	Hexapoda (1HEXAQ)	Insecta (1INSEC)		Coleoptera (1COLEO)		Scolytidae (1SCOLF)				absent	absent
Dendrolimus pini			Animalia (1ANIMK)	Arthropoda (1ARTHP)	Hexapoda (1HEXAQ)	Insecta (1INSEC)		Lepidoptera (1LEPIO)		Lasiocampidae (1LASIF)		Dendrolimus (1DENDG)	Pinus	2007	Absent					DENDPI
Dendrolimus sibiricus		Tschetverikov	Animalia (1ANIMK)	Arthropoda (1ARTHP)	Hexapoda (1HEXAQ)	Insecta (1INSEC)		Lepidoptera (1LEPIO)		Lasiocampidae (1LASIF)		Dendrolimus (1DENDG)		Absent	absent
Diaporthe crustosa	Phomopsis crustosa		Fungi (1FUNGK)	Ascomycota (1ASCOP)	Pezizomycotina (1PEZIQ)	Sordariomycetes (1SORDC)	Sordariomycetidae (1SRDAL)	Diaporthales (1DIAPO)		Diaporthaceae (1DIAPF)		Diaporthe (1DIAPG)	Ilex	1910	1910		FRDBI; Muskett and Malone 1983	2
Diaporthe eres	Phomopsis occulta		Fungi (1FUNGK)	Ascomycota (1ASCOP)	Pezizomycotina (1PEZIQ)	Sordariomycetes (1SORDC)	Sordariomycetidae (1SRDAL)	Diaporthales (1DIAPO)		Diaporthaceae (1DIAPF)		Diaporthe (1DIAPG)	Fraxinus	1835	1935		FRDBI; Muskett and Malone 1983	2		DIAPER
Didymascella chamaecyparidis	Keithia chamaecyparisii		Fungi (1FUNGK)	Ascomycota (1ASCOP)	Pezizomycotina (1PEZIQ)	Leotiomycetes (1LETOC)		Helotiales (1HELOO)		Hemiphacidiaceae (1HEMPF)		Didymascella (1DIDSG)	Chamaecyparis lawsoniana	1919	1972		Moore 1959; Peace 1962; See government reports	2
Didymascella thujina	Keithia thujina	(E.J. Durand) Maire (1927);	Fungi (1FUNGK)	Ascomycota (1ASCOP)	Pezizomycotina (1PEZIQ)	Leotiomycetes (1LETOC)		Helotiales (1HELOO)		Hemiphacidiaceae (1HEMPF)		Didymascella (1DIDSG)	Thuja plicata	1919	1919	Non-native to Europe (Santini et al. 2013)	Ward et al 1993; Horgan et al. 2004; Fitzpatrick 1965 as cited in Bothwell 1998 SIF; Moore 1959	2		DIDSTH									Recorded	Recorded
Dineura virididorsata			Animalia (1ANIMK)	Arthropoda (1ARTHP)	Hexapoda (1HEXAQ)	Insecta (1INSEC)		Hymenoptera (1HYMEO)		Tenthredinidae (1TENTF)			Betula	1890	1968	Native to parts of Europe (Kloet and Hincks 1945)	Browne 1968, NBN atlas; Liston et al. 2014	2
Dioryctria abietella			Animalia (1ANIMK)	Arthropoda (1ARTHP)	Hexapoda (1HEXAQ)	Insecta (1INSEC)		Lepidoptera (1LEPIO)		Pyralidae (1PYRAF)		Dioryctria (1DIORG)	Pinus	1945	2006	Native to parts of Europe (Kloet and Hincks 1945)	Bond et al. 2006; kloet and hincks 1945	1		DIORAB
Diprion pini	Lophyrus pini		Animalia (1ANIMK)	Arthropoda (1ARTHP)	Hexapoda (1HEXAQ)	Insecta (1INSEC)		Hymenoptera (1HYMEO)		Diprionidae (1DIPRF)		Diprion (1DIPRG)	Pinus	1919	1906	Native Ireland (Quirke 1947)	Carpenter 1906, 1907 EB; See government reports; NBN atlas; Liston et al. 2014	2		DIPRPI
Discella acerum	Diplodina acerum		Fungi (1FUNGK)	Ascomycota (1ASCOP)	Pezizomycotina (1PEZIQ)	Dothideomycetes (1DOTHC)	Dothideomycetidae (1DTHDL)	Capnodiales (1CAPDO)		Mycosphaerellaceae (1MYCOF)			Acer	1932	1971		See government reports	2
Discula destructiva		Redlin (1991)	Fungi (1FUNGK)	Ascomycota (1ASCOP)	Pezizomycotina (1PEZIQ)	Sordariomycetes (1SORDC)	Sordariomycetidae (1SRDAL)	Diaporthales (1DIAPO)		Valsaceae (1VALSF)		Discula (anamorphic genus) (1DISCG)		1933	1995	Non-native to Europe (Santini et al. 2013)	McCracken 1996; Jones and Baker 2007	2		DISCDE
Dothidella ulmi	Platychora ulmi		Fungi (1FUNGK)	Ascomycota (1ASCOP)	Pezizomycotina (1PEZIQ)	Dothideomycetes (1DOTHC)							Ulmus	1870	1878	Native (Ireland)	Muskett and Malone 1983; FRDBI	2
Dothistroma septosporum	Mycosphaerella pini		Fungi (1FUNGK)	Ascomycota (1ASCOP)	Pezizomycotina (1PEZIQ)	Dothideomycetes (1DOTHC)	Dothideomycetidae (1DTHDL)	Capnodiales (1CAPDO)		Mycosphaerellaceae (1MYCOF)		Dothistroma (anamorphic genus) (1DOTSG)	Pinus	1953	2012	Non-native to Europe (Santini et al. 2013)	EFSA report on D septosporum; Drenkan et al. 2016; Mullet et al. 2018	1	RNQP	SCIRPI
Drepanopeziza populorum	Marssonina populi		Fungi (1FUNGK)	Ascomycota (1ASCOP)	Pezizomycotina (1PEZIQ)	Leotiomycetes (1LETOC)		Helotiales (1HELOO)		Dermateaceae (1DERMF)		Drepanopeziza (1DREPG)	Populus	1905	1960		See government reports	2		DREPPO															Recorded					Recorded		Recorded
Drepanopeziza sphaerioides	Marssonia salicicola		Fungi (1FUNGK)	Ascomycota (1ASCOP)	Pezizomycotina (1PEZIQ)	Leotiomycetes (1LETOC)		Helotiales (1HELOO)		Dermateaceae (1DERMF)		Drepanopeziza (1DREPG)	Salix	1841	1963	Native to parts of Europe (Santini et al. 2013)	See government reports; FRDBI	2																								Recorded
Drepanosiphum platanoidis	drepanosiphum platanoides	Koch.	Animalia (1ANIMK)	Arthropoda (1ARTHP)	Hexapoda (1HEXAQ)	Insecta (1INSEC)		Hemiptera (1HEMIO)	Sternorrhyncha (1STERR)	Aphididae (1APHIF)		Drepanosiphum (1DRESG)	Acer	1926	1968	Native to parts of Europe (Kloet and Hincks 1945)	Browne 1968	2		DRESPL
Dreyfusia nordmannianae	Adelges nordmannianae		Animalia (1ANIMK)	Arthropoda (1ARTHP)	Hexapoda (1HEXAQ)	Insecta (1INSEC)		Hemiptera (1HEMIO)	Sternorrhyncha (1STERR)	Adelgidae (1ADLGF)		Dreyfusia (1DREYG)	Abies	1973	1941	Non-native to Europe (Cabi 2020)	Carter et al. 1987; EPPO 2020a	2		DREYNU
Dreyfusia piceae	Adelghes piceae, Chermes piceae		Animalia (1ANIMK)	Arthropoda (1ARTHP)	Hexapoda (1HEXAQ)	Insecta (1INSEC)		Hemiptera (1HEMIO)	Sternorrhyncha (1STERR)	Adelgidae (1ADLGF)		Dreyfusia (1DREYG)	Picea	1882	1895		Masters 1882 as cited in Elwes and Henry 1909; Carter et al. 1987; EPPO 2020a	2		ADLGPI
Dryocoetes affaber			Animalia (1ANIMK)	Arthropoda (1ARTHP)	Hexapoda (1HEXAQ)	Insecta (1INSEC)		Coleoptera (1COLEO)		Scolytidae (1SCOLF)		Dryocoetes (1DRYOG)		Absent	1979 (Interception)		O Connor and Nash 1979; O Connor et al. 1991	2		DRYOAF
Dryocoetes autographus			Animalia (1ANIMK)	Arthropoda (1ARTHP)	Hexapoda (1HEXAQ)	Insecta (1INSEC)		Coleoptera (1COLEO)		Scolytidae (1SCOLF)		Dryocoetes (1DRYOG)		1934	1935 (Interception)	Native to parts of Europe (Kloet and Hincks 1945)	O Connor et al 1991; NBN atlas	2		DRYOAU
Dryocoetes villosus			Animalia (1ANIMK)	Arthropoda (1ARTHP)	Hexapoda (1HEXAQ)	Insecta (1INSEC)		Coleoptera (1COLEO)		Scolytidae (1SCOLF)		Dryocoetes (1DRYOG)		1895	1947	Native to parts of Europe (Kloet and Hincks 1945); Native to Ireland (Quirke 1947)	NBN atlas; Quirke 1947	2		DRYOVI
Elatobium abietinum	Neomyzaphis abietina		Animalia (1ANIMK)	Arthropoda (1ARTHP)	Hexapoda (1HEXAQ)	Insecta (1INSEC)		Hemiptera (1HEMIO)	Sternorrhyncha (1STERR)	Aphididae (1APHIF)		Elatobium (1ELATG)	Picea	1849	1914	Native Ireland (Quirke 1947); Native to parts of Europe (Kloet and Hincks 1945); Exotic to Europe (CABI 2020; Bevan 1987)	Carter et al 1987; See government reports; Doncaster 1961 as cited in Day et al 1998	2		LIOAAB		Recorded																Recorded			Recorded			Recorded			Recorded
Elongisporangium anandrum	Pythium anandrum		Chromista (1CHROK)	Pseudofungi (1PSDFP)		Oomycetes (1OOMYC)		Peronosporales (1PEROO)		Peronosporaceae (1PEROF)			Picea sitchensis	1974	1969		See government reports	2
Elsinoe mattiroloanum			Fungi (1FUNGK)	Ascomycota (1ASCOP)	Pezizomycotina (1PEZIQ)	Dothideomycetes (1DOTHC)							Arbutus unedo	1978	absent		Jones and Baker 2007
Epicoccum nigrum	Epicoccum purpurascens	Link (1816)	Fungi (1FUNGK)	Ascomycota (1ASCOP)	Pezizomycotina (1PEZIQ)	Dothideomycetes (1DOTHC)	Pleosporomycetidae (1PLEOL)	Pleosporales (1PLEOO)		Didymellaceae (1DIDYF)		Epicoccum (1EPCCG)		1840	1878	Native (Ireland)	Muskett and Malone 1985; FRDBI	2		PHOMEC
Epinotia nanana			Animalia (1ANIMK)	Arthropoda (1ARTHP)	Hexapoda (1HEXAQ)	Insecta (1INSEC)		Lepidoptera (1LEPIO)		Tortricidae (1TORTF)		Epinotia (1EPING)	Picea	1874	2006		Bond et al. 2006	1		EPINNA
Epinotia pygmaeana			Animalia (1ANIMK)	Arthropoda (1ARTHP)	Hexapoda (1HEXAQ)	Insecta (1INSEC)		Lepidoptera (1LEPIO)		Tortricidae (1TORTF)		Epinotia (1EPING)		1890	2010		Walsh et al. 2013 INJ	1		EPINPY
Epinotia tedella			Animalia (1ANIMK)	Arthropoda (1ARTHP)	Hexapoda (1HEXAQ)	Insecta (1INSEC)		Lepidoptera (1LEPIO)		Tortricidae (1TORTF)		Epinotia (1EPING)		1869	1970		See government reports; NBN atlas	2		EPIBTE
Epirrita autumnata			Animalia (1ANIMK)	Arthropoda (1ARTHP)	Hexapoda (1HEXAQ)	Insecta (1INSEC)		Lepidoptera (1LEPIO)		Geometridae (1GEOMF)			Pinus, Betula	1970	2006		Bond et al. 2006; NorfolkMoths.co.uk	1
Eriocampa ovata			Animalia (1ANIMK)	Arthropoda (1ARTHP)	Hexapoda (1HEXAQ)	Insecta (1INSEC)		Hymenoptera (1HYMEO)		Tenthredinidae (1TENTF)		Eriocampa (1ERIAG)	Alnus	1917	1968	Native to parts of Europe (Kloet and Hincks 1945)	Browne 1968, NBN atlas	2		ERIAOV
Eriophyes tiliae	Eucallipterus tiliae		Animalia (1ANIMK)	Arthropoda	Chelicerata	Arachnida		Prostigmata		Eriophyidae			Tilia	1949	1939		Carter et al. 1987; EPPO 2020a; NBN	2
Eriosoma ulmi			Animalia (1ANIMK)	Arthropoda (1ARTHP)	Hexapoda (1HEXAQ)	Insecta (1INSEC)		Hemiptera (1HEMIO)	Sternorrhyncha (1STERR)	Aphididae (1APHIF)		Eriosoma (1ERISG)	Ulmus	1929	1968	Native to parts of Europe (Kloet and Hincks 1945)	Browne 1968, NBN atlas	2		SCHZUL
Erwinia amylovora		(Burrill 1882) Winslow et al. 1920	Bacteria (1BACTK)	Proteobacteria (1PROBP)		Gammaproteobacteria (1GAMBC)		Enterobacterales (1ENTEO)		Erwiniaceae (1ERWIF)		Erwinia (1ERWIG)	Crataegus	1956	1986	Non-native to Ireland (Brennan et al. 2002)	EPPO 2020b; Hume and Conway 1993; Ward et al 1993	1	Quarantine/RNQP	ERWIAM
Erwinia billingiae			Bacteria (1BACTK)	Proteobacteria (1PROBP)		Gammaproteobacteria (1GAMBC)		Enterobacterales (1ENTEO)		Erwiniaceae (1ERWIF)		Erwinia (1ERWIG)	Aesculus	1958	2016		McEvoy et al. 2016; Mergaert et al. 1999	1
Erwinia rhapontici			Bacteria (1BACTK)	Proteobacteria (1PROBP)		Gammaproteobacteria (1GAMBC)		Enterobacterales (1ENTEO)		Erwiniaceae (1ERWIF)		Erwinia (1ERWIG)	Quercus	1981	2017		R. O'Hanlon 2017 unpublished; Plantwise	4		ERWIRH
Erwinia toletana			Bacteria (1BACTK)	Proteobacteria (1PROBP)		Gammaproteobacteria (1GAMBC)		Enterobacterales (1ENTEO)		Erwiniaceae (1ERWIF)		Erwinia (1ERWIG)	Aesculus	Absent	2016		McEvoy et al. 2016	1
Erysiphe adunca var. adunca	Uncinula adunca		Fungi (1FUNGK)	Ascomycota (1ASCOP)	Pezizomycotina (1PEZIQ)	Leotiomycetes (1LETOC)		Erysiphales (1ERYSO)		Erysiphaceae (1ERYSF)		Microsphaera (1MCRSG)	Salix	1901	1878		Muskett and Malone 1983; FRDBI	2
Erysiphe alphitoides	Microsphaera alphitoides; Oidium quercinum	(Griffon & Maubl.) U. Braun & S. Takam.,	Fungi (1FUNGK)	Ascomycota (1ASCOP)	Pezizomycotina (1PEZIQ)	Leotiomycetes (1LETOC)		Erysiphales (1ERYSO)		Erysiphaceae (1ERYSF)		Microsphaera (1MCRSG)	Quercus	1908	1925	Non-native to Britain (Phillips and Burdekin 1982)	Ward et al 1993; See government reports; Muskett and Malone 1985; FRDBI; Cotton 1919	2		MCRSAL			Recorded	Recorded	Recorded
Erysiphe azaleae			Fungi (1FUNGK)	Ascomycota (1ASCOP)	Pezizomycotina (1PEZIQ)	Leotiomycetes (1LETOC)		Erysiphales (1ERYSO)		Erysiphaceae (1ERYSF)		Microsphaera (1MCRSG)	Rhododendron	1980	absent		Jones and Baker 2007
Erysiphe flexuosa			Fungi (1FUNGK)	Ascomycota (1ASCOP)	Pezizomycotina (1PEZIQ)	Leotiomycetes (1LETOC)		Erysiphales (1ERYSO)		Erysiphaceae (1ERYSF)		Erysiphe (1ERYSG)	Aesculus	2002	Absent		Jones and Baker 2007			ERYSFL
Erysiphe platani			Fungi (1FUNGK)	Ascomycota (1ASCOP)	Pezizomycotina (1PEZIQ)	Leotiomycetes (1LETOC)		Erysiphales (1ERYSO)		Erysiphaceae (1ERYSF)		Erysiphe (1ERYSG)	Platanus	1983	absent		Jones and Baker 2007			ERYSPT
Eulachnus agilis			Animalia (1ANIMK)	Arthropoda (1ARTHP)	Hexapoda (1HEXAQ)	Insecta (1INSEC)		Hemiptera (1HEMIO)	Sternorrhyncha (1STERR)	Aphididae (1APHIF)		Eulachnus (1EULAG)	Pinus	1945	1940	Native to parts of Europe (Kloet and Hincks 1945)	Carter et al 1987; Kloet and hincks 1945	2		EULAAG
Eulachnus brevipilosus			Animalia (1ANIMK)	Arthropoda (1ARTHP)	Hexapoda (1HEXAQ)	Insecta (1INSEC)		Hemiptera (1HEMIO)	Sternorrhyncha (1STERR)	Aphididae (1APHIF)		Eulachnus (1EULAG)	Pinus	1960	1973		Carter et al 1987; Browne 1968	2
Euura atra			Animalia (1ANIMK)	Arthropoda (1ARTHP)	Hexapoda (1HEXAQ)	Insecta (1INSEC)		Hymenoptera (1HYMEO)		Tenthredinidae (1TENTF)		Euura (1EUURG)	Salix, Populus	1945	1968	Native to parts of Europe (Kloet and Hincks 1945)	Browne 1968; Kloet and Hincks 1945; Liston et al. 2014	2		EUURAT
Fenusa dohrnii	Fenusa dohrni		Animalia (1ANIMK)	Arthropoda (1ARTHP)	Hexapoda (1HEXAQ)	Insecta (1INSEC)		Hymenoptera (1HYMEO)		Tenthredinidae (1TENTF)		Fenusa (1FENUG)	Alnus	1945	1968	Native to parts of Europe (Kloet and Hincks 1945)	Browne 1968; Kloet and Hincks 1945; Liston et al. 2014	2		FENUDO
Fenusa pusilla			Animalia (1ANIMK)	Arthropoda (1ARTHP)	Hexapoda (1HEXAQ)	Insecta (1INSEC)		Hymenoptera (1HYMEO)		Tenthredinidae (1TENTF)		Fenusa (1FENUG)	Betula	1945	1968	Native to parts of Europe (Kloet and Hincks 1945)	Browne 1968; Kloet and Hincks 1945; Liston et al. 2014	2		FENUPU
Fenusella nana	Messa nana		Animalia (1ANIMK)	Arthropoda (1ARTHP)	Hexapoda (1HEXAQ)	Insecta (1INSEC)		Hymenoptera (1HYMEO)		Tenthredinidae (1TENTF)			Betula	1968	1968		Browne 1968; Liston et al. 2014	2
Fomitopsis betulina	Piptoporus betulinus	(Bull.) B.K. Cui, M.L. Han & Y.C. Dai,	Fungi (1FUNGK)	Basidiomycota (1BASIP)		Agaricomycotina (1BASIC)	Agaricomycetes (1AGARL)	Polyporales (1PORIO)		Fomitopsidaceae (1FOMIF)		Fomitopsis (1FOMIG)	Betula	1791	1856		Muskett and Malone 1980; Ward et al 1993	2
Fomitopsis pinicola		(Sw.) P. Karst. (1881);	Fungi (1FUNGK)	Basidiomycota (1BASIP)		Agaricomycotina (1BASIC)	Agaricomycetes (1AGARL)	Polyporales (1PORIO)		Fomitopsidaceae (1FOMIF)		Fomitopsis (1FOMIG)		1938	1910		Muskett and Malone 1980	2		FOMEPI
Fusarium avenaceum			Fungi (1FUNGK)	Ascomycota (1ASCOP)	Pezizomycotina (1PEZIQ)	Sordariomycetes (1SORDC)	Hypocreomycetidae (1HYPRL)	Hypocreales (1HYPRO)		Nectriaceae (1NECTF)		Gibberella (1GIBBG)	Pinus		1938		Muskett and Malone 1985	2		GIBBAV
Fusarium lateritium			Fungi (1FUNGK)	Ascomycota (1ASCOP)	Pezizomycotina (1PEZIQ)	Sordariomycetes (1SORDC)	Hypocreomycetidae (1HYPRL)	Hypocreales (1HYPRO)		Nectriaceae (1NECTF)		Gibberella (1GIBBG)	Buxus	1971	absent		Jones and Baker 2007			GIBBBA
Galerucella lineola			Animalia (1ANIMK)	Arthropoda (1ARTHP)	Hexapoda (1HEXAQ)	Insecta (1INSEC)		Coleoptera (1COLEO)		Chrysomelidae (1CHRYF)		Pyrrhalta (1PYRTG)		1930	1893	Native to parts of Europe (Kloet and Hincks 1945)	Johnson et al 1893	2		GALELI
Ganoderma applanatum		(Pers.) Pat. (1887);	Fungi (1FUNGK)	Basidiomycota (1BASIP)		Agaricomycotina (1BASIC)	Agaricomycetes (1AGARL)	Polyporales (1PORIO)		Ganodermataceae (1GANOF)		Ganoderma (1GANOG)	Fagus, Picea, Laburnum	1853	1804	Native (Ireland)	Muskett and Malone 1980; Ward et al 1993; Horgan et al 2004; FRDBI	2		GANOZO																												Recorded
Ganoderma australe		(Fr.) Pat. (1889);	Fungi (1FUNGK)	Basidiomycota (1BASIP)		Agaricomycotina (1BASIC)	Agaricomycetes (1AGARL)	Polyporales (1PORIO)		Ganodermataceae (1GANOF)		Ganoderma (1GANOG)		1913	1986		FRDBI; Ward et al 1993	2
Ganoderma resinaceum		Boud. (1890);	Fungi (1FUNGK)	Basidiomycota (1BASIP)		Agaricomycotina (1BASIC)	Agaricomycetes (1AGARL)	Polyporales (1PORIO)		Ganodermataceae (1GANOF)		Ganoderma (1GANOG)		1872	1931		Muskett and Malone 1980	2
Gibberella pulicaris	Fusarium sambucinum		Fungi (1FUNGK)	Ascomycota (1ASCOP)	Pezizomycotina (1PEZIQ)	Sordariomycetes (1SORDC)	Hypocreomycetidae (1HYPRL)	Hypocreales (1HYPRO)		Nectriaceae (1NECTF)		Gibberella (1GIBBG)	Salix	1840	1893		Muskett and Malone 1983; FRDBI	2		GIBBPU
Gilpinia hercyniac			Animalia (1ANIMK)	Arthropoda (1ARTHP)	Hexapoda (1HEXAQ)	Insecta (1INSEC)		Hymenoptera (1HYMEO)					Picea	1906	Absent		Browne 1968; Billany and Brown 1977	2	quarantine
Globisporangium ultimum	Pythium debaryanum; Globisporangium debaryanum	(R. Hesse) Uzuhashi, Tojo & Kakish.,	Chromista (1CHROK)	Pseudofungi (1PSDFP)		Oomycetes (1OOMYC)		Pythiales (1PYTHO)		Pythiaceae (1PYTHF)		Pythium (1PYTHG)	Larix, Pinus, Nothofagus	1899	1888	Native (Ireland)	Ward et al 1993; Muskett and Malone 1984; FRDBI	2		PYTHUL
Glomerella cingulata	Physalospora miyabeana; Glomerella miyabeana		Fungi (1FUNGK)	Ascomycota (1ASCOP)	Pezizomycotina (1PEZIQ)	Sordariomycetes (1SORDC)	Sordariomycetidae (1SRDAL)	Phyllachorales (1PHYRO)		Glomerellaceae (1GLOMF)		Glomerella (rejected name) (1GLOMG)	Salix	1855	1954	Non-native to Europe (Santini et al. 2013)	Muskett and Malone 1983; FRDBI	2		GLOMCI
Gremmeniella abietina	Crumenula pinea, Scleroderris lagerbergii, Brunchorista destructans	(Lagerberg) Morelet	Fungi (1FUNGK)	Ascomycota (1ASCOP)	Pezizomycotina (1PEZIQ)	Leotiomycetes (1LETOC)		Helotiales (1HELOO)		Helotiaceae (1HELOF)		Gremmeniella (1GREMG)		1926	2011	Native to parts of Europe (Santini et al. 2013)	See government reports; McAree and Mackenzie 1993; Peace 1962; DEFRA 2020	2	quarantine	GREMAB
Grifola frondosa		(Dicks.) Gray (1821);	Fungi (1FUNGK)	Basidiomycota (1BASIP)		Agaricomycotina (1BASIC)	Agaricomycetes (1AGARL)	Polyporales (1PORIO)		Meripilaceae (1MERIF)		Grifola (1GRIFG)		1831	1844	Native (Ireland)	Muskett and Malone 1980; Ward et al 1993; FRDBI	2		GRIFFR
Guignardia aesculi	Phyllosticta paviae		Fungi (1FUNGK)	Ascomycota (1ASCOP)	Pezizomycotina (1PEZIQ)	Dothideomycetes (1DOTHC)		Botryosphaeriales (1BOTSO)		Phyllostictaceae (1PHYCF)		Phyllosticta (1PHYSG)	Aesculus	1935	1968	Non-native to Europe (Santini et al. 2013)	FRDBI, R O'Hanlon 2015	4		GUIGAE
Gymnopus fusipes	Collybia fusipes		Fungi (1FUNGK)	Basidiomycota (1BASIP)		Agaricomycotina (1BASIC)	Agaricomycetes (1AGARL)	Agaricales (1AGARO)		Marasmiaceae (1MARAF)		Gymnopus (1GYMUG)	Quercus	1865	1804	Native (Ireland)	Muskett and Malone 1980	2		COLYFU
Gymnosporangium asiaticum	Gymnosporangium haraearum		Fungi (1FUNGK)	Basidiomycota (1BASIP)		Pucciniomycotina (1TELIC)	Pucciniomycetes (1PUCCL)	Pucciniales (1UREDO)		Pucciniaceae (1PUCCF)		Gymnosporangium (1GYMNG)	Juniperus	1974	1974	Non-native to Europe	See governemtn reports; FRDBI	2		GYMNAS
Gymnosporangium clavariaeforme			Fungi (1FUNGK)	Basidiomycota (1BASIP)		Pucciniomycotina (1TELIC)	Pucciniomycetes (1PUCCL)	Pucciniales (1UREDO)		Pucciniaceae (1PUCCF)		Gymnosporangium (1GYMNG)	Crataegus, Juniperus	1878	1837	Native (Ireland)	FRDBI ; Muskett and Malone 1980	2	Quarantine												Recorded
Gymnosporangium cornutum	Gymnosporangium juniperi		Fungi (1FUNGK)	Basidiomycota (1BASIP)		Pucciniomycotina (1TELIC)	Pucciniomycetes (1PUCCL)	Pucciniales (1UREDO)		Pucciniaceae (1PUCCF)		Gymnosporangium (1GYMNG)	Sorbus, Juniperus	1809	1852	Native (Ireland)	Muskett and Malone 1980; FRDBI	2	Quarantine	GYMNJU
Gymnosporangium fuscum			Fungi (1FUNGK)	Basidiomycota (1BASIP)		Pucciniomycotina (1TELIC)	Pucciniomycetes (1PUCCL)	Pucciniales (1UREDO)		Pucciniaceae (1PUCCF)		Gymnosporangium (1GYMNG)	Juniperus	1905	1840	Native (Ireland)	Muskett and Malone 1980; FRDBI	2		GYMNFU
Gypsonoma aceriana			Animalia (1ANIMK)	Arthropoda (1ARTHP)	Hexapoda (1HEXAQ)	Insecta (1INSEC)		Lepidoptera (1LEPIO)		Tortricidae (1TORTF)		Gypsonoma (1GYPSG)	Populus	1945	1996	Native to parts of Europe (Kloet and Hincks 1945)	PlantWise; Kloet and Hincks 1945	2		GYPSAC
Harpiphorus lepidus			Animalia (1ANIMK)	Arthropoda (1ARTHP)	Hexapoda (1HEXAQ)	Insecta (1INSEC)		Hymenoptera (1HYMEO)		Tenthredinidae (1TENTF)			Quercus	1945	1948	Native to parts of Europe (Kloet and Hincks 1945)	Graham 1948; Kloet and Hincks 1945	2
Helicobasidium purpureum		(Tul.) Pat. (1885);	Fungi (1FUNGK)	Basidiomycota (1BASIP)		Pucciniomycotina (1TELIC)	Pucciniomycetes (1PUCCL)	Platygloeales (1PLAGO)		Platygloeaceae (1PLAGF)		Helicobasidium (1HLCBG)	Pinus contorta, Picea, Abies, Pseudotsuga menziesii	1864	1957		FRDBI; McKay and Clear 1957; Mushett and Malone 1980	2		HLCBBR																								Recorded	Recorded		Recorded
Hemichroa australis			Animalia (1ANIMK)	Arthropoda (1ARTHP)	Hexapoda (1HEXAQ)	Insecta (1INSEC)		Hymenoptera (1HYMEO)		Tenthredinidae (1TENTF)		Hemichroa (1HEMHG)	Alnus	1940	1976		Speigh and Moller 1979; NBN atlas; Liston et al. 2014	2		HEMHAU
Hemichroa crocea			Animalia (1ANIMK)	Arthropoda (1ARTHP)	Hexapoda (1HEXAQ)	Insecta (1INSEC)		Hymenoptera (1HYMEO)		Tenthredinidae (1TENTF)		Hemichroa (1HEMHG)	Alnus, Betula	1945	1968	Native to parts of Europe (Kloet and Hincks 1945)	Browne 1968; Kloet and Hincks 1945; Liston et al. 2014	2		HEMHCR
Heterarthrus aceris		Kaltenbach, 1856	Animalia (1ANIMK)	Arthropoda (1ARTHP)	Hexapoda (1HEXAQ)	Insecta (1INSEC)		Hymenoptera (1HYMEO)		Tenthredinidae (1TENTF)		Heterarthrus (1HETAG)	Acer	1945	1987	Native to parts of Europe (Kloet and Hincks 1945)	Liston 1988; Kloet and Hincks 1945; Liston et al. 2014	2		HETAAC
Heterarthrus vagans			Animalia (1ANIMK)	Arthropoda (1ARTHP)	Hexapoda (1HEXAQ)	Insecta (1INSEC)		Hymenoptera (1HYMEO)		Tenthredinidae (1TENTF)		Heterarthrus (1HETAG)	Alnus	1945	1968	Native to parts of Europe (Kloet and Hincks 1945)	Browne 1968; Kloet and Hincks 1945; Liston et al. 2014	2		HETAVA
Heterobasidion annosum	Fomes annosus, Oedocephalum lineatum	(Fr.) Bref.,	Fungi (1FUNGK)	Basidiomycota (1BASIP)		Agaricomycotina (1BASIC)	Agaricomycetes (1AGARL)	Russulales (1RUSSO)		Bondarzewiaceae (1BONDF)		Heterobasidion (1HETEG)	Nothofagus, Prunus, Chamaecyparis, Tsuga, Larix, Picea, Pseudotsuga, Pinus	1859	1836	Native (Ireland)	Quirke 1946; Horgan et al. 2004; See government reports, de Brit Forest research review 1957-1964	2		HETEAN							Recorded			Recorded		Recorded		Recorded	Recorded	Recorded	Recorded	Recorded	Recorded			Recorded		Recorded	Recorded	Recorded	Recorded
Hylastes angustatus			Animalia (1ANIMK)	Arthropoda (1ARTHP)	Hexapoda (1HEXAQ)	Insecta (1INSEC)		Coleoptera (1COLEO)		Scolytidae (1SCOLF)		Hylastes (1HYASG)		1917	absent	Native to parts of Europe (Kloet and Hincks 1945); Native to Ireland (Reilly 2008)	Munro 1917; Reilly 2008			HYASAN
Hylastes ater			Animalia (1ANIMK)	Arthropoda (1ARTHP)	Hexapoda (1HEXAQ)	Insecta (1INSEC)		Coleoptera (1COLEO)		Scolytidae (1SCOLF)		Hylastes (1HYASG)		1800	Absent	Native to Ireland (Quirke 1947; Reilly 2008); Native to parts of Europe (Kloet and Hincks 1945)	Reilly 2008			HYASAR
Hylastes brunneus	Hylastes ater		Animalia (1ANIMK)	Arthropoda (1ARTHP)	Hexapoda (1HEXAQ)	Insecta (1INSEC)		Coleoptera (1COLEO)		Scolytidae (1SCOLF)		Hylastes (1HYASG)		1901	1854		Johnson and Halpert 1900; Forbes 1910; O Connor et al 1991; NBN atlas	2		HYASAR
Hylastes cunicularius			Animalia (1ANIMK)	Arthropoda (1ARTHP)	Hexapoda (1HEXAQ)	Insecta (1INSEC)		Coleoptera (1COLEO)		Scolytidae (1SCOLF)		Hylastes (1HYASG)		1917	1991		O Connor et al 1991; Munro 1917	2		HYASCU
Hylastes opacus			Animalia (1ANIMK)	Arthropoda (1ARTHP)	Hexapoda (1HEXAQ)	Insecta (1INSEC)		Coleoptera (1COLEO)		Scolytidae (1SCOLF)		Hylastes (1HYASG)		1917	1947	Native Ireland (Quirke 1947)	Quirke 1947; Munro 1917	2		HYASOP
Hylesinus crenatus			Animalia (1ANIMK)	Arthropoda (1ARTHP)	Hexapoda (1HEXAQ)	Insecta (1INSEC)		Coleoptera (1COLEO)		Scolytidae (1SCOLF)		Hylesinus (1HYESG)	Fraxinus	1888	1910	Non-native to Ireland (Quirke 1947)	Forbes 1910; NBN Atlas	2		HYESCR
Hylesinus fraxinii	Hylesium fraxini, Leperisinus varius		Animalia (1ANIMK)	Arthropoda (1ARTHP)	Hexapoda (1HEXAQ)	Insecta (1INSEC)		Coleoptera (1COLEO)		Scolytidae (1SCOLF)		Hylesinus (1HYESG)	Fraxinus	1884	1893	Non-native to Ireland (Quirke 1947)	Anon 1884 as cited in Elwes and Henry 1909; Johnson and Halpert 1900; Forbes 1910; NBN Atlas	2
Hylobius abietis			Animalia (1ANIMK)	Arthropoda (1ARTHP)	Hexapoda (1HEXAQ)	Insecta (1INSEC)		Coleoptera (1COLEO)		Curculionidae (1CURCF)		Hylobius (1HYLOG)	Pinus, Picea, Larix, Pseudotsuga	1848	1890	Native to parts of Europe (Kloet and Hincks 1945); Native to Ireland (Quirke 1947)	Johnson and Halbert 1900; See governemnt reports, de Brit Forest research review 1957-1965; NBN Atlas; Carpenter 1902, 1904, 1906, 1907	2		HYLOAB			Recorded	Recorded														Recorded			Recorded			Recorded			Recorded
Hylurgops palliatus	Hylastes palliatus		Animalia (1ANIMK)	Arthropoda (1ARTHP)	Hexapoda (1HEXAQ)	Insecta (1INSEC)		Coleoptera (1COLEO)		Scolytidae (1SCOLF)		Hylurgops (1HYLUG)	Picea, Larix, Pinus	1848	1895	Native to parts of Europe (Kloet and Hincks 1945); Native to Ireland (Quirke 1947)	Johnson and Halpert 1900; Forbes 1910; O Connor et al. 1991; NBN Atlas	2		HYLUPA
Hymenoscyphus fraxineus	Chalara fraxinea		Fungi (1FUNGK)	Ascomycota (1ASCOP)	Pezizomycotina (1PEZIQ)	Leotiomycetes (1LETOC)		Helotiales (1HELOO)		Helotiaceae (1HELOF)		Hymenoscyphus (1HMSCG)	Fraxinus	2012	2012	Non-native to Europe (Santini et al. 2013)	EPPO 2020b	1		CHAAFR
Hyponectria cookeana	Anisostomula cookeana		Fungi (1FUNGK)	Ascomycota (1ASCOP)	Pezizomycotina (1PEZIQ)	Sordariomycetes (1SORDC)	Xylariomycetidae (1XYLAL)						Quercus	1970	1936		Muskett and Malone 1983; FRDBI	2
Hysterographium fraxini			Fungi (1FUNGK)	Ascomycota (1ASCOP)	Pezizomycotina (1PEZIQ)	Dothideomycetes (1DOTHC)		Hysteriales (1HYSTO)		Hysteriaceae (1HYSTF)		Hysterographium (1HYSGG)	Fraxinus	1798	1884	Native (Ireland)	Muskett and Malone 1983; FRDBI	2		HYSGFR
Inonotus hispidus	Polyporus hispidus		Fungi (1FUNGK)	Basidiomycota (1BASIP)		Agaricomycotina (1BASIC)	Agaricomycetes (1AGARL)	Hymenochaetales (1HYMCO)		Hymenochaetaceae (1HYMCF)		Inonotus (1INONG)	Fraxinus	1791	1878	Native (Ireland)	Muskett and Malone 1980	2		INONHI
Ips acuminatus			Animalia (1ANIMK)	Arthropoda (1ARTHP)	Hexapoda (1HEXAQ)	Insecta (1INSEC)		Coleoptera (1COLEO)		Scolytidae (1SCOLF)		Ips (1IPSXG)		1926	1981 (interception)	Native to parts of Europe (Kloet and Hincks 1945)	O’Connor & Nash, 1983; Munro 1926;	2	Quarantine	IPSXAC
Ips cembrae			Animalia (1ANIMK)	Arthropoda (1ARTHP)	Hexapoda (1HEXAQ)	Insecta (1INSEC)		Coleoptera (1COLEO)		Scolytidae (1SCOLF)		Ips (1IPSXG)	Larix	1955	Absent	Non-native to Britain and Ireland (Browne 1968)			Quarantine	IPSXCE
Ips sexdentatus			Animalia (1ANIMK)	Arthropoda (1ARTHP)	Hexapoda (1HEXAQ)	Insecta (1INSEC)		Coleoptera (1COLEO)		Scolytidae (1SCOLF)		Ips (1IPSXG)		1919	Absent	Native to Britain (Browne 1968); Native to parts of Europe (Kloet and Hincks 1945)	NBN atlas		Quarantine	IPSXSE
Ips typographus			Animalia (1ANIMK)	Arthropoda (1ARTHP)	Hexapoda (1HEXAQ)	Insecta (1INSEC)		Coleoptera (1COLEO)		Scolytidae (1SCOLF)		Ips (1IPSXG)	Picea	1945	1982 (interception)	Native to parts of Europe (Kloet and Hincks 1945)	Browne 1968; O Connor et al 1991; O'Connor and Nash 1982; kloet and hincks 1945	2	Quarantine	IPSXTY
Kabatina juniperi			Fungi (1FUNGK)	Ascomycota (1ASCOP)	Pezizomycotina (1PEZIQ)	Dothideomycetes (1DOTHC)	Dothideomycetidae (1DTHDL)	Dothideales (1DOTHO)		Dothioraceae (1DOTRF)		Kabatina (anamorphic genus) (1KABTG)	Cupressus macrocarpa, Cupressocyparis leylandii, Chamaecyparis lawsoniana	1970	1970	Non-native to Europe (Santini et al. 2013)	See government reports; Muskett and Malone 1985; Jones and Baker 2007	2		KABTJU
Korscheltellus fusconebulosa	Hepialus fusconebulosa		Animalia (1ANIMK)	Arthropoda (1ARTHP)	Hexapoda (1HEXAQ)	Insecta (1INSEC)		Lepidoptera (1LEPIO)						1600	1964	Native to parts of Europe (Kloet and Hincks 1945)	Baynes 1964; NBN Atlas	2
Lachnellula calycina	Dasyscypha calycina; Trichoscyphella calycina	(Schumach.) Sacc. (1889)	Fungi (1FUNGK)	Ascomycota (1ASCOP)	Pezizomycotina (1PEZIQ)	Leotiomycetes (1LETOC)		Helotiales (1HELOO)		Hyaloscyphaceae (1HYASF)		Lachnellula (1LCHNG)		1866	1878	Native (Ireland)	Muskett and Malone 1983; Quirke 1946	2
Lachnellula subtilissima	Naemaspora strobi	(Cooke) Dennis (1962);	Fungi (1FUNGK)	Ascomycota (1ASCOP)	Pezizomycotina (1PEZIQ)	Leotiomycetes (1LETOC)		Helotiales (1HELOO)		Hyaloscyphaceae (1HYASF)		Lachnellula (1LCHNG)		1880	1983		Annual report NI 1976; Ward et al 1993	2		LCHNSU
Lachnellula willkommii	Trichoscyphella willkommii; Peziza willkommii	(R. Hartig) Dennis (1962);	Fungi (1FUNGK)	Ascomycota (1ASCOP)	Pezizomycotina (1PEZIQ)	Leotiomycetes (1LETOC)		Helotiales (1HELOO)		Hyaloscyphaceae (1HYASF)		Lachnellula (1LCHNG)	Larix europea	1800	1840	Native to parts of Europe (Santini et al. 2013)	Elwes and Henry 1906; Muskett and Malone 1983; Ward et al 1993; Horgan et al. 2004; Oppermann 1923 as cited in Yde Anderson 1979	2		LCHNWI					Recorded																						Recorded		Recorded
Lachnus roboris			Animalia (1ANIMK)	Arthropoda (1ARTHP)	Hexapoda (1HEXAQ)	Insecta (1INSEC)		Hemiptera (1HEMIO)	Sternorrhyncha (1STERR)	Aphididae (1APHIF)		Lachnus (1LACNG)	Quercus	1960	1979		Carter et al 1987; Doncaster 1960 as cited in Day et al 1998	2		LACNRO
Laetiporus sulphureus	Polyporus sulphureus	(Bull.) Murrill,	Fungi (1FUNGK)	Basidiomycota (1BASIP)		Agaricomycotina (1BASIC)	Agaricomycetes (1AGARL)	Polyporales (1PORIO)		Fomitopsidaceae (1FOMIF)		Laetiporus (1LAETG)	Quercus	1786	1878	Native (Ireland)	Muskett and Malone 1980; Ward et al. 1993; Horgan et al. 2004	2		LAETSU
Lambdina fiscellaria			Animalia (1ANIMK)	Arthropoda (1ARTHP)	Hexapoda (1HEXAQ)	Insecta (1INSEC)		Lepidoptera (1LEPIO)		Geometridae (1GEOMF)
Lambertella corni-maris			Fungi (1FUNGK)	Ascomycota (1ASCOP)	Pezizomycotina (1PEZIQ)	Leotiomycetes (1LETOC)		Helotiales (1HELOO)		Rutstroemiaceae (1RUTSF)		Lambertella (1LMBTG)	Malus	1992	absent		Jones and Baker 2007			LMBTCM
Laothoe populi	Amorpha populi		Animalia (1ANIMK)	Arthropoda (1ARTHP)	Hexapoda (1HEXAQ)	Insecta (1INSEC)		Lepidoptera (1LEPIO)		Sphingidae (1SPHIF)		Laothoe (1LAOTG)	Populus, Salix, Alnus	1945	1968	Native to parts of Europe (Kloet and Hincks 1945)	Browne 1968, kloet and hincks 1945	2		AMORPO
Lecanosticta acicola			Fungi (1FUNGK)	Ascomycota (1ASCOP)	Pezizomycotina (1PEZIQ)	Dothideomycetes (1DOTHC)	Dothideomycetidae (1DTHDL)	Capnodiales (1CAPDO)		Mycosphaerellaceae (1MYCOF)		Lecanosticta (anamorphic genus) (1LCSTG)		1994	2016		Mullet et al. 2018; EPPO 2020a	1	RNQP	SCIRAC
Leptoglossus occidentalis			Animalia (1ANIMK)	Arthropoda (1ARTHP)	Hexapoda (1HEXAQ)	Insecta (1INSEC)		Hemiptera (1HEMIO)	Heteroptera (1HETER)	Coreidae (1COREF)		Leptoglossus (1LEPLG)	Conifers	2008	2010		Foley and McCormack 2013	1		LEPLOC
Lophodermella sulcigena	Hypodermium sulcigenum; Hypodermella sulcigena	(Link) Höhn.,	Fungi (1FUNGK)	Ascomycota (1ASCOP)	Pezizomycotina (1PEZIQ)	Leotiomycetes (1LETOC)		Rhytismatales (1RHYTO)		Rhytismataceae (1RHYTF)		Lophodermella (1LOPMG)		1967	1992	Native (Ireland)	Ward et al 1993	2		LOPMSU
Lophodermium pinastri		(Schrad.) Chevall. (1826);	Fungi (1FUNGK)	Ascomycota (1ASCOP)	Pezizomycotina (1PEZIQ)	Leotiomycetes (1LETOC)		Rhytismatales (1RHYTO)		Rhytismataceae (1RHYTF)		Lophodermium (1LOPHG)	Pinus contorta, Pinus sylvestris	1899	1840	Native (Ireland)	Adams and Pethybridge 1910; Muskett and Malone 1983; Ward et al 1993	2		LOPHPI			Recorded						Recorded		Recorded										Recorded	Recorded						Recorded	Recorded
Lophodermium seditiosum		Minter, Staley & Millar (1978);	Fungi (1FUNGK)	Ascomycota (1ASCOP)	Pezizomycotina (1PEZIQ)	Leotiomycetes (1LETOC)		Rhytismatales (1RHYTO)		Rhytismataceae (1RHYTF)		Lophodermium (1LOPHG)	Pinus	1932	1980		See government reports; Ward et al 1993	2		LOPHSE
Lymantria dispar			Animalia (1ANIMK)	Arthropoda (1ARTHP)	Hexapoda (1HEXAQ)	Insecta (1INSEC)		Lepidoptera (1LEPIO)		Erebidae (1EREBF)		Lymantria (1LYMAG)	Broadleaf	1995	2004	Native to parts of Europe or original British form gone extinct (Kloet and Hincks 1945)	Moths Ireland 2020	4		LYMADI
Lymantria monacha			Animalia (1ANIMK)	Arthropoda (1ARTHP)	Hexapoda (1HEXAQ)	Insecta (1INSEC)		Lepidoptera (1LEPIO)		Erebidae (1EREBF)		Lymantria (1LYMAG)		1984	2006	Native to parts of Europe (Kloet and Hincks 1945)	Bond et al. 2006; Carter 1984	2		LYMAMO
Macrophoma strobi	Diplodina strobi		Fungi (1FUNGK)	Ascomycota (1ASCOP)	Pezizomycotina (1PEZIQ)	Dothideomycetes (1DOTHC)		Botryosphaeriales (1BOTSO)		Botryosphaeriaceae (1BOTSF)			Pinus	1912	1975		See government reports; FRDBI	2
Magdalis armigera			Animalia (1ANIMK)	Arthropoda (1ARTHP)	Hexapoda (1HEXAQ)	Insecta (1INSEC)		Coleoptera (1COLEO)		Curculionidae (1CURCF)		Magdalis (1MAGDG)	ulmus	1945	1902	Native to parts of Europe (Kloet and Hincks 1945); Native to Britain (Morris 2002)	Halbert 1922; kloet and hincks 1945; Morris 2002	2		MAGDAR
Magdalis carbonaria			Animalia (1ANIMK)	Arthropoda (1ARTHP)	Hexapoda (1HEXAQ)	Insecta (1INSEC)		Coleoptera (1COLEO)		Curculionidae (1CURCF)		Magdalis (1MAGDG)	Betula	1945	1919	native (Kloet and Hincks 1945; morris 2002)	Halbert 1922; kloet and hincks 1945; Morris 2002	2		MAGDCA
Malacosoma neustria			Animalia (1ANIMK)	Arthropoda (1ARTHP)	Hexapoda (1HEXAQ)	Insecta (1INSEC)		Lepidoptera (1LEPIO)		Lasiocampidae (1LASIF)		Malacosoma (1MALAG)		1945	2001	Native to parts of Europe (Kloet and Hincks 1945)	O’Meara 2001; Bond et al. 2006; kloet and hincks 1945	2		MALANE
Mamianiella coryli			Fungi (1FUNGK)	Ascomycota (1ASCOP)	Pezizomycotina (1PEZIQ)	Sordariomycetes (1SORDC)	Sordariomycetidae (1SRDAL)	Diaporthales (1DIAPO)		Gnomoniaceae (1GNOMF)			Corylus	1978	Absent		Jones and Baker 2007
Marssonina kriegeriana	Marssonia kriegeriana	(Bres.) Magnus (1906);	Fungi (1FUNGK)	Ascomycota (1ASCOP)	Pezizomycotina (1PEZIQ)	Leotiomycetes (1LETOC)		Helotiales (1HELOO)					Salix	1937	1968		Grove 1937, as cited in Phillips and Burdekin 1982; Muskett and Malone 1985; Ward et al 1993	2
Marssonina betulae	Gloeosporium betulae	(Lib.) Magnus,	Fungi (1FUNGK)	Ascomycota (1ASCOP)	Pezizomycotina (1PEZIQ)	Leotiomycetes (1LETOC)		Helotiales (1HELOO)					Betula	1908	1935		Muskett and Malone 1985; FRDBI	2
Megastigmus pinus			Animalia (1ANIMK)	Arthropoda (1ARTHP)	Hexapoda (1HEXAQ)	Insecta (1INSEC)		Hymenoptera (1HYMEO)		Torymidae (1TORYF)		Megastigmus (1MEGSG)		1945	1982	Non-native to Europe (Kloet and Hincks 1945)	O’Connor et al. 2000; Browne 1968; kloet and hincks 1945	1		MEGSPI
Megastigmus spermotrophus			Animalia (1ANIMK)	Arthropoda (1ARTHP)	Hexapoda (1HEXAQ)	Insecta (1INSEC)		Hymenoptera (1HYMEO)		Torymidae (1TORYF)		Megastigmus (1MEGSG)	Pseudotsuga, Abies	1896	1945	Non-native to Britain (MacDougall 1906)	MacDougall 1906; Browne 1968; O’Connor et al. 2000; kloet and hincks 1945	1		MEGSSR
Megastigmus strobilobius			Animalia (1ANIMK)	Arthropoda (1ARTHP)	Hexapoda (1HEXAQ)	Insecta (1INSEC)		Hymenoptera (1HYMEO)		Torymidae (1TORYF)		Megastigmus (1MEGSG)	Picea, Abies		1910	Non-native to Britain and Ireland (Browne 1968)	O Connor 2003 INJ; Browne 1968	1		MEGSST
Melampsora amygdalinae			Fungi (1FUNGK)	Basidiomycota (1BASIP)		Pucciniomycotina (1TELIC)	Pucciniomycetes (1PUCCL)	Pucciniales (1UREDO)		Melampsoraceae (1MELMF)		Melampsora (1MELMG)	Salix	1966	1978		See government reports; FRDBI	2		MELMAM
Melampsora epitea			Fungi (1FUNGK)	Basidiomycota (1BASIP)		Pucciniomycotina (1TELIC)	Pucciniomycetes (1PUCCL)	Pucciniales (1UREDO)		Melampsoraceae (1MELMF)		Melampsora (1MELMG)	Salix	1865	1878	Native (Ireland)	FRDBI; Muskett and Malone 1980	2
Melampsora laricis-pentandrae			Fungi (1FUNGK)	Basidiomycota (1BASIP)		Pucciniomycotina (1TELIC)	Pucciniomycetes (1PUCCL)	Pucciniales (1UREDO)		Melampsoraceae (1MELMF)		Melampsora (1MELMG)	Salix	1975	1912		Muskett and Malone 1980	2		MELMLN
Melampsora laricis-populina			Fungi (1FUNGK)	Basidiomycota (1BASIP)		Pucciniomycotina (1TELIC)	Pucciniomycetes (1PUCCL)	Pucciniales (1UREDO)		Melampsoraceae (1MELMF)		Melampsora (1MELMG)	Populus deltoides	1880	1852	Native to parts of Europe (Santini et al. 2013)	Muskett and Malone 1980	2		MELMLP																												Recorded
Melampsora populnea	Melampsora pinitorqua		Fungi (1FUNGK)	Basidiomycota (1BASIP)		Pucciniomycotina (1TELIC)	Pucciniomycetes (1PUCCL)	Pucciniales (1UREDO)		Melampsoraceae (1MELMF)		Melampsora (1MELMG)	Populus	1838	1852		Muskett and Malone 1980; FRDBI	2		MELMPO
Melampsora salicis-albae			Fungi (1FUNGK)	Basidiomycota (1BASIP)		Pucciniomycotina (1TELIC)	Pucciniomycetes (1PUCCL)	Pucciniales (1UREDO)		Melampsoraceae (1MELMF)		Melampsora (1MELMG)	Salix	1865	1852	Native (Ireland)	Muskett and Malone 1980	2		MELMSA
Melampsorella caryophyllacearum	aecidium elatinum	(DC.) J. Schröt. (1874);	Fungi (1FUNGK)	Basidiomycota (1BASIP)		Pucciniomycotina (1TELIC)	Pucciniomycetes (1PUCCL)	Pucciniales (1UREDO)		Pucciniastraceae (1PUCIF)		Melampsorella (1MELRG)	Abies	1837	1902		Muskett and Malone 1980; FRDBI; Ward et al 1993; Fischer 1902	2		MELRCA
Melampsoridium betulinum	Melampsora betulinum, Melampsoridium hiratsukanum	(Pers.) Kleb. (1899);	Fungi (1FUNGK)	Basidiomycota (1BASIP)		Pucciniomycotina (1TELIC)	Pucciniomycetes (1PUCCL)	Pucciniales (1UREDO)		Pucciniastraceae (1PUCIF)		Melampsoridium (1MELDG)	Betula, Larix, Alnus	1797	1883	Non-native to Europe (Santini et al. 2013)	Lett 1885; Quirke 1947; Musakett and Malone 1980 Ward et al 1993; Horgan et al. 2004; Report of Minister of lands on forests 1966-1967, 1969-1970	2		MELDBE																						Recorded
Melanconis stilbostoma	Melanconium betulinum		Fungi (1FUNGK)	Ascomycota (1ASCOP)	Pezizomycotina (1PEZIQ)	Sordariomycetes (1SORDC)	Sordariomycetidae (1SRDAL)	Diaporthales (1DIAPO)					Betula	1900	1900		Muskett and Malone 1983; FRDBI ; Paulson 1900	2
Meloderma desmazieri	Hypoderma desmazieri		Fungi (1FUNGK)	Ascomycota (1ASCOP)	Pezizomycotina (1PEZIQ)	Leotiomycetes (1LETOC)		Rhytismatales (1RHYTO)		Rhytismataceae (1RHYTF)		Meloderma (1MEDMG)	Pinus	1905	1919		Muskett and Malone 1983; FRDBI	2		MLODDM
Melolontha hippocastani			Animalia (1ANIMK)	Arthropoda (1ARTHP)	Hexapoda (1HEXAQ)	Insecta (1INSEC)		Coleoptera (1COLEO)		Scarabaeidae (1SCARF)		Melolontha (1MELOG)		1945	1914	Native to parts of Europe (Kloet and Hincks 1945)	Bullock 1914; kloet and hincks 1945	2		MELOHI
Melolontha melolontha			Animalia (1ANIMK)	Arthropoda (1ARTHP)	Hexapoda (1HEXAQ)	Insecta (1INSEC)		Coleoptera (1COLEO)		Scarabaeidae (1SCARF)		Melolontha (1MELOG)	Quercus	1782	1920	Native to parts of Europe (Kloet and Hincks 1945)	PLantWise; NBN Atlas	2		MELOME																											Recorded
Mesoneura opaca			Animalia (1ANIMK)	Arthropoda (1ARTHP)	Hexapoda (1HEXAQ)	Insecta (1INSEC)		Hymenoptera (1HYMEO)		Tenthredinidae (1TENTF)			Quercus	1945	1968	Native to parts of Europe (Kloet and Hincks 1945)	Browne 1968; kloet and hincks 1945; Liston et al. 2014	2
Mikronegeria fagi			Fungi (1FUNGK)	Basidiomycota (1BASIP)		Pucciniomycotina (1TELIC)	Pucciniomycetes (1PUCCL)	Pucciniales (1UREDO)		Mikronegeriaceae (1MKNGF)		Mikronegeria (1MKNGG)	Fagus	1976	Absent		Jones and Baker 2007			MKNGFA
Milesina blechni			Fungi (1FUNGK)	Basidiomycota (1BASIP)		Pucciniomycotina (1TELIC)	Pucciniomycetes (1PUCCL)	Pucciniales (1UREDO)		Pucciniastraceae (1PUCIF)			Abies	1899	1931		Muskett and Malone 1980; FRDBI	2
Milesina kriegeriana			Fungi (1FUNGK)	Basidiomycota (1BASIP)		Pucciniomycotina (1TELIC)	Pucciniomycetes (1PUCCL)	Pucciniales (1UREDO)		Pucciniastraceae (1PUCIF)			Abies	1934	1934		Muskett and Malone 1980; FRDBI	2
Monilinia johnsonii			Fungi (1FUNGK)	Ascomycota (1ASCOP)	Pezizomycotina (1PEZIQ)	Leotiomycetes (1LETOC)		Helotiales (1HELOO)		Sclerotiniaceae (1SCLEF)		Monilinia (1MONIG)		1937	2001		FRDBI	4		MONIJO
Monochamus alternatus			Animalia (1ANIMK)	Arthropoda (1ARTHP)	Hexapoda (1HEXAQ)	Insecta (1INSEC)		Coleoptera (1COLEO)		Cerambycidae (1CERAF)		Monochamus (1MONCG)		Absent	2000 (interception)		Ashe et al. 2002	1	Quarantine	MONCAL
Monochamus scutellatus			Animalia (1ANIMK)	Arthropoda (1ARTHP)	Hexapoda (1HEXAQ)	Insecta (1INSEC)		Coleoptera (1COLEO)		Cerambycidae (1CERAF)		Monochamus (1MONCG)		Absent	1981 (interception)		O Connor et al 1983	2	Quarantine	MONCST
Monochamus sutor			Animalia (1ANIMK)	Arthropoda (1ARTHP)	Hexapoda (1HEXAQ)	Insecta (1INSEC)		Coleoptera (1COLEO)		Cerambycidae (1CERAF)		Monochamus (1MONCG)		1945	2017 (interception)	Native to parts of Europe (Kloet and Hincks 1945)	A. Murchie unpublished data; kloet and hincks 1945	3	Quarantine	MONCSU
Monsoma pulveratum	Monosoma pulverata; Monsoma pulverata		Animalia (1ANIMK)	Arthropoda (1ARTHP)	Hexapoda (1HEXAQ)	Insecta (1INSEC)		Hymenoptera (1HYMEO)		Tenthredinidae (1TENTF)			Alnus, Salix	1945	1921	Native to parts of Europe (Kloet and Hincks 1945)	Johnson 1922; kloet and hincks 1945; Liston et al. 2014	2
Naohidemyces vaccinii	Pucciniastrum vaccinii, Naohidemyces vacciniorum		Fungi (1FUNGK)	Basidiomycota (1BASIP)		Pucciniomycotina (1TELIC)	Pucciniomycetes (1PUCCL)	Pucciniales (1UREDO)		Pucciniastraceae (1PUCIF)		Naohidemyces (1NAOHG)	Tsuga	1865	1883	Native (Ireland)	Muskett and Malone 1980;FRDBI	2		NAOHVA
Nectria cinnabarina		(Tode) Fr. (1849);	Fungi (1FUNGK)	Ascomycota (1ASCOP)	Pezizomycotina (1PEZIQ)	Sordariomycetes (1SORDC)	Hypocreomycetidae (1HYPRL)	Hypocreales (1HYPRO)		Nectriaceae (1NECTF)		Nectria (1NECTG)	Fraxinus, Acer, Sorbus, Aesculus	1800	1867	Native (Ireland)	Muskett and Malone 1983; FRDBI; Ward et al 1993	2		NECTCI			Recorded		Recorded																	Recorded
Nematinus acuminatus			Animalia (1ANIMK)	Arthropoda (1ARTHP)	Hexapoda (1HEXAQ)	Insecta (1INSEC)		Hymenoptera (1HYMEO)		Tenthredinidae (1TENTF)			Corylus, Betula	1945	1968	Native to parts of Europe (Kloet and Hincks 1945)	Browne 1968; kloet and hincks 1945; Liston et al. 2014	2
Nematinus fuscipennis	Nematinus abdominalis		Animalia (1ANIMK)	Arthropoda (1ARTHP)	Hexapoda (1HEXAQ)	Insecta (1INSEC)		Hymenoptera (1HYMEO)		Tenthredinidae (1TENTF)			Alnus	1968	1968		Moller 1975; Browne 1968; Liston et al. 2014	2
Nematinus luteus			Animalia (1ANIMK)	Arthropoda (1ARTHP)	Hexapoda (1HEXAQ)	Insecta (1INSEC)		Hymenoptera (1HYMEO)		Tenthredinidae (1TENTF)			Alnus	1945	1968	Native to parts of Europe (Kloet and Hincks 1945)	Browne 1968; kloet and hincks 1945; Liston et al. 2014	2
Nematus bergmanni			Animalia (1ANIMK)	Arthropoda (1ARTHP)	Hexapoda (1HEXAQ)	Insecta (1INSEC)		Hymenoptera (1HYMEO)		Tenthredinidae (1TENTF)		Pteronidea (1PTRDG)	Salix	1968	1968		Browne 1968; Liston et al. 2014	2
Nematus hypoxanthus			Animalia (1ANIMK)	Arthropoda (1ARTHP)	Hexapoda (1HEXAQ)	Insecta (1INSEC)		Hymenoptera (1HYMEO)		Tenthredinidae (1TENTF)		Pteronidea (1PTRDG)	Salix, Poulus	1968	1968		Browne 1968; Liston et al. 2014	2
Nematus jugicola			Animalia (1ANIMK)	Arthropoda (1ARTHP)	Hexapoda (1HEXAQ)	Insecta (1INSEC)		Hymenoptera (1HYMEO)		Tenthredinidae (1TENTF)		Pteronidea (1PTRDG)	Salix	1968	1968		Browne 1968	2
Nematus leionotus			Animalia (1ANIMK)	Arthropoda (1ARTHP)	Hexapoda (1HEXAQ)	Insecta (1INSEC)		Hymenoptera (1HYMEO)		Tenthredinidae (1TENTF)		Pteronidea (1PTRDG)	Betula	1968	1968		Browne 1968; Liston et al. 2014	2
Nematus melanaspis	nematus maculiger; Pteronus melanapsis		Animalia (1ANIMK)	Arthropoda (1ARTHP)	Hexapoda (1HEXAQ)	Insecta (1INSEC)		Hymenoptera (1HYMEO)		Tenthredinidae (1TENTF)		Pteronidea (1PTRDG)	Populus, Salix, Betula	1945	1907	Native to parts of Europe (Kloet and Hincks 1945)	Carpenter 1908; Browne 1968; Kloet and Hincks 1945	2
Nematus melanocephalus			Animalia (1ANIMK)	Arthropoda (1ARTHP)	Hexapoda (1HEXAQ)	Insecta (1INSEC)		Hymenoptera (1HYMEO)		Tenthredinidae (1TENTF)		Pteronidea (1PTRDG)	Populus, Ulmus, Betula, Salix	1968	1968		Browne 1968; Liston et al. 2014	2		PTRDML
Nematus miliaris			Animalia (1ANIMK)	Arthropoda (1ARTHP)	Hexapoda (1HEXAQ)	Insecta (1INSEC)		Hymenoptera (1HYMEO)		Tenthredinidae (1TENTF)		Pteronidea (1PTRDG)	Salix, Populus	1968	1968		Browne 1968; Liston et al. 2014	2
Nematus nigricornis			Animalia (1ANIMK)	Arthropoda (1ARTHP)	Hexapoda (1HEXAQ)	Insecta (1INSEC)		Hymenoptera (1HYMEO)		Tenthredinidae (1TENTF)		Pteronidea (1PTRDG)	Populus, Salix	1968	1968		Browne 1968; Liston et al. 2014	2
Nematus oligospilus			Animalia (1ANIMK)	Arthropoda (1ARTHP)	Hexapoda (1HEXAQ)	Insecta (1INSEC)		Hymenoptera (1HYMEO)		Tenthredinidae (1TENTF)		Nematus (1NEMAG)	Salix	1968	1968		Browne 1968; Liston et al. 2014	2		NEMAOI
Nematus pavidus			Animalia (1ANIMK)	Arthropoda (1ARTHP)	Hexapoda (1HEXAQ)	Insecta (1INSEC)		Hymenoptera (1HYMEO)		Tenthredinidae (1TENTF)		Nematus (1NEMAG)		1968	1968		Browne 1968; Liston et al. 2014	2		NEMAPA
Nematus polyspilus			Animalia (1ANIMK)	Arthropoda (1ARTHP)	Hexapoda (1HEXAQ)	Insecta (1INSEC)		Hymenoptera (1HYMEO)		Tenthredinidae (1TENTF)		Nematus (1NEMAG)	Alnus	1968	1968		Browne 1968	2
Nematus salicis			Animalia (1ANIMK)	Arthropoda (1ARTHP)	Hexapoda (1HEXAQ)	Insecta (1INSEC)		Hymenoptera (1HYMEO)		Tenthredinidae (1TENTF)		Nematus (1NEMAG)	Salix, Populus	1968	1968		Browne 1968	2		NEMASA
Nematus viridis			Animalia (1ANIMK)	Arthropoda (1ARTHP)	Hexapoda (1HEXAQ)	Insecta (1INSEC)		Hymenoptera (1HYMEO)		Tenthredinidae (1TENTF)		Nematus (1NEMAG)	Betula	1968	1968		Browne 1968; Liston et al. 2014	2
Neodiprion sertifer			Animalia (1ANIMK)	Arthropoda (1ARTHP)	Hexapoda (1HEXAQ)	Insecta (1INSEC)		Hymenoptera (1HYMEO)		Diprionidae (1DIPRF)		Neodiprion (1NEODG)	Pinus	1920	1965	Native to parts of Europe (Kloet and Hincks 1945)	Speigh and Moller 1979 INJ; see government reports, de Brit Forest research review 1964-1970; Carter and Winter 1998 Christmas tree pests; Bevan 1977 For Comm	2		NEODSE		Recorded	Recorded	Recorded														Recorded			Recorded			Recorded			Recorded
Neolentinus lepideus	Lentinus lepideus		Fungi (1FUNGK)	Basidiomycota (1BASIP)		Agaricomycotina (1BASIC)	Agaricomycetes (1AGARL)	Polyporales (1PORIO)		Polyporaceae (1POLPF)		Neolentinus (1NLNTG)	Picea abies	1881	2000		Muskett and Malone 1980; FRDBI	2		NLNTLE																													Recorded
Neonectria coccinea	nectria coccinea		Fungi (1FUNGK)	Ascomycota (1ASCOP)	Pezizomycotina (1PEZIQ)	Sordariomycetes (1SORDC)	Hypocreomycetidae (1HYPRL)	Hypocreales (1HYPRO)		Nectriaceae (1NECTF)		Neonectria (1NNECG)	Fagus	1789	1884	Native (Ireland)	Muskett and Malone 1983; FRDBI	2
Neonectria ditissima	Nectria ditissima, Nectria galligena	(Tul. & C. Tul.) Samuels & Rossman (2006)	Fungi (1FUNGK)	Ascomycota (1ASCOP)	Pezizomycotina (1PEZIQ)	Sordariomycetes (1SORDC)	Hypocreomycetidae (1HYPRL)	Hypocreales (1HYPRO)		Nectriaceae (1NECTF)		Neonectria (1NNECG)	Fagus, Fraxinus	1922	1902		Muskett and Malone 1983; Quirke 1946	2	RNQP	NECTGA																													Recorded
Neonectria fuckeliana	Nectria canker, Spruce canker		Fungi (1FUNGK)	Ascomycota (1ASCOP)	Pezizomycotina (1PEZIQ)	Sordariomycetes (1SORDC)	Hypocreomycetidae (1HYPRL)	Hypocreales (1HYPRO)		Nectriaceae (1NECTF)		Corinectria (1CRNCG)	Picea sitchensis	1924	2017		O'Hanlon and Fleming 2018	2		NECTFU
Neonectria neomacrospora			Fungi (1FUNGK)	Ascomycota (1ASCOP)	Pezizomycotina (1PEZIQ)	Sordariomycetes (1SORDC)	Hypocreomycetidae (1HYPRL)	Hypocreales (1HYPRO)		Nectriaceae (1NECTF)		Corinectria (1CRNCG)	Abies	1959	absent		EPPO 2020b
Nicrophorus vespillo			Animalia (1ANIMK)	Arthropoda (1ARTHP)	Hexapoda (1HEXAQ)	Insecta (1INSEC)		Coleoptera (1COLEO)						1907	2002		IE EU forest health survey 2002; NBN atlas	3
Niphades tubericollis			Animalia (1ANIMK)	Arthropoda (1ARTHP)	Hexapoda (1HEXAQ)	Insecta (1INSEC)								absent	2000 (interception)		Ashe et al 2002	1
Operophtera brumata			Animalia (1ANIMK)	Arthropoda (1ARTHP)	Hexapoda (1HEXAQ)	Insecta (1INSEC)		Lepidoptera (1LEPIO)		Geometridae (1GEOMF)		Operophtera (1OPERG)		1945	1968	Native to parts of Europe (Kloet and Hincks 1945)	Browne 1968; Bond et al. 2006; kloet and hincks 1945	1		CHEIBR
Ophiostoma novo-ulmi		Brasier (1991);	Fungi (1FUNGK)	Ascomycota (1ASCOP)	Pezizomycotina (1PEZIQ)	Sordariomycetes (1SORDC)	Sordariomycetidae (1SRDAL)	Ophiostomatales (1OPHIO)		Ophiostomataceae (1OPHIF)		Ophiostoma (1OPHSG)	Ulmus	1965	1977	Non-native to Ireland	Walsh and Mangan 1977	2		OPHSNU
Ophiostoma piceae	Ceratocystis piceae; Pesotum piceae		Fungi (1FUNGK)	Ascomycota (1ASCOP)	Pezizomycotina (1PEZIQ)	Sordariomycetes (1SORDC)	Sordariomycetidae (1SRDAL)	Ophiostomatales (1OPHIO)		Ophiostomataceae (1OPHIF)		Ophiostoma (1OPHSG)	Pinus	1923	1924	Non-native to Europe (Santini et al. 2013)	Muskett and Malone 1983; FRDBI	2		CERAPC
Ophiostoma ulmi	Ceratocystis ulmi	(Buisman) Nannf.,	Fungi (1FUNGK)	Ascomycota (1ASCOP)	Pezizomycotina (1PEZIQ)	Sordariomycetes (1SORDC)	Sordariomycetidae (1SRDAL)	Ophiostomatales (1OPHIO)		Ophiostomataceae (1OPHIF)		Ophiostoma (1OPHSG)	Ulmus	1922	1958	Non-native to Europe (Santini et al. 2013)	Mangan and Walsh 1980; Ward et al 1993	2		CERAUL
Orgyia antique			Animalia (1ANIMK)	Arthropoda (1ARTHP)	Hexapoda (1HEXAQ)	Insecta (1INSEC)		Lepidoptera (1LEPIO)		Erebidae (1EREBF)				1945	1904	Native to parts of Europe (Kloet and Hincks 1945)	Carpetenter 1905; O’Meara 2001; Bond et al. 2006; kloet and hincks 1945	1
Otiorhynchus singularis	Otiorrhynchus picipes		Animalia (1ANIMK)	Arthropoda (1ARTHP)	Hexapoda (1HEXAQ)	Insecta (1INSEC)		Coleoptera (1COLEO)		Curculionidae (1CURCF)		Otiorhynchus (1OTIOG)		1945	1947	Native to parts of Europe (Kloet and Hincks 1945)	Browne 1968; Blackith & Blackith, 1986; Quirke 1947; Kloet and Hincks 1945	2		OTIOSI
Otiorhynchus sulcatus			Animalia (1ANIMK)	Arthropoda (1ARTHP)	Hexapoda (1HEXAQ)	Insecta (1INSEC)		Coleoptera (1COLEO)		Curculionidae (1CURCF)		Otiorhynchus (1OTIOG)		1945	2002	Native to parts of Europe (Kloet and Hincks 1945)	Kloet and Hincks 1945; IE EU Forest health survey 2002	2		OTIOSU
Ovulinia azaleae			Fungi (1FUNGK)	Ascomycota (1ASCOP)	Pezizomycotina (1PEZIQ)	Leotiomycetes (1LETOC)		Helotiales (1HELOO)		Sclerotiniaceae (1SCLEF)		Ovulinia (1OVULG)	Rhododendron	1970	1972		Scannell 1972	3		OVULAZ
Pachypappa vesicalis	Pachypappella piceae, Rhizomaria piceae		Animalia (1ANIMK)	Arthropoda (1ARTHP)	Hexapoda (1HEXAQ)	Insecta (1INSEC)		Hemiptera (1HEMIO)	Sternorrhyncha (1STERR)	Aphididae (1APHIF)		Pachypappa (1PACAG)	Picea sitchensis, Larix, Pinus	1945	1968	Native to parts of Europe (Kloet and Hincks 1945)	Kloet and Hincks 1945, Browne 1968	2		PAPPVE
Pacynematus scutellatus			Animalia (1ANIMK)	Arthropoda (1ARTHP)	Hexapoda (1HEXAQ)	Insecta (1INSEC)		Hymenoptera (1HYMEO)		Tenthredinidae (1TENTF)			Picea, Abies	1945	1968	Non-native to Europe (Kloet and Hincks 1945)	Browne 1968; Kloet and Hincks 1945; Liston et al. 2014	2
Pamphilius pallipes			Animalia (1ANIMK)	Arthropoda (1ARTHP)	Hexapoda (1HEXAQ)	Insecta (1INSEC)		Hymenoptera (1HYMEO)		Pamphiliidae			Betula	1945	1968	Native to parts of Europe (Kloet and Hincks 1945)	Browne 1968; Kloet and Hincks 1945	2
Pamphilius varius			Animalia (1ANIMK)	Arthropoda (1ARTHP)	Hexapoda (1HEXAQ)	Insecta (1INSEC)		Hymenoptera (1HYMEO)		Pamphiliidae			Betula	1945	1968	Native to parts of Europe (Kloet and Hincks 1945)	Browne 1968; Kloet and Hincks 1945	2
Panolis flammea	pine beauty moth		Animalia (1ANIMK)	Arthropoda (1ARTHP)	Hexapoda (1HEXAQ)	Insecta (1INSEC)		Lepidoptera (1LEPIO)		Noctuidae (1NOCTF)		Panolis (1PANLG)	Pinus	1800	1936	Native to parts of Europe (Kloet and Hincks 1945); Native to UK (Bevan 1987)	Donovan 1936, as cited in Baynes 1964; Forest Service NI 1990 as cited in Thompson and Nelson 2006, Butterly and moth NI; NBN Atlas	2		PANLFL
Paranthrene tabaniformis			Animalia (1ANIMK)	Arthropoda (1ARTHP)	Hexapoda (1HEXAQ)	Insecta (1INSEC)		Lepidoptera (1LEPIO)		Sesiidae (1SESIF)		Paranthrene (1PARHG)	Populus	1945	1995	Native to parts of Europe (Kloet and Hincks 1945)	PlantWise; Kloet and Hincks 1945	2		PARHTA
Paropsisterna selmani			Animalia (1ANIMK)	Arthropoda (1ARTHP)	Hexapoda (1HEXAQ)	Insecta (1INSEC)		Coleoptera (1COLEO)		Chrysomelidae (1CHRYF)		Paropsisterna (1PSISG)	Eucalyptus	2015	2007		Fanning and Bars 2013; DEFRA 2020	1		PSISSE
Parthenolecanium persicae			Animalia (1ANIMK)	Arthropoda (1ARTHP)	Hexapoda (1HEXAQ)	Insecta (1INSEC)		Hemiptera (1HEMIO)	Sternorrhyncha (1STERR)	Coccidae (1COCCF)		Parthenolecanium (1PRTLG)		1900	1979		PlantWise; CABI	3		LECAPE
Peribatodes rhomboidaria	Cleoa rhomboidaria		Animalia (1ANIMK)	Arthropoda (1ARTHP)	Hexapoda (1HEXAQ)	Insecta (1INSEC)		Lepidoptera (1LEPIO)		Geometridae (1GEOMF)		Peribatodes (1PERBG)		1800	1937		MothsIreland; brc.ac.uk	4		BOARRH
Periclista albida			Animalia (1ANIMK)	Arthropoda (1ARTHP)	Hexapoda (1HEXAQ)	Insecta (1INSEC)		Hymenoptera (1HYMEO)		Tenthredinidae (1TENTF)			Quercus	1945	1968	Native to parts of Europe (Kloet and Hincks 1945)	Browne 1968; Kloet and Hincks 1945; Liston et al. 2014	2
Pestalotiopsis funerea		(Desm.) Steyaert (1949);	Fungi (1FUNGK)	Ascomycota (1ASCOP)	Pezizomycotina (1PEZIQ)	Sordariomycetes (1SORDC)	Xylariomycetidae (1XYLAL)	Amphisphaeriales (1AMPSO)		Amphisphaeriaceae (1AMPSF)		Pestalotiopsis (anamorphic genus) (1PESPG)	Cupressocyparis leylandii, Thuja, Cuppressus macrocarpa	1885	1918		Muskett and Malone 1985; Ward et al 1993; FRDBI	2		PESPFU
Pestalotiopsis guepinii	Pestalotia macrotricha		Fungi (1FUNGK)	Ascomycota (1ASCOP)	Pezizomycotina (1PEZIQ)	Sordariomycetes (1SORDC)	Xylariomycetidae (1XYLAL)	Amphisphaeriales (1AMPSO)		Amphisphaeriaceae (1AMPSF)		Pestalotiopsis (anamorphic genus) (1PESPG)	Rhododendron	1923	1911	Unknown if native to Europe (Santini et al. 2013)	Muskett and Malone 1985	2		PESTGU
Pestalotiopsis palmarum			Fungi (1FUNGK)	Ascomycota (1ASCOP)	Pezizomycotina (1PEZIQ)	Sordariomycetes (1SORDC)	Xylariomycetidae (1XYLAL)	Amphisphaeriales (1AMPSO)		Amphisphaeriaceae (1AMPSF)		Pestalotiopsis (anamorphic genus) (1PESPG)	Chamaerops	1988	Absent		Jones and Baker 2007			PESPPA
Phaeochora steinheilii			Fungi (1FUNGK)	Ascomycota (1ASCOP)	Pezizomycotina (1PEZIQ)	Sordariomycetes (1SORDC)	Sordariomycetidae (1SRDAL)	Phyllachorales (1PHYRO)		Phaeochoraceae (1PHCOF)		Phaeochora (1PHCOG)	Chamaerops	1999	Absent		Jones and Baker 2007			PHCOST
Phaeocryptopus gaeumannii	Phaecocryptus gaumanii , Adelopus gaeumannii	(T. Rohde) Petr.,	Fungi (1FUNGK)	Ascomycota (1ASCOP)	Pezizomycotina (1PEZIQ)	Dothideomycetes (1DOTHC)	Dothideomycetidae (1DTHDL)	Capnodiales (1CAPDO)		Mycosphaerellaceae (1MYCOF)		Nothophaeocryptopus (1NTHPG)	Pseudotsuga	1928	1928	Non-native to Europe (Santini et al. 2013)	Muskett and Malone 1983; Clear 1951; Horgan et al. 2004	2		PHARGA			Recorded
Phaeolus schweinitzii		(Fr.) Pat. (1900)	Fungi (1FUNGK)	Basidiomycota (1BASIP)		Agaricomycotina (1BASIC)	Agaricomycetes (1AGARL)	Polyporales (1PORIO)		Polyporaceae (1POLPF)		Phaeolus (1PAEOG)		1850	1927		Muskett and Malone 1980; Ward et al 1993; O'Hanlon and Harrington 2012	1		PAEOSC
Phaeotremella fagi	cryptococcus fagisuga; Tremella foliacea	(Middelhoven & Scorzetti) A.M. Yurkov & T. Boekhout	Fungi (1FUNGK)	Basidiomycota	Agaricomycotina	Tremellomycetes		Tremellales		Tremellaceae			Fagus sylvatica, Fraxinus excelsior	1835	1968		See government reports; FRDBI	2
Phalera bucephala	Pygaera buciphala		Animalia (1ANIMK)	Arthropoda (1ARTHP)	Hexapoda (1HEXAQ)	Insecta (1INSEC)		Lepidoptera (1LEPIO)		Notodontidae (1NOTOF)		Phalera (1PHALG)	Quercus, Salix, Ulmus; Tilia	1945	1908	Native to parts of Europe (Kloet and Hincks 1945)	Browne 1968; Kloet and Hincks 1945; Carpenter 1909	2		PHALBU
Phlebiopsis gigantea	Peniophora gigantea		Fungi (1FUNGK)	Basidiomycota (1BASIP)		Agaricomycotina (1BASIC)	Agaricomycetes (1AGARL)	Polyporales (1PORIO)		Phanerochaetaceae (1PHNEF)		Phlebiopsis (1PLBSG)		1881	1929		Muskett and Malone 1980; FRDBI	2		PHANGI
Phomopsis oncostoma			Fungi (1FUNGK)	Ascomycota (1ASCOP)	Pezizomycotina (1PEZIQ)	Sordariomycetes (1SORDC)	Sordariomycetidae (1SRDAL)	Diaporthales (1DIAPO)						1940	2001		IE EU Forest health survey 2002; FRDBI	3
Phratora vitellinae	Phyllodecta vitellinae		Animalia (1ANIMK)	Arthropoda (1ARTHP)	Hexapoda (1HEXAQ)	Insecta (1INSEC)		Coleoptera (1COLEO)		Chrysomelidae (1CHRYF)		Phratora (1PHRRG)		1948	1923		Jansen 1924; Kloet and Hincks 1945	2		PHRRVI
Phratora vulgatissima	Phyllodecta vulgatissima		Animalia (1ANIMK)	Arthropoda (1ARTHP)	Hexapoda (1HEXAQ)	Insecta (1INSEC)		Coleoptera (1COLEO)		Chrysomelidae (1CHRYF)		Phratora (1PHRRG)	Salix, Populus	1948	1906		Carpenter 1906; Nicholson 1914; Kloet and Hincks 1945; Browne 1968	2		PHRRVU
Phyllactinia guttata			Fungi (1FUNGK)	Ascomycota (1ASCOP)	Pezizomycotina (1PEZIQ)	Leotiomycetes (1LETOC)		Erysiphales (1ERYSO)		Erysiphaceae (1ERYSF)		Phyllactinia (1PHYLG)	Fraxinus, Fagus, Corylus	1888	1874	Native (Ireland)	Muskett and Malone 1983; PlantWise; FRDBI	2		PHYLGU
Phyllaphis fagi			Animalia (1ANIMK)	Arthropoda (1ARTHP)	Hexapoda (1HEXAQ)	Insecta (1INSEC)		Hemiptera (1HEMIO)	Sternorrhyncha (1STERR)	Aphididae (1APHIF)		Phyllaphis (1PHYAG)	Fagus	1945	1947	Native to parts of Europe (Kloet and Hincks 1945)	Quirke 1947; Browne 1968; Kloet and Hincks 1945	2		PHYAFA
Phyllobius argentatus			Animalia (1ANIMK)	Arthropoda (1ARTHP)	Hexapoda (1HEXAQ)	Insecta (1INSEC)		Coleoptera (1COLEO)		Curculionidae (1CURCF)		Phyllobius (1PLLBG)		1884	1900	Native to parts of Europe (Kloet and Hincks 1945)	Johnson and Halbert 1900; NBN Atlas	2		PLLBAG
Phyllobius glaucus			Animalia (1ANIMK)	Arthropoda (1ARTHP)	Hexapoda (1HEXAQ)	Insecta (1INSEC)		Coleoptera (1COLEO)		Curculionidae (1CURCF)		Phyllobius (1PLLBG)			2002		IE EU forest health survey 2002	3
Phyllobius parvulus			Animalia (1ANIMK)	Arthropoda (1ARTHP)	Hexapoda (1HEXAQ)	Insecta (1INSEC)		Coleoptera (1COLEO)		Curculionidae (1CURCF)		Phyllobius (1PLLBG)	Quercus	1945	1968	Native to parts of Europe (Kloet and Hincks 1945)	Browne 1968; Kloet and Hincks 1945	2
Phyllobius pyri			Animalia (1ANIMK)	Arthropoda (1ARTHP)	Hexapoda (1HEXAQ)	Insecta (1INSEC)		Coleoptera (1COLEO)		Curculionidae (1CURCF)		Phyllobius (1PLLBG)	Betula, Populus	1945	1966	Native to parts of Europe (Kloet and Hincks 1945)	Morris 1966; Browne 1968; Kloet and Hincks 1945	2		PLLBPI
Phyllobius viridiaeris			Animalia (1ANIMK)	Arthropoda (1ARTHP)	Hexapoda (1HEXAQ)	Insecta (1INSEC)		Coleoptera (1COLEO)		Curculionidae (1CURCF)		Phyllobius (1PLLBG)		1945	1947	Native to parts of Europe (Kloet and Hincks 1945)	Kloet and Hincks 1945	2
Phyllocolpa carnifrons	Phyllocolpa excavata		Animalia (1ANIMK)	Arthropoda (1ARTHP)	Hexapoda (1HEXAQ)	Insecta (1INSEC)		Hymenoptera (1HYMEO)		Tenthredinidae (1TENTF)			Salix	1968	1968		Browne 1968; Liston et al. 2014	2
Phyllocolpa leucapsis			Animalia (1ANIMK)	Arthropoda (1ARTHP)	Hexapoda (1HEXAQ)	Insecta (1INSEC)		Hymenoptera (1HYMEO)		Tenthredinidae (1TENTF)			Salix	1968	1968		Browne 1968; Liston et al. 2014	2
Phyllocolpa leucosticta			Animalia (1ANIMK)	Arthropoda (1ARTHP)	Hexapoda (1HEXAQ)	Insecta (1INSEC)		Hymenoptera (1HYMEO)		Tenthredinidae (1TENTF)			Salix	1968	1968		Browne 1968; Liston et al. 2014	2
Phyllosticta aquifolina			Fungi (1FUNGK)	Ascomycota (1ASCOP)	Pezizomycotina (1PEZIQ)	Dothideomycetes (1DOTHC)		Botryosphaeriales (1BOTSO)		Phyllostictaceae			Ilex	1935	1978		See government reports; FRDBI	2
Physalacria cryptomeriae			Fungi (1FUNGK)	Basidiomycota	Agaricomycotina	Agaricomycetes	Agaricomycetidae	Agaricales		Physalacriaceae			Cryptomeria	1975	Absent		Jones and Baker 2007
Phytophthora × alni	Phytophthora alni subsp. alni	(Brasier & S.A. Kirk) Husson, Ioos & Aguayo	Chromista (1CHROK)	Pseudofungi (1PSDFP)		Oomycetes (1OOMYC)		Peronosporales (1PEROO)		Peronosporaceae (1PEROF)		Phytophthora (1PHYTG)	Alnus	1993	2015	Cryptic EU (Santini et al. 2013)	O'Hanlon et al. 2016; Jones and Baker 2007	1
Phytophthora × multiformis	Phytophthora alni subsp. multiformis	(Brasier & S.A. Kirk) Husson, Ioos & Aguayo	Chromista (1CHROK)	Pseudofungi (1PSDFP)		Oomycetes (1OOMYC)		Peronosporales (1PEROO)		Peronosporaceae (1PEROF)		Phytophthora (1PHYTG)	Alnus	1993	2001	Cryptic EU (Santini et al. 2013)	Fennessy 2012; Turok et al. (2002); Clancy and Hamilton 2001, O'Hanlon et al. 2016; CABI Plantwise	3
Phytophthora austrocedri			Chromista (1CHROK)	Pseudofungi (1PSDFP)		Oomycetes (1OOMYC)		Peronosporales (1PEROO)		Peronosporaceae (1PEROF)		Phytophthora (1PHYTG)	Juniperis	2011	Absent					PHYTAU
Phytophthora cactorum		(Lebert & Cohn) J. Schröt. 1886	Chromista (1CHROK)	Pseudofungi (1PSDFP)		Oomycetes (1OOMYC)		Peronosporales (1PEROO)		Peronosporaceae (1PEROF)		Phytophthora (1PHYTG)	Abies, Sorbus, Malus	1915	1930	Cryptic EU (Santini et al. 2013)	Muskett et al. 1931; Kavanagh and Rath 1982; O'Hanlon et al. 2016; CABI Plantwise	1	RNQP	PHYTCC
Phytophthora cambivora		(Petri) Buisman 1927	Chromista (1CHROK)	Pseudofungi (1PSDFP)		Oomycetes (1OOMYC)		Peronosporales (1PEROO)		Peronosporaceae (1PEROF)		Phytophthora (1PHYTG)	Castanea, Acer	1930	1995	Non-native to Europe (Santini et al. 2013)	Shafhizadeh and Kavanagh 2005; O'Hanlon et al. 2016; Horgan et al. 2004; CABI Plantwise	1	RNQP	PHYTCM
Phytophthora chlamydospora			Chromista (1CHROK)	Pseudofungi (1PSDFP)		Oomycetes (1OOMYC)		Peronosporales (1PEROO)		Peronosporaceae (1PEROF)		Phytophthora (1PHYTG)	Rhododendron	1971	2015		O'Hanlon et al. 2016	1		PHYTCH
Phytophthora cinnamomi		Rands 1922	Chromista (1CHROK)	Pseudofungi (1PSDFP)		Oomycetes (1OOMYC)		Peronosporales (1PEROO)		Peronosporaceae (1PEROF)		Phytophthora (1PHYTG)	Castanea, Cotoneaster, Erica, Berberis, Calluna, Pieris, Osmanthus, Ceanothus, Vinca, Rhododendron, Chamaecyparis lawsoniana, Juniperus, Cuppressus, Azalea, Erica	1934	1969	Non-native to Europe (Santini et al. 2013)	Muskett and Malone 1974; S. O'Brien pers. Comm., Shafhizadeh and Kavanagh 2005; O'Hanlon et al. 2016; Horgan et al. 2004; Jones and Baker 2007; CABI Plantwise	1	RNQP	PHYTCN
Phytophthora cryptogea		Pethybr. & Laff. 1919	Chromista (1CHROK)	Pseudofungi (1PSDFP)		Oomycetes (1OOMYC)		Peronosporales (1PEROO)		Peronosporaceae (1PEROF)		Phytophthora (1PHYTG)	Chrysanthemum	1933	1926	Cryptic EU (Santini et al. 2013)	Muskett et al. 1931; S. O'Brien pers comm., Shafhizadeh and Kavanagh 2005; O'Hanlon et al. 2016; CABI Plantwise	1	RNQP	PHYTCR
Phytophthora gonapodyides		(H.E. Petersen) Buisman 1927	Chromista (1CHROK)	Pseudofungi (1PSDFP)		Oomycetes (1OOMYC)		Peronosporales (1PEROO)		Peronosporaceae (1PEROF)		Phytophthora (1PHYTG)	Fagus	1932	2014	Cryptic EU (Santini et al. 2013)	O'Hanlon et al. 2016; FRDBI	1		PHYTGO
Phytophthora hibernalis		Carne 1925	Chromista (1CHROK)	Pseudofungi (1PSDFP)		Oomycetes (1OOMYC)		Peronosporales (1PEROO)		Peronosporaceae (1PEROF)		Phytophthora (1PHYTG)	Chamaecyparis	1975	2012	Cryptic EU (Santini et al. 2013)	B. McGuinness pers. Comm.; O'Hanlon et al. 2016; Jones and Baker 2007	1		PHYTHI
Phytophthora ilicis		Buddenh. & Roy A. Young (1957)	Chromista (1CHROK)	Pseudofungi (1PSDFP)		Oomycetes (1OOMYC)		Peronosporales (1PEROO)		Peronosporaceae (1PEROF)		Phytophthora (1PHYTG)	Ilex	1989	absent	Cryptic EU (Santini et al. 2013)	Jones and Baker 2007			PHYTIL
Phytophthora inflata		Caros. & Tucker (1949)	Chromista (1CHROK)	Pseudofungi (1PSDFP)		Oomycetes (1OOMYC)		Peronosporales (1PEROO)		Peronosporaceae (1PEROF)		Phytophthora (1PHYTG)	Sambucus	1991	absent	Cryptic EU (Santini et al. 2013)	Jones and Baker 2007			PHYTIF
Phytophthora inundata		Brasier, Sánch. Hern. & S.A. Kirk (2003)	Chromista (1CHROK)	Pseudofungi (1PSDFP)		Oomycetes (1OOMYC)		Peronosporales (1PEROO)		Peronosporaceae (1PEROF)		Phytophthora (1PHYTG)		1970	absent	Cryptic EU (Santini et al. 2013)				PHYTID
Phytophthora kernoviae		Brasier, Beales & S.A. Kirk 2005	Chromista (1CHROK)	Pseudofungi (1PSDFP)		Oomycetes (1OOMYC)		Peronosporales (1PEROO)		Peronosporaceae (1PEROF)		Phytophthora (1PHYTG)		2003	2008	Non-native to Europe (Santini et al. 2013)	EPPO 2020b; Brennan et al. 2010; O'Hanlon et al. 2016; Brasier et al. 2005; Jones and Baker 2007; CABI Plantwise	1		PHYTKE
Phytophthora lacustris			Chromista (1CHROK)	Pseudofungi (1PSDFP)		Oomycetes (1OOMYC)		Peronosporales (1PEROO)		Peronosporaceae (1PEROF)		Phytophthora (1PHYTG)		1972	2015		O'Hanlon et al. 2016 ; Nechwetal et al. 2013	1		PHYTLC
Phytophthora lateralis		Tucker & Milbrath 1942	Chromista (1CHROK)	Pseudofungi (1PSDFP)		Oomycetes (1OOMYC)		Peronosporales (1PEROO)		Peronosporaceae (1PEROF)		Phytophthora (1PHYTG)	Chamaecyparis	2010	2011	Non-native to Europe	Green et al. 2013; See government reports; EPPO 2020b; Horgan et al. 2004; CABI Plantwise	1		PHYTLA
Phytophthora megasperma		Drechsler 1931	Chromista (1CHROK)	Pseudofungi (1PSDFP)		Oomycetes (1OOMYC)		Peronosporales (1PEROO)		Peronosporaceae (1PEROF)		Phytophthora (1PHYTG)	Conifers	1936	1929	Cryptic EU (Santini et al. 2013)	Cairns and Muskett 1933 nature; Muskett and Malone 1974, Shafhizadeh and Kavanagh 2005; CABI Plantwise	1		PHYTME
Phytophthora plurivora			Chromista (1CHROK)	Pseudofungi (1PSDFP)		Oomycetes (1OOMYC)		Peronosporales (1PEROO)		Peronosporaceae (1PEROF)		Phytophthora (1PHYTG)		1937	2009		S. O'Brien pers. Comm.; O'Hanlon et al. 2016	1		PHYTPU
Phytophthora pseudosyringae		T. Jung & Delatour	Chromista (1CHROK)	Pseudofungi (1PSDFP)		Oomycetes (1OOMYC)		Peronosporales (1PEROO)		Peronosporaceae (1PEROF)		Phytophthora (1PHYTG)	Fagus, Nothofagus	1938	2012	Cryptic EU (Santini et al. 2013)	McCracken 2013; O'Hanlon et al. 2016	1		PHYTPS
Phytophthora ramorum		Werres, De Cock & Man in 't Veld 2001	Chromista (1CHROK)	Pseudofungi (1PSDFP)		Oomycetes (1OOMYC)		Peronosporales (1PEROO)		Peronosporaceae (1PEROF)		Phytophthora (1PHYTG)	Quercus	2002	2002	Non-native to Europe (Santini et al. 2013)	EPPO 2020b; Brennan et al. 2010; O'Hanlon et al. 2016; Jones and Baker 2007; CABI Plantwise	1	quarantine	PHYTRA
Phytophthora siskiyouebsis			Chromista (1CHROK)	Pseudofungi (1PSDFP)		Oomycetes (1OOMYC)		Peronosporales (1PEROO)		Peronosporaceae (1PEROF)		Phytophthora (1PHYTG)	Alnus	2014	Absent
Phytophthora syringae		(Kleb.) Kleb. 1909	Chromista (1CHROK)	Pseudofungi (1PSDFP)		Oomycetes (1OOMYC)		Peronosporales (1PEROO)		Peronosporaceae (1PEROF)		Phytophthora (1PHYTG)		1930	1922	Cryptic EU (Santini et al. 2013)	Mcardel and Laferty 1922; Muskett and Malone 1984, S. O'Brien pers. Com., Kavanagh et al 1969; O'Hanlon et al. 2016	1		PHYTSY
Phytophthora uniformis	Phytophthora alni subsp. uniformis		Chromista (1CHROK)	Pseudofungi (1PSDFP)		Oomycetes (1OOMYC)		Peronosporales (1PEROO)		Peronosporaceae (1PEROF)		Phytophthora (1PHYTG)	Alnus	1993	2015		O' Hanlon et al. 2016	1		PHYTUN
Pineus pini	Adelges pini		Animalia (1ANIMK)	Arthropoda (1ARTHP)	Hexapoda (1HEXAQ)	Insecta (1INSEC)		Hemiptera (1HEMIO)	Sternorrhyncha (1STERR)	Adelgidae (1ADLGF)		Pineus (1PINEG)	Pinus	1937	1946	Native to parts of Europe (Kloet and Hincks 1945); Native to Ireland (Quirke 1947)	Quirke 1946; PlantWise; Browne 1968	2		PINEPI
Pissodes castaneus	Pissodes notatus		Animalia (1ANIMK)	Arthropoda (1ARTHP)	Hexapoda (1HEXAQ)	Insecta (1INSEC)		Coleoptera (1COLEO)		Curculionidae (1CURCF)		Pissodes (1PISOG)		1945	1996	Native to parts of Europe (Kloet and Hincks 1945); Exotic to Britain (Morris 2002)	Coillte Annual report 1996, 1997; Browne 1968; Kloet and Hincks 1945	2		PISONO
Pissodes pini			Animalia (1ANIMK)	Arthropoda (1ARTHP)	Hexapoda (1HEXAQ)	Insecta (1INSEC)		Coleoptera (1COLEO)		Curculionidae (1CURCF)		Pissodes (1PISOG)		1918	2006	Native to parts of Europe (Kloet and Hincks 1945); Non-native to Britain (Morris 2002)	Forestry Comission 1920; Clawson and Anderson 2006	1		PISOPN
Pityogenes bidentatus			Animalia (1ANIMK)	Arthropoda (1ARTHP)	Hexapoda (1HEXAQ)	Insecta (1INSEC)		Coleoptera (1COLEO)		Scolytidae (1SCOLF)		Pityogenes (1PITYG)	Pinus	1848	1892	Native to parts of Europe (Kloet and Hincks 1945)	Johnson and Halbert 1900; Forbes 1910; NBN Atlas	2		PITYBD
Pityogenes chalcographus			Animalia (1ANIMK)	Arthropoda (1ARTHP)	Hexapoda (1HEXAQ)	Insecta (1INSEC)		Coleoptera (1COLEO)		Scolytidae (1SCOLF)		Pityogenes (1PITYG)	Pinus	1945	1931 (interception)	Native to parts of Europe (Kloet and Hincks 1945)	O Connor and Nash 1983; O Connor et al. 1991; Kloet and Hincks 1945	2		PITYCH
Pityogenes quadridens			Animalia (1ANIMK)	Arthropoda (1ARTHP)	Hexapoda (1HEXAQ)	Insecta (1INSEC)		Coleoptera (1COLEO)		Scolytidae (1SCOLF)		Pityogenes (1PITYG)		1945	1983 (interception)	Native to parts of Europe (Kloet and Hincks 1945)	O Connor and Nash 1983; O Connor et al. 1991; Kloet and Hincks 1945	2		PITYQU
Pityophagus ferrugineus			Animalia (1ANIMK)	Arthropoda (1ARTHP)	Hexapoda (1HEXAQ)	Insecta (1INSEC)		Coleoptera (1COLEO)						1945	2009	Native to parts of Europe (Kloet and Hincks 1945)	Kloet and Hincks 1945; See government reports	2
Pityophthorus pubescens			Animalia (1ANIMK)	Arthropoda (1ARTHP)	Hexapoda (1HEXAQ)	Insecta (1INSEC)		Coleoptera (1COLEO)		Scolytidae (1SCOLF)		Pityophthorus (1PITOG)	Pinus	1800	1854	Native to parts of Europe (Kloet and Hincks 1945)	Johnson and Halpert 1900; Forbes 1910; NBN Atlas	2		PITOPB
Plagiodera versicolora			Animalia (1ANIMK)	Arthropoda (1ARTHP)	Hexapoda (1HEXAQ)	Insecta (1INSEC)		Coleoptera (1COLEO)		Chrysomelidae (1CHRYF)		Plagiodera (1PLAGG)		1945	1898	Native to parts of Europe (Kloet and Hincks 1945)	Halbert, 1898; Kloet and Hincks 1945	2		PLAGVE
Plagiostoma salicellum	Cryptodiaporthe salicella		Fungi (1FUNGK)	Ascomycota (1ASCOP)	Pezizomycotina (1PEZIQ)	Sordariomycetes (1SORDC)	Sordariomycetidae (1SRDAL)	Diaporthales (1DIAPO)		Gnomoniaceae (1GNOMF)		Plagiostoma (1PLGTG)	Salix	1885	1912	Native (Ireland)	Muskett and Malone 1983	2		CRYDSA
Podosphaera clandestina	Podosphaera oxyacanthae; Podosphaera clandestina var. clandestina		Fungi (1FUNGK)	Ascomycota (1ASCOP)	Pezizomycotina (1PEZIQ)	Leotiomycetes (1LETOC)		Erysiphales (1ERYSO)		Erysiphaceae (1ERYSF)		Podosphaera (1PODOG)	Crataegus, Sorbus	1887	1978		Muskett and Malone 1983; FRDBI	2		PODOCL
Podosphaera volkartii			Fungi (1FUNGK)	Ascomycota (1ASCOP)	Pezizomycotina (1PEZIQ)	Leotiomycetes (1LETOC)		Erysiphales (1ERYSO)		Erysiphaceae (1ERYSF)		Podosphaera (1PODOG)	Dryas	1977	Absent		Jones and Baker 2007
Pontania bridgmannii			Animalia (1ANIMK)	Arthropoda (1ARTHP)	Hexapoda (1HEXAQ)	Insecta (1INSEC)		Hymenoptera (1HYMEO)		Tenthredinidae (1TENTF)		Pontania (1PONTG)	Salix	1945	1968	Native to parts of Europe (Kloet and Hincks 1945)	Browne 1968; Kloet and Hincks 1945; Liston et al. 2014	2
Pontania pedunculi			Animalia (1ANIMK)	Arthropoda (1ARTHP)	Hexapoda (1HEXAQ)	Insecta (1INSEC)		Hymenoptera (1HYMEO)		Tenthredinidae (1TENTF)		Pontania (1PONTG)	Salix	1945	1968	Native to parts of Europe (Kloet and Hincks 1945)	Browne 1968; Kloet and Hincks 1945; Liston et al. 2014	2		PONTPE
Pontania viminalis			Animalia (1ANIMK)	Arthropoda (1ARTHP)	Hexapoda (1HEXAQ)	Insecta (1INSEC)		Hymenoptera (1HYMEO)		Tenthredinidae (1TENTF)		Pontania (1PONTG)	Salix	1945	1968	Native to parts of Europe (Kloet and Hincks 1945)	Browne 1968; Kloet and Hincks 1945; Liston et al. 2014	2		PONTVI
Porodaedalea pini	Phellinus pini		Fungi (1FUNGK)	Basidiomycota (1BASIP)		Agaricomycotina (1BASIC)	Agaricomycetes (1AGARL)	Hymenochaetales (1HYMCO)		Hymenochaetaceae (1HYMCF)		Porodaedalea (1POROG)	Pinus	1900	1992		Mitchell et al. 2002	1		PHELPI
Prays fraxinella	Prays curtisellus		Animalia (1ANIMK)	Arthropoda (1ARTHP)	Hexapoda (1HEXAQ)	Insecta (1INSEC)		Lepidoptera (1LEPIO)		Yponomeutidae (1YPONF)		Prays (1PRAYG)		1879	1879	Native to parts of Europe (Kloet and Hincks 1945); Native to Ireland (Quirke 1947)	Anon 1879; Quirke 1947; Browne 1968; Bond et al. 2006; Kloet and Hincks 1945	1		PRAYCU
Pristiphora abietina			Animalia (1ANIMK)	Arthropoda (1ARTHP)	Hexapoda (1HEXAQ)	Insecta (1INSEC)		Hymenoptera (1HYMEO)		Tenthredinidae (1TENTF)		Pristiphora (1PRISG)	Picea	1945	1981	Non-native to Europe (Kloet and Hincks 1945)	Browne 1968 ; Kloet and Hincks 1945; Liston et al. 2014	2		PRISAB
Pristiphora aphantoneura	Pristiphora fulvipes		Animalia (1ANIMK)	Arthropoda (1ARTHP)	Hexapoda (1HEXAQ)	Insecta (1INSEC)		Hymenoptera (1HYMEO)		Tenthredinidae (1TENTF)		Pristiphora (1PRISG)	Salix	1945	1968	Native to parts of Europe (Kloet and Hincks 1945)	Browne 1968 ; Kloet and Hincks 1945; Liston et al. 2014	2
Pristiphora cincta	Pristiphora quercus		Animalia (1ANIMK)	Arthropoda (1ARTHP)	Hexapoda (1HEXAQ)	Insecta (1INSEC)		Hymenoptera (1HYMEO)		Tenthredinidae (1TENTF)		Pristiphora (1PRISG)	Betula, Vaccinium	1945	1968	Native to parts of Europe (Kloet and Hincks 1945)	Browne 1968 ; Kloet and Hincks 1945; Liston et al. 2014	2
Pristiphora erichsonii	Lygaeonematus erichsoni, Nematus erichsonii		Animalia (1ANIMK)	Arthropoda (1ARTHP)	Hexapoda (1HEXAQ)	Insecta (1INSEC)		Hymenoptera (1HYMEO)		Tenthredinidae (1TENTF)		Pristiphora (1PRISG)	Larix	1906	1906	Non-native to Ireland (Quirke 1947); Non-native to parts of Europe (Kloet and Hincks 1945)	MacDougal 1906a; Browne 1968; Liston and Sheppard 2008; PlantWise; Quirke 1947; Liston et al. 2014	1		PRISER
Pristiphora laricis			Animalia (1ANIMK)	Arthropoda (1ARTHP)	Hexapoda (1HEXAQ)	Insecta (1INSEC)		Hymenoptera (1HYMEO)		Tenthredinidae (1TENTF)		Pristiphora (1PRISG)	Larix	1945	1968	Non-native to Europe (Kloet and Hincks 1945)	Browne 1968; Kloet and Hincks 1945; Liston et al. 2014	2		PRISLA
Pristiphora testacea			Animalia (1ANIMK)	Arthropoda (1ARTHP)	Hexapoda (1HEXAQ)	Insecta (1INSEC)		Hymenoptera (1HYMEO)		Tenthredinidae (1TENTF)		Pristiphora (1PRISG)		1945	2008	Native to parts of Europe (Kloet and Hincks 1945)	Liston and Sheppard 2008; Kloet and Hincks 1945; Liston et al. 2014	2
Pristiphora wesmaeli			Animalia (1ANIMK)	Arthropoda (1ARTHP)	Hexapoda (1HEXAQ)	Insecta (1INSEC)		Hymenoptera (1HYMEO)		Tenthredinidae (1TENTF)		Pristiphora (1PRISG)	Larix	1945	1968	Non-native to Europe (Kloet and Hincks 1945)	Browne 1968; Liston and Sheppard 2008; Kloet and Hincks 1945	1		PRISWE
Profenusa pygmaea			Animalia (1ANIMK)	Arthropoda (1ARTHP)	Hexapoda (1HEXAQ)	Insecta (1INSEC)		Hymenoptera (1HYMEO)		Tenthredinidae (1TENTF)			Quercus	1945	1968	Native to parts of Europe (Kloet and Hincks 1945)	Browne 1968; Kloet and Hincks 1945; Liston et al. 2014	2
Pseudoanthostomella conorum			Fungi (1FUNGK)	Ascomycota (1ASCOP)	Pezizomycotina (1PEZIQ)	Sordariomycetes (1SORDC)	Xylariomycetidae (1XYLAL)	Xylariales (1XYLAO)		Xylariaceae (1XYLAF)			Pinus	1976	absent		Jones and Baker 2007
Pseudocamarosporium propinquum	Camarosporium propinquum		Fungi (1FUNGK)	Ascomycota (1ASCOP)	Pezizomycotina (1PEZIQ)	Dothideomycetes (1DOTHC)	Pleosporomycetidae (1PLEOL)	Pleosporales (1PLEOO)					Populus, Prunus	1915	1967		See government reports; Muskett and Malone 1985; FRDBI	2
Pseudocercospora moelleriana			Fungi (1FUNGK)	Ascomycota (1ASCOP)	Pezizomycotina (1PEZIQ)	Dothideomycetes (1DOTHC)	Dothideomycetidae (1DTHDL)	Capnodiales (1CAPDO)		Mycosphaerellaceae (1MYCOF)			Arbutus unedo	1994	absent		Jones and Baker 2007
Pseudoinonotus dryadeus	Inonotus dryadeus , Polyporus dryadeus	(Pers.) T. Wagner & M. Fisch.,	Fungi (1FUNGK)	Basidiomycota (1BASIP)		Agaricomycotina (1BASIC)	Agaricomycetes (1AGARL)	Hymenochaetales (1HYMCO)		Hymenochaetaceae (1HYMCF)			Quercus	1853	1883	Native (Ireland)	Ward et al 1993	2
Pseudomonas savastanoi	Pseudomonas syringae pv. Savastanoi		Bacteria (1BACTK)	Proteobacteria (1PROBP)		Gammaproteobacteria (1GAMBC)		Pseudomonadales (1PSDMO)		Pseudomonadaceae (1PSDMF)		Pseudomonas (1PSDMG)	Fraxinus	1957	1967		Ward et al 1993; Dowson 1957	2	RNQP
Pseudomonas syringae pv. Aesculi			Bacteria (1BACTK)	Proteobacteria (1PROBP)		Gammaproteobacteria (1GAMBC)		Pseudomonadales (1PSDMO)		Pseudomonadaceae (1PSDMF)		Pseudomonas (1PSDMG)		2001	2010	Non-native to Ireland	EPPO 2020b; McEvoy et al. 2016; Jones and Baker 2007	1		PSDMAX
Pseudomonas syringae pv. morsprunorum	Pseudomonas morsprunorum		Bacteria (1BACTK)	Proteobacteria (1PROBP)		Gammaproteobacteria (1GAMBC)		Pseudomonadales (1PSDMO)		Pseudomonadaceae (1PSDMF)		Pseudomonas (1PSDMG)	Prunus	1931	1952		Horgan et al. 2004; Wormald 1931 as cited in Dowson 1957	2	RNQP	PSDMMP						Recorded														Recorded
Pseudomonas syringae pv. Syringae			Bacteria (1BACTK)	Proteobacteria (1PROBP)		Gammaproteobacteria (1GAMBC)		Pseudomonadales (1PSDMO)		Pseudomonadaceae (1PSDMF)		Pseudomonas (1PSDMG)	Prunus, Aesculus	1951	1979		CMI map 1979; Horgan et al. 2004; Elliot 1951	2	RNQP	PSDMSY
Pteleobius vittatus			Animalia (1ANIMK)	Arthropoda (1ARTHP)	Hexapoda (1HEXAQ)	Insecta (1INSEC)		Coleoptera (1COLEO)		Curculionidae (1CURCF)				1945	1902 (interception)	Native to parts of Europe (Kloet and Hincks 1945)	O Connor et al. 1991; Kloet and Hincks 1945	2
Pterocomma populeum			Animalia (1ANIMK)	Arthropoda (1ARTHP)	Hexapoda (1HEXAQ)	Insecta (1INSEC)		Hemiptera (1HEMIO)	Sternorrhyncha (1STERR)	Aphididae (1APHIF)		Pterocomma (1PTEOG)	Populus, Salix	1945	1968	Native to parts of Europe (Kloet and Hincks 1945)	Browne 1968; Kloet and Hincks 1945	2		PTEOPO
Pucciniastrum epilobii		(Pers.) G.H. Otth (1861)	Fungi (1FUNGK)	Basidiomycota (1BASIP)		Pucciniomycotina (1TELIC)	Pucciniomycetes (1PUCCL)	Pucciniales (1UREDO)		Pucciniastraceae (1PUCIF)		Pucciniastrum (1PUCIG)		1866	1984	Cryptic EU (Santini et al. 2013)	Muskett and Malone 1980	2		PUCIEP
Pucciniastrum symphyti	Melampsorella symphyti		Fungi (1FUNGK)	Basidiomycota (1BASIP)		Pucciniomycotina (1TELIC)	Pucciniomycetes (1PUCCL)	Pucciniales (1UREDO)		Pucciniastraceae (1PUCIF)		Pucciniastrum (1PUCIG)	Abies	1823	1931		Muskett and Malone 1980; FRDBI	2
Pulvinaria regalis			Animalia (1ANIMK)	Arthropoda (1ARTHP)	Hexapoda (1HEXAQ)	Insecta (1INSEC)		Hemiptera (1HEMIO)	Sternorrhyncha (1STERR)	Coccidae (1COCCF)		Pulvinaria (1PULVG)	Aesculus hippocastanum	1964	1994	Non-native to Ireland	O Connor and Fox 2000; O Connor et al. 2013	1		PULVRE
Pythium oligandrum			Chromista (1CHROK)	Pseudofungi (1PSDFP)		Oomycetes (1OOMYC)		Pythiales (1PYTHO)		Pythiaceae (1PYTHF)		Pythium (1PYTHG)	Picea sitchensis	1938	1971		See government reports	2		PYTHOL
Ramichloridium pini		de Hoog & Rahman (1983)	Fungi (1FUNGK)	Ascomycota (1ASCOP)	Pezizomycotina (1PEZIQ)	Dothideomycetes (1DOTHC)	Dothideomycetidae (1DTHDL)	Capnodiales (1CAPDO)		Mycosphaerellaceae (1MYCOF)		Ramichloridium (anamorphic genus) (1RAMKG)	Pinus contorta	1981	1955	Cryptic EU (Santini et al. 2013)	See government reports; Ward et al 1993; Jones and Baker 2007	2		RAMKPI
Ramularia endophylla	Mycosphaerella punctiformis		Fungi (1FUNGK)	Ascomycota (1ASCOP)	Pezizomycotina (1PEZIQ)	Dothideomycetes (1DOTHC)	Dothideomycetidae (1DTHDL)	Capnodiales (1CAPDO)		Mycosphaerellaceae (1MYCOF)		Ramularia (anamorphic genus) (1RAMUG)	Betula	1866	1933	Native (Ireland)	Muskett and Malone 1985; FRDBI	2		RAMUEN
Raoultella terrigena			Bacteria (1BACTK)										Aesculus		2016		McEvoy et al. 2016	1
Retinia resinella			Animalia (1ANIMK)	Arthropoda (1ARTHP)	Hexapoda (1HEXAQ)	Insecta (1INSEC)		Lepidoptera (1LEPIO)		Tortricidae (1TORTF)		Retinia (1PETVG)	Pinus	1939	ABsent					EVETRE
Rhabdocline laricis	Meria laricis	(Vuill.) Stone,	Fungi (1FUNGK)	Ascomycota (1ASCOP)	Pezizomycotina (1PEZIQ)	Leotiomycetes (1LETOC)		Helotiales (1HELOO)		Hemiphacidiaceae (1HEMPF)		Rhabdocline (1RBDCG)		1920	1928	Native to parts of Europe (Santini et al. 2013)	Muskett and Malone 1985; Quirke 1946	2				Recorded	Recorded	Recorded	Recorded		Recorded			Recorded		Recorded		Recorded
Rhabdocline pseudotsugae			Fungi (1FUNGK)	Ascomycota (1ASCOP)	Pezizomycotina (1PEZIQ)	Leotiomycetes (1LETOC)		Helotiales (1HELOO)		Hemiphacidiaceae (1HEMPF)		Rhabdocline (1RBDCG)	Pseudotsuga	1914	1976	Non-native to Europe (Santini et al. 2013)	CMI 1976; Moore 1959	2		RBDCPS
Rhabdophaga heterobia			Animalia (1ANIMK)	Arthropoda (1ARTHP)	Hexapoda (1HEXAQ)	Insecta (1INSEC)		Diptera (1DIPTO)		Cecidomyiidae (1CECIF)		Rabdophaga (1RHABG)	Salix	1945	1904	Native to parts of Europe (Kloet and Hincks 1945)	Carpenter 1906; Kloet and Hincks 1945	2		RHABHE
Rhagium bifasciatum			Animalia (1ANIMK)	Arthropoda (1ARTHP)	Hexapoda (1HEXAQ)	Insecta (1INSEC)		Coleoptera (1COLEO)		Cerambycidae (1CERAF)		Rhagium (1RHAIG)		1945	2002	Native to parts of Europe (Kloet and Hincks 1945)	Kloet and Hincks 1945	2		RHAIBI
Rhagonycha lignosa			Animalia (1ANIMK)	Arthropoda (1ARTHP)	Hexapoda (1HEXAQ)	Insecta (1INSEC)		Coleoptera (1COLEO)						1945	2002	Native to parts of Europe (Kloet and Hincks 1945)	Kloet and Hincks 1945	2
Rhizina undulata	Rhizina inflata	Fr. (1815)	Fungi (1FUNGK)	Ascomycota (1ASCOP)	Pezizomycotina (1PEZIQ)	Pezizomycetes (1PEZZC)		Pezizales (1PEZZO)		Rhizinaceae (1RIZIF)		Rhizina (1RIZIG)	Picea, Pinus	1910	1952		McKay and Clear 1953; Moore 1959; Ward et al. 1993; See government reports; de Brit Forest research review 1957-1965	2		RIZIUN					Recorded		Recorded			Recorded		Recorded	Recorded	Recorded					Recorded						Recorded		Recorded
Rhizoctonia solani	Thanatephorus cucumeris		Fungi (1FUNGK)	Basidiomycota (1BASIP)		Agaricomycotina (1BASIC)	Agaricomycetes (1AGARL)	Ceratobasidiales (1CRTBO)		Ceratobasidiaceae (1CRTBF)		Thanatephorus (1THAPG)	Cupressocyparis leylandii	1880	1910		Muskett and Malone 1985	2		RHIZSO
Rhizosphaera kalkhoffii		Bubák,	Fungi (1FUNGK)	Ascomycota (1ASCOP)	Pezizomycotina (1PEZIQ)	Dothideomycetes (1DOTHC)	Pleosporomycetidae (1PLEOL)	Pleosporales (1PLEOO)		Venturiaceae (1VENTF)		Rhizosphaera (1RIZSG)	Abies nobilis	1914	1925		Muskett and Malone 1985; Ward et al 1993; Moore 1959; McAree 1988; See government reports	2		RIZSKA
Rhogogaster viridis		Linnaeus, 1758	Animalia (1ANIMK)	Arthropoda (1ARTHP)	Hexapoda (1HEXAQ)	Insecta (1INSEC)		Hymenoptera (1HYMEO)		Tenthredinidae (1TENTF)		Rhogogaster (1RHGGG)	Alnus	1945	1968	Native to parts of Europe (Kloet and Hincks 1945)	Browne 1968; Kloet and Hincks 1945	2		RHGGVI
Rhopalosiphum insertum			Animalia (1ANIMK)	Arthropoda (1ARTHP)	Hexapoda (1HEXAQ)	Insecta (1INSEC)		Hemiptera (1HEMIO)	Sternorrhyncha (1STERR)	Aphididae (1APHIF)		Rhopalosiphum (1RHOPG)			1996		Mowat and Clawson, 1996	2		RHOPIN
Rhyacionia buoliana	Evetria buoliana		Animalia (1ANIMK)	Arthropoda (1ARTHP)	Hexapoda (1HEXAQ)	Insecta (1INSEC)		Lepidoptera (1LEPIO)		Tortricidae (1TORTF)		Rhyacionia (1RHYAG)	Pinus	1800	1943	Native to parts of Europe (Kloet and Hincks 1945); Native to Ireland (Quirke 1947)	See government reports, de Brit Forest research review 1964-1970; NBN Atlas	2		EVETBU			Recorded																					Recorded			Recorded
Rhynchaenus fagi	Orchestes fagi		Animalia (1ANIMK)	Arthropoda (1ARTHP)	Hexapoda (1HEXAQ)	Insecta (1INSEC)		Coleoptera (1COLEO)		Curculionidae (1CURCF)		Rhynchaenus (1RHYHG)		1945	1968	Native to parts of Europe (Kloet and Hincks 1945)	Browne 1968; Day and Watt 1989; Quirke 1947; Kloet and Hincks 1945	2		RHYHFA
Rhytisma acerinum		(Pers.) Fr. (1819);	Fungi (1FUNGK)	Ascomycota (1ASCOP)	Pezizomycotina (1PEZIQ)	Leotiomycetes (1LETOC)		Rhytismatales (1RHYTO)		Rhytismataceae (1RHYTF)		Rhytisma (1RHYTG)	Acer	1849	1840	Native to parts of Europe (Santini et al. 2013)	Muskett and Malone 1983; Ward et al 1993; Horgan et al. 2004	2		RHYTAC
Rosellinia quercina			Fungi (1FUNGK)	Ascomycota (1ASCOP)	Pezizomycotina (1PEZIQ)	Sordariomycetes (1SORDC)	Xylariomycetidae (1XYLAL)	Xylariales (1XYLAO)		Xylariaceae (1XYLAF)		Rosellinia (1ROSLG)	Quercus	1912	Absent		Moore 1959			ROSLQU
Saperda populnea	Odinia boletina		Animalia (1ANIMK)	Arthropoda (1ARTHP)	Hexapoda (1HEXAQ)	Insecta (1INSEC)		Coleoptera (1COLEO)		Cerambycidae (1CERAF)		Saperda (1SAPEG)		1945	1983	Native to parts of Europe (Kloet and Hincks 1945)	De Courcy Williams 1986; Kloet and Hincks 1945	2		SAPEPO
Sawadaea bicornis	Uncinula aceris, Uncinula bicornis		Fungi (1FUNGK)	Ascomycota (1ASCOP)	Pezizomycotina (1PEZIQ)	Leotiomycetes (1LETOC)		Erysiphales (1ERYSO)		Erysiphaceae (1ERYSF)		Sawadaea (1SAWDG)	Acer	1889	1878		Muskett and Malone 1983	2		UNCIBI
Schizolachnus pineti			Animalia (1ANIMK)	Arthropoda (1ARTHP)	Hexapoda (1HEXAQ)	Insecta (1INSEC)		Hemiptera (1HEMIO)	Sternorrhyncha (1STERR)	Aphididae (1APHIF)		Schizolachnus (1SCHLG)	Pinus	1945	1941	Native to parts of Europe (Kloet and Hincks 1945)	Carter et al 1987; Kloet and Hincks 1945	2		SCHLPI
Scolioneura betuleti			Animalia (1ANIMK)	Arthropoda (1ARTHP)	Hexapoda (1HEXAQ)	Insecta (1INSEC)		Hymenoptera (1HYMEO)		Tenthredinidae (1TENTF)			Betula	1945	1968	Native to parts of Europe (Kloet and Hincks 1945)	Browne 1968; Kloet and Hincks 1945	2
Scolytus multistriatus			Animalia (1ANIMK)	Arthropoda (1ARTHP)	Hexapoda (1HEXAQ)	Insecta (1INSEC)		Coleoptera (1COLEO)		Scolytidae (1SCOLF)		Scolytus (1SCOLG)	Ulmus	1900	1980	Native to parts of Europe (Kloet and Hincks 1945)	O'Callaghan 1982; PlantWise; MacDougal 1900	2		SCOLMU
Scolytus scolytus			Animalia (1ANIMK)	Arthropoda (1ARTHP)	Hexapoda (1HEXAQ)	Insecta (1INSEC)		Coleoptera (1COLEO)		Scolytidae (1SCOLF)		Scolytus (1SCOLG)	Ulmus	1897	1943		Quirke 1943 as cited in O'Connor et al. 1991; PlantWise; NBN Atlas	2		SCOLSC
Seiridium cardinale	Coryneum cardinale	(W.W. Wagener) B. Sutton & I.A.S. Gibson	Fungi (1FUNGK)	Ascomycota (1ASCOP)	Pezizomycotina (1PEZIQ)	Sordariomycetes (1SORDC)	Xylariomycetidae (1XYLAL)	Amphisphaeriales (1AMPSO)		Amphisphaeriaceae (1AMPSF)		Seiridium (anamorphic genus) (1SEIRG)	Cupressus macrocarpa	1966	1971	Non-native to Europe (Santini et al. 2013)	See governemnt reports; Clancy 1986; Ward et al 1993; FRDBI	2		SEIRCA
Silvanus bidentatus			Animalia (1ANIMK)	Arthropoda (1ARTHP)	Hexapoda (1HEXAQ)	Insecta (1INSEC)		Coleoptera (1COLEO)							1990		Good and Hume 1991	2
Sirex noctilio			Animalia (1ANIMK)	Arthropoda (1ARTHP)	Hexapoda (1HEXAQ)	Insecta (1INSEC)		Hymenoptera (1HYMEO)		Siricidae (1SIRIF)		Sirex (1SIRXG)		1945	1982 (interception)	Non-native to Europe (Kloet and Hincks 1945); Non-native to Ireland (O'Connor and Nash 1983)	Liston and Sheppard 2008; Kloet and Hincks 1945; O Connor and Nash 1983	1		SIRXNO
Sirex torvus			Animalia (1ANIMK)	Arthropoda (1ARTHP)	Hexapoda (1HEXAQ)	Insecta (1INSEC)		Hymenoptera (1HYMEO)		Siricidae (1SIRIF)		Sirex (1SIRXG)		2014	2014		Liston et al. 2014	2
Sirococcus conigenus	Sirococcus strobilinus, Sporonema strobilinum		Fungi (1FUNGK)	Ascomycota (1ASCOP)	Pezizomycotina (1PEZIQ)	Sordariomycetes (1SORDC)	Sordariomycetidae (1SRDAL)	Diaporthales (1DIAPO)				Sirococcus (anamorphic genus) (1SIROG)	Abies	1908	1936		O'Connor 1936; FRDBI	2		SIROCO
Sirococcus tsugae			Fungi (1FUNGK)	Ascomycota (1ASCOP)	Pezizomycotina (1PEZIQ)	Sordariomycetes (1SORDC)	Sordariomycetidae (1SRDAL)	Diaporthales (1DIAPO)				Sirococcus (anamorphic genus) (1SIROG)	Cedrus	2004	2016		See government reports	3		SIROTS
Sphaeropsis sapinea	Diplodia pinastri		Fungi (1FUNGK)	Ascomycota (1ASCOP)	Pezizomycotina (1PEZIQ)	Dothideomycetes (1DOTHC)		Botryosphaeriales (1BOTSO)		Botryosphaeriaceae (1BOTSF)		Diplodia (anamorphic genus) (1DIPDG)	Pinus	1905	1934		Muskett and Malone 1985; FRDBI	2		DIPDPI
Stereum gausapatum		(Fr.) Fr. (1874);	Fungi (1FUNGK)	Basidiomycota (1BASIP)		Agaricomycotina (1BASIC)	Agaricomycetes (1AGARL)	Russulales (1RUSSO)		Stereaceae (1STERF)		Stereum (1STERG)	Quercus	1877	1910		Muskett and Malone 1980; Horgan et al. 2004	2		STERGA
Stereum sanguinolentum		(Alb. & Schwein.) Fr. (1838);	Fungi (1FUNGK)	Basidiomycota (1BASIP)		Agaricomycotina (1BASIC)	Agaricomycetes (1AGARL)	Russulales (1RUSSO)		Stereaceae (1STERF)		Stereum (1STERG)		1879	1843	Native (Ireland)	Muskett and Malone 1980; Ward et al 1993	2		STERSA
Stigmina carpophila		(Lév.) M.B. Ellis (1959)	Fungi (1FUNGK)	Ascomycota (1ASCOP)	Pezizomycotina (1PEZIQ)	Dothideomycetes (1DOTHC)	Pleosporomycetidae (1PLEOL)	Pleosporales (1PLEOO)		Dothidotthiaceae (1DOTTF)		Wilsonomyces (anamorphic genus) (1WILSG)		1864	1884		Muskett and Malone 1985	2		STIGCA
Strophosoma melanogrammus	Strophosomus coryli		Animalia (1ANIMK)	Arthropoda (1ARTHP)	Hexapoda (1HEXAQ)	Insecta (1INSEC)		Coleoptera (1COLEO)		Curculionidae (1CURCF)			Corylus, Rhododendron, Fagus, Picea, Larix, Pinus, Quercus	1945	1947	Native Ireland (Quirke 1947)	Quirke 1947; Browne 1968; Kloet and Hincks 1945	2
Sydowia polyspora	Sclerophoma pithyophila	(Bref. & Tavel) E. Müll.,	Fungi (1FUNGK)	Ascomycota (1ASCOP)	Pezizomycotina (1PEZIQ)	Dothideomycetes (1DOTHC)	Dothideomycetidae (1DTHDL)	Dothideales (1DOTHO)		Dothioraceae (1DOTRF)		Sydowia (1SYDOG)	Pinus contorta, Pinus sylvestris	1913	1936		Muskett and Malone 1985; Ward et al 1993; McAree 1972	2		SYDOPO																													Recorded
Taphrina alni			Fungi (1FUNGK)	Ascomycota (1ASCOP)	Taphrinomycotina (1TAPHQ)	Taphrinomycetes (1TAPNC)		Taphrinales (1TAPHO)		Taphrinaceae (1TAPHF)		Taphrina (1TAPHG)	Alnus	1922	1934		O Connor 1936; FRDBI	2		TAPHAL
Taphrina betulina	Exoascus betulinus	Rostr. (1883);	Fungi (1FUNGK)	Ascomycota (1ASCOP)	Taphrinomycotina (1TAPHQ)	Taphrinomycetes (1TAPNC)		Taphrinales (1TAPHO)		Taphrinaceae (1TAPHF)		Taphrina (1TAPHG)	Betula	1903	1890		Muskett and Malone 1983; Ward et al 1993; Horgan et al. 2004; Elwes and Henry 1906	2		TAPHBE
Taphrina caerulescens			Fungi (1FUNGK)	Ascomycota (1ASCOP)	Taphrinomycotina (1TAPHQ)	Taphrinomycetes (1TAPNC)		Taphrinales (1TAPHO)		Taphrinaceae (1TAPHF)		Taphrina (1TAPHG)	Quercus	1905	1936		Muskett and Malone 1983	2		TAPHCA
Taphrina deformans		(Berk.) Tul. (1866)	Fungi (1FUNGK)	Ascomycota (1ASCOP)	Taphrinomycotina (1TAPHQ)	Taphrinomycetes (1TAPNC)		Taphrinales (1TAPHO)		Taphrinaceae (1TAPHF)		Taphrina (1TAPHG)	Prunus	1888	1893	Native (Ireland)	Muskett and Malone 1983	2		TAPHDE															Recorded					Recorded		Recorded
Taphrina populina	Taphrina aurea	Fr.,	Fungi (1FUNGK)	Ascomycota (1ASCOP)	Taphrinomycotina (1TAPHQ)	Taphrinomycetes (1TAPNC)		Taphrinales (1TAPHO)		Taphrinaceae (1TAPHF)		Taphrina (1TAPHG)	Populus	1894	1852	Native (Ireland)	Muskett and Malone 1983; Ward et al 1993	2		TAPHPO								Recorded							Recorded											Recorded		Recorded
Taphrina tosquinetti			Fungi (1FUNGK)	Ascomycota (1ASCOP)	Taphrinomycotina (1TAPHQ)	Taphrinomycetes (1TAPNC)		Taphrinales (1TAPHO)		Taphrinaceae (1TAPHF)		Taphrina (1TAPHG)	Alnus	1921	1931		Muskett and Malone 1983; FRDBI	2
Taphrina wiesneri	Taphrina cerasi		Fungi (1FUNGK)	Ascomycota (1ASCOP)	Taphrinomycotina (1TAPHQ)	Taphrinomycetes (1TAPNC)		Taphrinales (1TAPHO)		Taphrinaceae (1TAPHF)		Taphrina (1TAPHG)	Prunus	1934	1933		Muskett and Malone 1983; Ward et al 1994	2		TAPHWI
Taxomyia taxi			Animalia (1ANIMK)	Arthropoda (1ARTHP)	Hexapoda (1HEXAQ)	Insecta (1INSEC)		Diptera (1DIPTO)		Cecidomyiidae (1CECIF)		Taxomyia (1TAXMG)		1945	2001	Native to parts of Europe (Kloet and Hincks 1945)	Kloet and Hincks 1945; IE EU forest health survey 2002	2		TAXMTA
Tenthredo ferruginea			Animalia (1ANIMK)	Arthropoda (1ARTHP)	Hexapoda (1HEXAQ)	Insecta (1INSEC)		Hymenoptera (1HYMEO)		Tenthredinidae (1TENTF)			Alnus, Salix	1945	1968	Native to parts of Europe (Kloet and Hincks 1945)	Browne 1968; Kloet and Hincks 1945; Liston et al. 2014	2
Tenthredo livida			Animalia (1ANIMK)	Arthropoda (1ARTHP)	Hexapoda (1HEXAQ)	Insecta (1INSEC)		Hymenoptera (1HYMEO)		Tenthredinidae (1TENTF)			Salix	1945	1968	Native to parts of Europe (Kloet and Hincks 1945)	Browne 1968; Kloet and Hincks 1945; Liston et al. 2014	2
Thaumetopoea processionae			Animalia (1ANIMK)	Arthropoda (1ARTHP)	Hexapoda (1HEXAQ)	Insecta (1INSEC)		Lepidoptera (1LEPIO)					Quercus	2005	Absent		Forestry Commission website		Quarantine
Thelephora terrestris			Fungi (1FUNGK)	Basidiomycota (1BASIP)		Agaricomycotina (1BASIC)	Agaricomycetes (1AGARL)	Thelephorales (1THELO)		Thelephoraceae (1THELF)		Thelephora (1THELG)		1794	1840	Native (Ireland)	Muskett and Malone 1980	2		THELTE
Thielaviopsis radicicola			Fungi (1FUNGK)	Ascomycota (1ASCOP)	Pezizomycotina (1PEZIQ)	Sordariomycetes (1SORDC)	Hypocreomycetidae (1HYPRL)	Microascales (1MICRO)		Ceratocystidaceae (1CERKF)		Thielaviopsis (anamorphic genus) (1THIEG)	Pinus	1976	absent		Jones and Baker 2007			CERARA
Tomicus piniperda	Hylurgus piniperda; Mylophilus piniperda		Animalia (1ANIMK)	Arthropoda (1ARTHP)	Hexapoda (1HEXAQ)	Insecta (1INSEC)		Coleoptera (1COLEO)		Scolytidae (1SCOLF)		Tomicus (1TOMSG)	Pinus contorta	1891	1885	Native (Quirke 1947)	Johnson and Halbert 1902; Carpenter 1907; Browne 1968; Carpenter 1906; Quirke 1947	2		BLASPI
Tomostethus nigritus			Animalia (1ANIMK)	Arthropoda (1ARTHP)	Hexapoda (1HEXAQ)	Insecta (1INSEC)		Hymenoptera (1HYMEO)		Tenthredinidae (1TENTF)		Tomostethus (1TOMOG)	Fraxinus	1876	2016		Jess et al. 2017	1		TOMONI
Tortrix viridana			Animalia (1ANIMK)	Arthropoda (1ARTHP)	Hexapoda (1HEXAQ)	Insecta (1INSEC)		Lepidoptera (1LEPIO)		Tortricidae (1TORTF)		Tortrix (1TORTG)	Quercus	1945	1904	Native to parts of Europe (Kloet and Hincks 1945); Native to Ireland (Quirke 1947)	Elwes and Henry 1906; Kloet and Hincks 1945; Carpenter 1905; O’Meara, 2001; Bond et al., 2006	1		TORTVI
Tranzschelia discolor			Fungi (1FUNGK)	Basidiomycota (1BASIP)		Pucciniomycotina (1TELIC)	Pucciniomycetes (1PUCCL)	Pucciniales (1UREDO)		Uropyxidaceae (1URPXF)		Tranzschelia (1TRANG)	Prunus	1828	1878	Native (Ireland)	Muskett and Malone 1980; FRDBI	2		TRANDI
Trichiosoma laterale	Trichiosoma latreillei	Leach, 1817	Animalia (1ANIMK)	Arthropoda (1ARTHP)	Hexapoda (1HEXAQ)	Insecta (1INSEC)		Hymenoptera (1HYMEO)		Cimbicidae			Betula, Salix	1945	1968	Native to parts of Europe (Kloet and Hincks 1945)	Browne 1968; Kloet and Hincks 1945; Liston et al. 2014	2
Trichiosoma vitellinae			Animalia (1ANIMK)	Arthropoda (1ARTHP)	Hexapoda (1HEXAQ)	Insecta (1INSEC)		Hymenoptera (1HYMEO)		Cimbicidae			Salix	1945	1968		Browne 1968; Kloet and Hincks 1945	2
Trichothecium roseum			Fungi (1FUNGK)	Ascomycota (1ASCOP)	Pezizomycotina (1PEZIQ)	Sordariomycetes (1SORDC)	Hypocreomycetidae (1HYPRL)	Hypocreales (1HYPRO)				Trichothecium (anamorphic genus) (1TRITG)		1899	1884		Muskett and Malone 1985, FRDBI	2		TRITRO
Trypodendron lineatum			Animalia (1ANIMK)	Arthropoda (1ARTHP)	Hexapoda (1HEXAQ)	Insecta (1INSEC)		Coleoptera (1COLEO)		Scolytidae (1SCOLF)		Trypodendron (1TRYDG)		1945	2002		Kloet and Hincks 1945	2		TRYDLI
Tuberolachnus salignus			Animalia (1ANIMK)	Arthropoda (1ARTHP)	Hexapoda (1HEXAQ)	Insecta (1INSEC)		Hemiptera (1HEMIO)	Sternorrhyncha (1STERR)	Aphididae (1APHIF)		Tuberolachnus (1TUBRG)	Salix	1919	1924		Carter et al 1987; NBN Atlas	2		TUBRSA
Tylospora fibrillosa	Tylosperma fibrillosum		Fungi (1FUNGK)	Basidiomycota	Agaricomycotina	Agaricomycetes	Agaricomycetidae	Atheliales		Atheliaceae			Picea sitchensis	1963	1971		See government reports; FRDBI	2
Urocerus gigas	Sirex gigas		Animalia (1ANIMK)	Arthropoda (1ARTHP)	Hexapoda (1HEXAQ)	Insecta (1INSEC)		Hymenoptera (1HYMEO)		Siricidae (1SIRIF)		Urocerus (1URCEG)		1945	1902	Non-native to Europe (Kloet and Hincks 1945)	Carpenter 1902; Carpenter 1907; Liston and Sheppard 2008; Kloet and Hincks 1945	1		URCEGI
Valsa sordida		Nitschke (1870)	Fungi (1FUNGK)	Ascomycota (1ASCOP)	Pezizomycotina (1PEZIQ)	Sordariomycetes (1SORDC)	Sordariomycetidae (1SRDAL)	Diaporthales (1DIAPO)		Cytosporaceae (1CYTSF)		Cytospora (1CYTOG)		1918	2000		IE EU forest health survey 2002; FRDBI	3		VALSSO
Venturia populina			Fungi (1FUNGK)	Ascomycota (1ASCOP)	Pezizomycotina (1PEZIQ)	Dothideomycetes (1DOTHC)	Pleosporomycetidae (1PLEOL)	Pleosporales (1PLEOO)		Venturiaceae (1VENTF)		Venturia (1VENTG)	Populus	1973	1983		See government reports	2		VENTPO
Venturia saliciperda	Fusicladium saliciperdum	Nüesch,	Fungi (1FUNGK)	Ascomycota (1ASCOP)	Pezizomycotina (1PEZIQ)	Dothideomycetes (1DOTHC)	Pleosporomycetidae (1PLEOL)	Pleosporales (1PLEOO)		Venturiaceae (1VENTF)		Venturia (1VENTG)	Salix	1971	1972		See government reports; Ward et al 1993; FRDBI	2		VENTSA
Xanthomonas arboricola pv. pruni			Bacteria (1BACTK)	Proteobacteria (1PROBP)		Gammaproteobacteria (1GAMBC)		Lysobacterales (1LYSOO)		Lysobacteraceae (1LYSOF)		Xanthomonas (1XANTG)		2014	absent		EPPO 2020b		Quarantine/RNQP	XANTPR
Xanthomonas populi	Aplanobacter populi	(ex Ridé, 1958) van den Mooter & Swings, 1990	Bacteria (1BACTK)	Proteobacteria (1PROBP)		Gammaproteobacteria (1GAMBC)		Lysobacterales (1LYSOO)		Lysobacteraceae (1LYSOF)		Xanthomonas (1XANTG)		1980	1996		Ward et al 1993; EPPO 2020a	2		XANTPO
Xanthoporia radiata	Inonotus radiatus; Mensularia radiata		Fungi (1FUNGK)	Basidiomycota (1BASIP)		Agaricomycotina (1BASIC)	Agaricomycetes (1AGARL)	Hymenochaetales (1HYMCO)		Hymenochaetaceae (1HYMCF)				1857	1840	Native (Ireland)	Muskett and Malone 1980; FRDBI	2
Xylosandrus germanus			Animalia (1ANIMK)	Arthropoda (1ARTHP)	Hexapoda (1HEXAQ)	Insecta (1INSEC)		Coleoptera (1COLEO)		Scolytidae (1SCOLF)		Xylosandrus (1XYLSG)	Conifer and Broadleaf	2012	ABsent					XYLBGE
Xylotrechus colonus			Animalia (1ANIMK)	Arthropoda (1ARTHP)	Hexapoda (1HEXAQ)	Insecta (1INSEC)		Coleoptera (1COLEO)		Cerambycidae (1CERAF)		Xylotrechus (1XYLOG)			1979 (interception)		O Connor and Nash 1981	2		XYLOCO
Yponomeuta evonymella			Animalia (1ANIMK)	Arthropoda (1ARTHP)	Hexapoda (1HEXAQ)	Insecta (1INSEC)		Lepidoptera (1LEPIO)		Yponomeutidae (1YPONF)		Yponomeuta (1HYPNG)		1945	2006	Native to parts of Europe (Kloet and Hincks 1945)	Bond et al. 2006; Kloet and Hincks 1945	1		HYPNEV
Yponomeuta padella			Animalia (1ANIMK)	Arthropoda (1ARTHP)	Hexapoda (1HEXAQ)	Insecta (1INSEC)		Lepidoptera (1LEPIO)		Yponomeutidae (1YPONF)		Yponomeuta (1HYPNG)	Crataegus	1945	1907	Native to parts of Europe (Kloet and Hincks 1945)	Carpenter 1908; Kloet and Hincks 1945	2		HYPNPA
Zeiraphera diniana			Animalia (1ANIMK)	Arthropoda (1ARTHP)	Hexapoda (1HEXAQ)	Insecta (1INSEC)		Lepidoptera (1LEPIO)		Tortricidae (1TORTF)		Zeiraphera (1ZEIRG)	Larix	1950	Absent		Browne 1968; Bevan 1987	2		EPINDI
[truncated: 99 more columns]

## Sheet: Sheet1
																		Arthropods	Bacteria	Oomycetes	Fungi	All pests			All pests	Bacteria	Oomycetes	Fungi	Arthropods
Daldinia concentrica			Fungi (1FUNGK)	Ascomycota (1ASCOP)	Pezizomycotina (1PEZIQ)	Sordariomycetes (1SORDC)	Xylariomycetidae (1XYLAL)	Xylariales (1XYLAO)		Xylariaceae (1XYLAF)		Daldinia (1DALDG)		1791	1726	1726	1	1833	1952	1888	1726	1726	1725
Cerioporus squamosus	Polyporus squamosus	(Huds.) Quél.,	Fungi (1FUNGK)	Basidiomycota (1BASIP)		Agaricomycotina (1BASIC)	Agaricomycetes (1AGARL)	Polyporales (1PORIO)						1787	1800	1727	2	1854	1967	1922	1800	1800	1726		1			1
Ganoderma applanatum		(Pers.) Pat. (1887);	Fungi (1FUNGK)	Basidiomycota (1BASIP)		Agaricomycotina (1BASIC)	Agaricomycetes (1AGARL)	Polyporales (1PORIO)		Ganodermataceae (1GANOF)		Ganoderma (1GANOG)	Fagus, Picea, Laburnum	1853	1804	1728	3	1854	1979	1926	1804	1804	1727		1			1
Gymnopus fusipes	Collybia fusipes		Fungi (1FUNGK)	Basidiomycota (1BASIP)		Agaricomycotina (1BASIC)	Agaricomycetes (1AGARL)	Agaricales (1AGARO)		Marasmiaceae (1MARAF)		Gymnopus (1GYMUG)	Quercus	1865	1804	1729	4	1879	1986	1929	1804	1804	1728		1			1
Bibio marci	St Mark's fly		Animalia (1ANIMK)	Arthropoda (1ARTHP)	Hexapoda (1HEXAQ)	Insecta (1INSEC)		Diptera (1DIPTO)		Bibionidae (1BIBIF)		Bibio (1BIBIG)		1898	1833	1730	5	1885	1996	1930	1836	1833	1729		1			1
Heterobasidion annosum	Fomes annosus, Oedocephalum lineatum	(Fr.) Bref.,	Fungi (1FUNGK)	Basidiomycota (1BASIP)		Agaricomycotina (1BASIC)	Agaricomycetes (1AGARL)	Russulales (1RUSSO)		Bondarzewiaceae (1BONDF)		Heterobasidion (1HETEG)	Nothofagus, Prunus, Chamaecyparis, Tsuga, Larix, Picea, Pseudotsuga, Pinus	1859	1836	1731	6	1890	2010	1969	1837	1836	1730		1			1
Gymnosporangium clavariaeforme			Fungi (1FUNGK)	Basidiomycota (1BASIP)		Pucciniomycotina (1TELIC)	Pucciniomycetes (1PUCCL)	Pucciniales (1UREDO)		Pucciniaceae (1PUCCF)		Gymnosporangium (1GYMNG)	Crataegus, Juniperus	1878	1837	1732	7	1892	2016	1969	1840	1837	1731		1			1
Chondrostereum purpureum	Stereum purpureum		Fungi (1FUNGK)	Basidiomycota (1BASIP)		Agaricomycotina (1BASIC)	Agaricomycetes (1AGARL)	Agaricales (1AGARO)		Cyphellaceae (1CYPHF)		Chondrostereum (1KDOSG)	Prunus	1791	1840	1733	8	1893	2016	1971	1840	1840	1732		1			1
Gymnosporangium fuscum			Fungi (1FUNGK)	Basidiomycota (1BASIP)		Pucciniomycotina (1TELIC)	Pucciniomycetes (1PUCCL)	Pucciniales (1UREDO)		Pucciniaceae (1PUCCF)		Gymnosporangium (1GYMNG)	Juniperus	1905	1840	1734	9	1893	2016	1995	1840	1840	1733		1			1
Lachnellula willkommii	Trichoscyphella willkommii; Peziza willkommii	(R. Hartig) Dennis (1962);	Fungi (1FUNGK)	Ascomycota (1ASCOP)	Pezizomycotina (1PEZIQ)	Leotiomycetes (1LETOC)		Helotiales (1HELOO)		Hyaloscyphaceae (1HYASF)		Lachnellula (1LCHNG)	Larix europea	1800	1840	1735	10	1894	2016	2001	1840	1840	1734		1			1
Lophodermium pinastri		(Schrad.) Chevall. (1826);	Fungi (1FUNGK)	Ascomycota (1ASCOP)	Pezizomycotina (1PEZIQ)	Leotiomycetes (1LETOC)		Rhytismatales (1RHYTO)		Rhytismataceae (1RHYTF)		Lophodermium (1LOPHG)	Pinus contorta, Pinus sylvestris	1899	1840	1736	11	1895	2017	2002	1840	1840	1735		1			1
Rhytisma acerinum		(Pers.) Fr. (1819);	Fungi (1FUNGK)	Ascomycota (1ASCOP)	Pezizomycotina (1PEZIQ)	Leotiomycetes (1LETOC)		Rhytismatales (1RHYTO)		Rhytismataceae (1RHYTF)		Rhytisma (1RHYTG)	Acer	1849	1840	1737	12	1895		2008	1840	1840	1736		1			1
Thelephora terrestris			Fungi (1FUNGK)	Basidiomycota (1BASIP)		Agaricomycotina (1BASIC)	Agaricomycetes (1AGARL)	Thelephorales (1THELO)		Thelephoraceae (1THELF)		Thelephora (1THELG)		1794	1840	1738	13	1897		2009	1840	1840	1737		1			1
Xanthoporia radiata	Inonotus radiatus; Mensularia radiata		Fungi (1FUNGK)	Basidiomycota (1BASIP)		Agaricomycotina (1BASIC)	Agaricomycetes (1AGARL)	Hymenochaetales (1HYMCO)		Hymenochaetaceae (1HYMCF)				1857	1840	1739	14	1898		2011	1843	1840	1738		1			1
Armillaria mellea		(Vahl) P. Kumm.,	Fungi (1FUNGK)	Basidiomycota (1BASIP)		Agaricomycotina (1BASIC)	Agaricomycetes (1AGARL)	Agaricales (1AGARO)		Physalacriaceae (1PHSLF)		Armillaria (1ARMLG)	Nothofagus, Betula, Prunus, Tsuga, Larix, Picea, Chamaecyparis, Alnus, Thuja, Fagus, Rhododendron, Lingistrum, Crataegus, Griselinia, Calluna	1797	1843	1740	15	1900		2012	1843	1843	1739		1			1
Stereum sanguinolentum		(Alb. & Schwein.) Fr. (1838);	Fungi (1FUNGK)	Basidiomycota (1BASIP)		Agaricomycotina (1BASIC)	Agaricomycetes (1AGARL)	Russulales (1RUSSO)		Stereaceae (1STERF)		Stereum (1STERG)		1879	1843	1741	16	1900		2012	1844	1843	1740		1			1
Grifola frondosa		(Dicks.) Gray (1821);	Fungi (1FUNGK)	Basidiomycota (1BASIP)		Agaricomycotina (1BASIC)	Agaricomycetes (1AGARL)	Polyporales (1PORIO)		Meripilaceae (1MERIF)		Grifola (1GRIFG)		1831	1844	1742	17	1900		2014	1852	1844	1741		1			1
Coleosporium tussilaginis	coleosporium senecionis	(Pers.) Lév. (1849);	Fungi (1FUNGK)	Basidiomycota (1BASIP)		Pucciniomycotina (1TELIC)	Pucciniomycetes (1PUCCL)	Pucciniales (1UREDO)		Coleosporiaceae (1COLSF)		Coleosporium (1COLSG)	Pinus sylvestris	1822	1852	1743	18	1900		2015	1852	1852	1742		1			1
Gymnosporangium cornutum	Gymnosporangium juniperi		Fungi (1FUNGK)	Basidiomycota (1BASIP)		Pucciniomycotina (1TELIC)	Pucciniomycetes (1PUCCL)	Pucciniales (1UREDO)		Pucciniaceae (1PUCCF)		Gymnosporangium (1GYMNG)	Sorbus, Juniperus	1809	1852	1744	19	1902		2015	1852	1852	1743		1			1
Melampsora laricis-populina			Fungi (1FUNGK)	Basidiomycota (1BASIP)		Pucciniomycotina (1TELIC)	Pucciniomycetes (1PUCCL)	Pucciniales (1UREDO)		Melampsoraceae (1MELMF)		Melampsora (1MELMG)	Populus deltoides	1880	1852	1745	20	1902		2015	1852	1852	1744		1			1
Melampsora populnea	Melampsora pinitorqua		Fungi (1FUNGK)	Basidiomycota (1BASIP)		Pucciniomycotina (1TELIC)	Pucciniomycetes (1PUCCL)	Pucciniales (1UREDO)		Melampsoraceae (1MELMF)		Melampsora (1MELMG)	Populus	1838	1852	1746	21	1902		2015	1852	1852	1745		1			1
Melampsora salicis-albae			Fungi (1FUNGK)	Basidiomycota (1BASIP)		Pucciniomycotina (1TELIC)	Pucciniomycetes (1PUCCL)	Pucciniales (1UREDO)		Melampsoraceae (1MELMF)		Melampsora (1MELMG)	Salix	1865	1852	1747	22	1902			1852	1852	1746		1			1
Taphrina populina	Taphrina aurea	Fr.,	Fungi (1FUNGK)	Ascomycota (1ASCOP)	Taphrinomycotina (1TAPHQ)	Taphrinomycetes (1TAPNC)		Taphrinales (1TAPHO)		Taphrinaceae (1TAPHF)		Taphrina (1TAPHG)	Populus	1894	1852	1748	23	1903			1856	1852	1747		1			1
Hylastes brunneus	Hylastes ater		Animalia (1ANIMK)	Arthropoda (1ARTHP)	Hexapoda (1HEXAQ)	Insecta (1INSEC)		Coleoptera (1COLEO)		Scolytidae (1SCOLF)		Hylastes (1HYASG)		1901	1854	1749	24	1904			1867	1854	1748		1			1
Pityophthorus pubescens			Animalia (1ANIMK)	Arthropoda (1ARTHP)	Hexapoda (1HEXAQ)	Insecta (1INSEC)		Coleoptera (1COLEO)		Scolytidae (1SCOLF)		Pityophthorus (1PITOG)	Pinus	1800	1854	1750	25	1904			1874	1854	1749		1			1
Fomitopsis betulina	Piptoporus betulinus	(Bull.) B.K. Cui, M.L. Han & Y.C. Dai,	Fungi (1FUNGK)	Basidiomycota (1BASIP)		Agaricomycotina (1BASIC)	Agaricomycetes (1AGARL)	Polyporales (1PORIO)		Fomitopsidaceae (1FOMIF)		Fomitopsis (1FOMIG)	Betula	1791	1856	1751	26	1904			1878	1856	1750		1			1
Nectria cinnabarina		(Tode) Fr. (1849);	Fungi (1FUNGK)	Ascomycota (1ASCOP)	Pezizomycotina (1PEZIQ)	Sordariomycetes (1SORDC)	Hypocreomycetidae (1HYPRL)	Hypocreales (1HYPRO)		Nectriaceae (1NECTF)		Nectria (1NECTG)	Fraxinus, Acer, Sorbus, Aesculus	1800	1867	1752	27	1904			1878	1867	1751		1			1
Phyllactinia guttata			Fungi (1FUNGK)	Ascomycota (1ASCOP)	Pezizomycotina (1PEZIQ)	Leotiomycetes (1LETOC)		Erysiphales (1ERYSO)		Erysiphaceae (1ERYSF)		Phyllactinia (1PHYLG)	Fraxinus, Fagus, Corylus	1888	1874	1753	28	1905			1878	1874	1752		1			1
Dothidella ulmi	Platychora ulmi		Fungi (1FUNGK)	Ascomycota (1ASCOP)	Pezizomycotina (1PEZIQ)	Dothideomycetes (1DOTHC)							Ulmus	1870	1878	1754	29	1906			1878	1878	1753		1			1
Epicoccum nigrum	Epicoccum purpurascens	Link (1816)	Fungi (1FUNGK)	Ascomycota (1ASCOP)	Pezizomycotina (1PEZIQ)	Dothideomycetes (1DOTHC)	Pleosporomycetidae (1PLEOL)	Pleosporales (1PLEOO)		Didymellaceae (1DIDYF)		Epicoccum (1EPCCG)		1840	1878	1755	30	1906			1878	1878	1754		1			1
Erysiphe adunca var. adunca	Uncinula adunca		Fungi (1FUNGK)	Ascomycota (1ASCOP)	Pezizomycotina (1PEZIQ)	Leotiomycetes (1LETOC)		Erysiphales (1ERYSO)		Erysiphaceae (1ERYSF)		Microsphaera (1MCRSG)	Salix	1901	1878	1756	31	1906			1878	1878	1755		1			1
Inonotus hispidus	Polyporus hispidus		Fungi (1FUNGK)	Basidiomycota (1BASIP)		Agaricomycotina (1BASIC)	Agaricomycetes (1AGARL)	Hymenochaetales (1HYMCO)		Hymenochaetaceae (1HYMCF)		Inonotus (1INONG)	Fraxinus	1791	1878	1757	32	1907			1878	1878	1756		1			1
Lachnellula calycina	Dasyscypha calycina; Trichoscyphella calycina	(Schumach.) Sacc. (1889)	Fungi (1FUNGK)	Ascomycota (1ASCOP)	Pezizomycotina (1PEZIQ)	Leotiomycetes (1LETOC)		Helotiales (1HELOO)		Hyaloscyphaceae (1HYASF)		Lachnellula (1LCHNG)		1866	1878	1758	33	1907			1878	1878	1757		1			1
Laetiporus sulphureus	Polyporus sulphureus	(Bull.) Murrill,	Fungi (1FUNGK)	Basidiomycota (1BASIP)		Agaricomycotina (1BASIC)	Agaricomycetes (1AGARL)	Polyporales (1PORIO)		Fomitopsidaceae (1FOMIF)		Laetiporus (1LAETG)	Quercus	1786	1878	1759	34	1907			1878	1878	1758		1			1
Melampsora epitea			Fungi (1FUNGK)	Basidiomycota (1BASIP)		Pucciniomycotina (1TELIC)	Pucciniomycetes (1PUCCL)	Pucciniales (1UREDO)		Melampsoraceae (1MELMF)		Melampsora (1MELMG)	Salix	1865	1878	1760	35	1908			1883	1878	1759		1			1
Sawadaea bicornis	Uncinula aceris, Uncinula bicornis		Fungi (1FUNGK)	Ascomycota (1ASCOP)	Pezizomycotina (1PEZIQ)	Leotiomycetes (1LETOC)		Erysiphales (1ERYSO)		Erysiphaceae (1ERYSF)		Sawadaea (1SAWDG)	Acer	1889	1878	1761	36	1910			1883	1878	1760		1			1
Tranzschelia discolor			Fungi (1FUNGK)	Basidiomycota (1BASIP)		Pucciniomycotina (1TELIC)	Pucciniomycetes (1PUCCL)	Pucciniales (1UREDO)		Uropyxidaceae (1URPXF)		Tranzschelia (1TRANG)	Prunus	1828	1878	1762	37	1910			1883	1878	1761		1			1
Prays fraxinella	Prays curtisellus		Animalia (1ANIMK)	Arthropoda (1ARTHP)	Hexapoda (1HEXAQ)	Insecta (1INSEC)		Lepidoptera (1LEPIO)		Yponomeutidae (1YPONF)		Prays (1PRAYG)		1879	1879	1763	38	1910			1884	1879	1762		1			1
Melampsoridium betulinum	Melampsora betulinum, Melampsoridium hiratsukanum	(Pers.) Kleb. (1899);	Fungi (1FUNGK)	Basidiomycota (1BASIP)		Pucciniomycotina (1TELIC)	Pucciniomycetes (1PUCCL)	Pucciniales (1UREDO)		Pucciniastraceae (1PUCIF)		Melampsoridium (1MELDG)	Betula, Larix, Alnus	1797	1883	1764	39	1911			1884	1883	1763		1			1
Naohidemyces vaccinii	Pucciniastrum vaccinii, Naohidemyces vacciniorum		Fungi (1FUNGK)	Basidiomycota (1BASIP)		Pucciniomycotina (1TELIC)	Pucciniomycetes (1PUCCL)	Pucciniales (1UREDO)		Pucciniastraceae (1PUCIF)		Naohidemyces (1NAOHG)	Tsuga	1865	1883	1765	40	1914			1884	1883	1764		1			1
Pseudoinonotus dryadeus	Inonotus dryadeus , Polyporus dryadeus	(Pers.) T. Wagner & M. Fisch.,	Fungi (1FUNGK)	Basidiomycota (1BASIP)		Agaricomycotina (1BASIC)	Agaricomycetes (1AGARL)	Hymenochaetales (1HYMCO)		Hymenochaetaceae (1HYMCF)			Quercus	1853	1883	1766	41	1914			1884	1883	1765		1			1
Cladosporium herbarum		(Pers.) Link,	Fungi (1FUNGK)	Ascomycota (1ASCOP)	Pezizomycotina (1PEZIQ)	Dothideomycetes (1DOTHC)	Dothideomycetidae (1DTHDL)	Capnodiales (1CAPDO)		Mycosphaerellaceae (1MYCOF)		Davidiella (1DAVIG)		1866	1884	1767	42	1914			1884	1884	1766		1			1
Hysterographium fraxini			Fungi (1FUNGK)	Ascomycota (1ASCOP)	Pezizomycotina (1PEZIQ)	Dothideomycetes (1DOTHC)		Hysteriales (1HYSTO)		Hysteriaceae (1HYSTF)		Hysterographium (1HYSGG)	Fraxinus	1798	1884	1768	43	1916			1890	1884	1767		1			1
Neonectria coccinea	nectria coccinea		Fungi (1FUNGK)	Ascomycota (1ASCOP)	Pezizomycotina (1PEZIQ)	Sordariomycetes (1SORDC)	Hypocreomycetidae (1HYPRL)	Hypocreales (1HYPRO)		Nectriaceae (1NECTF)		Neonectria (1NNECG)	Fagus	1789	1884	1769	44	1919			1893	1884	1768		1			1
Stigmina carpophila		(Lév.) M.B. Ellis (1959)	Fungi (1FUNGK)	Ascomycota (1ASCOP)	Pezizomycotina (1PEZIQ)	Dothideomycetes (1DOTHC)	Pleosporomycetidae (1PLEOL)	Pleosporales (1PLEOO)		Dothidotthiaceae (1DOTTF)		Wilsonomyces (anamorphic genus) (1WILSG)		1864	1884	1770	45	1919			1893	1884	1769		1			1
Trichothecium roseum			Fungi (1FUNGK)	Ascomycota (1ASCOP)	Pezizomycotina (1PEZIQ)	Sordariomycetes (1SORDC)	Hypocreomycetidae (1HYPRL)	Hypocreales (1HYPRO)				Trichothecium (anamorphic genus) (1TRITG)		1899	1884	1771	46	1920			1900	1884	1770		1			1
Tomicus piniperda	Hylurgus piniperda; Mylophilus piniperda		Animalia (1ANIMK)	Arthropoda (1ARTHP)	Hexapoda (1HEXAQ)	Insecta (1INSEC)		Coleoptera (1COLEO)		Scolytidae (1SCOLF)		Tomicus (1TOMSG)	Pinus contorta	1891	1885	1772	47	1921			1902	1885	1771		1			1
Globisporangium ultimum	Pythium debaryanum; Globisporangium debaryanum	(R. Hesse) Uzuhashi, Tojo & Kakish.,	Chromista (1CHROK)	Pseudofungi (1PSDFP)		Oomycetes (1OOMYC)		Pythiales (1PYTHO)		Pythiaceae (1PYTHF)		Pythium (1PYTHG)	Larix, Pinus, Nothofagus	1899	1888	1773	48	1923			1902	1888	1772		1			1
Hylobius abietis			Animalia (1ANIMK)	Arthropoda (1ARTHP)	Hexapoda (1HEXAQ)	Insecta (1INSEC)		Coleoptera (1COLEO)		Curculionidae (1CURCF)		Hylobius (1HYLOG)	Pinus, Picea, Larix, Pseudotsuga	1848	1890	1774	49	1924			1903	1890	1773		1			1
Taphrina betulina	Exoascus betulinus	Rostr. (1883);	Fungi (1FUNGK)	Ascomycota (1ASCOP)	Taphrinomycotina (1TAPHQ)	Taphrinomycetes (1TAPNC)		Taphrinales (1TAPHO)		Taphrinaceae (1TAPHF)		Taphrina (1TAPHG)	Betula	1903	1890	1775	50	1930			1910	1890	1774		1			1
Pityogenes bidentatus			Animalia (1ANIMK)	Arthropoda (1ARTHP)	Hexapoda (1HEXAQ)	Insecta (1INSEC)		Coleoptera (1COLEO)		Scolytidae (1SCOLF)		Pityogenes (1PITYG)	Pinus	1848	1892	1776	51	1931			1910	1892	1775		1			1
Galerucella lineola			Animalia (1ANIMK)	Arthropoda (1ARTHP)	Hexapoda (1HEXAQ)	Insecta (1INSEC)		Coleoptera (1COLEO)		Chrysomelidae (1CHRYF)		Pyrrhalta (1PYRTG)		1930	1893	1777	52	1933			1910	1893	1776		1			1
Hylesinus fraxinii	Hylesium fraxini, Leperisinus varius		Animalia (1ANIMK)	Arthropoda (1ARTHP)	Hexapoda (1HEXAQ)	Insecta (1INSEC)		Coleoptera (1COLEO)		Scolytidae (1SCOLF)		Hylesinus (1HYESG)	Fraxinus	1884	1893	1778	53	1935			1910	1893	1777		1			1
Gibberella pulicaris	Fusarium sambucinum		Fungi (1FUNGK)	Ascomycota (1ASCOP)	Pezizomycotina (1PEZIQ)	Sordariomycetes (1SORDC)	Hypocreomycetidae (1HYPRL)	Hypocreales (1HYPRO)		Nectriaceae (1NECTF)		Gibberella (1GIBBG)	Salix	1840	1893	1779	54	1936			1910	1893	1778		1			1
Taphrina deformans		(Berk.) Tul. (1866)	Fungi (1FUNGK)	Ascomycota (1ASCOP)	Taphrinomycotina (1TAPHQ)	Taphrinomycetes (1TAPNC)		Taphrinales (1TAPHO)		Taphrinaceae (1TAPHF)		Taphrina (1TAPHG)	Prunus	1888	1893	1780	55	1936			1911	1893	1779		1			1
Dascillus cervinus			Animalia (1ANIMK)	Arthropoda (1ARTHP)	Hexapoda (1HEXAQ)	Insecta (1INSEC)		Coleoptera (1COLEO)		Dascillidae (1DASLF)		Dascillus (1DASLG)		1819	1894	1781	56	1937			1911	1894	1780		1			1
Dreyfusia piceae	Adelghes piceae, Chermes piceae		Animalia (1ANIMK)	Arthropoda (1ARTHP)	Hexapoda (1HEXAQ)	Insecta (1INSEC)		Hemiptera (1HEMIO)	Sternorrhyncha (1STERR)	Adelgidae (1ADLGF)		Dreyfusia (1DREYG)	Picea	1882	1895	1782	57	1938			1912	1895	1781		1			1
Hylurgops palliatus	Hylastes palliatus		Animalia (1ANIMK)	Arthropoda (1ARTHP)	Hexapoda (1HEXAQ)	Insecta (1INSEC)		Coleoptera (1COLEO)		Scolytidae (1SCOLF)		Hylurgops (1HYLUG)	Picea, Larix, Pinus	1848	1895	1783	58	1939			1912	1895	1782		1			1
Bupalus piniaria			Animalia (1ANIMK)	Arthropoda (1ARTHP)	Hexapoda (1HEXAQ)	Insecta (1INSEC)		Lepidoptera (1LEPIO)		Geometridae (1GEOMF)		Bupalus (1BUPAG)	Pinus	1949	1897	1784	59	1940			1918	1897	1783		1			1
Plagiodera versicolora			Animalia (1ANIMK)	Arthropoda (1ARTHP)	Hexapoda (1HEXAQ)	Insecta (1INSEC)		Coleoptera (1COLEO)		Chrysomelidae (1CHRYF)		Plagiodera (1PLAGG)		1945	1898	1785	60	1940			1918	1898	1784		1			1
Anoplus plantaris			Animalia (1ANIMK)	Arthropoda (1ARTHP)	Hexapoda (1HEXAQ)	Insecta (1INSEC)		Coleoptera (1COLEO)		Curculionidae (1CURCF)			Betula	1945	1900	1786	61	1941			1918	1900	1785		1			1
Anoplus roboris			Animalia (1ANIMK)	Arthropoda (1ARTHP)	Hexapoda (1HEXAQ)	Insecta (1INSEC)		Coleoptera (1COLEO)		Curculionidae (1CURCF)			Quercus	1882	1900	1787	62	1941			1919	1900	1786		1			1
Cryptococcus fagisuga	Cryptococcus fagi		Animalia (1ANIMK)	Arthropoda (1ARTHP)	Hexapoda (1HEXAQ)	Insecta (1INSEC)		Hemiptera (1HEMIO)	Sternorrhyncha (1STERR)	Eriococcidae (1ERICF)		Cryptococcus (1CRYCG)	Fagus	1908	1900	1788	63	1941			1919	1900	1787		1			1
Phyllobius argentatus			Animalia (1ANIMK)	Arthropoda (1ARTHP)	Hexapoda (1HEXAQ)	Insecta (1INSEC)		Coleoptera (1COLEO)		Curculionidae (1CURCF)		Phyllobius (1PLLBG)		1884	1900	1789	64	1942			1920	1900	1788		1			1
Melanconis stilbostoma	Melanconium betulinum		Fungi (1FUNGK)	Ascomycota (1ASCOP)	Pezizomycotina (1PEZIQ)	Sordariomycetes (1SORDC)	Sordariomycetidae (1SRDAL)	Diaporthales (1DIAPO)					Betula	1900	1900	1790	65	1942			1924	1900	1789		1			1
Chrysolina hyperici			Animalia (1ANIMK)	Arthropoda (1ARTHP)	Hexapoda (1HEXAQ)	Insecta (1INSEC)		Coleoptera (1COLEO)		Chrysomelidae (1CHRYF)		Chrysolina (1CRYSG)		1827	1902	1791	66	1943			1924	1902	1790		1			1
Magdalis armigera			Animalia (1ANIMK)	Arthropoda (1ARTHP)	Hexapoda (1HEXAQ)	Insecta (1INSEC)		Coleoptera (1COLEO)		Curculionidae (1CURCF)		Magdalis (1MAGDG)	ulmus	1945	1902	1792	67	1943			1925	1902	1791		1			1
Urocerus gigas	Sirex gigas		Animalia (1ANIMK)	Arthropoda (1ARTHP)	Hexapoda (1HEXAQ)	Insecta (1INSEC)		Hymenoptera (1HYMEO)		Siricidae (1SIRIF)		Urocerus (1URCEG)		1945	1902	1793	68	1943			1925	1902	1792		1			1
Pteleobius vittatus			Animalia (1ANIMK)	Arthropoda (1ARTHP)	Hexapoda (1HEXAQ)	Insecta (1INSEC)		Coleoptera (1COLEO)		Curculionidae (1CURCF)				1945	1902	1794	69	1945			1927	1902	1793		1			1
Melampsorella caryophyllacearum	aecidium elatinum	(DC.) J. Schröt. (1874);	Fungi (1FUNGK)	Basidiomycota (1BASIP)		Pucciniomycotina (1TELIC)	Pucciniomycetes (1PUCCL)	Pucciniales (1UREDO)		Pucciniastraceae (1PUCIF)		Melampsorella (1MELRG)	Abies	1837	1902	1795	70	1946			1928	1902	1794		1			1
Neonectria ditissima	Nectria ditissima, Nectria galligena	(Tul. & C. Tul.) Samuels & Rossman (2006)	Fungi (1FUNGK)	Ascomycota (1ASCOP)	Pezizomycotina (1PEZIQ)	Sordariomycetes (1SORDC)	Hypocreomycetidae (1HYPRL)	Hypocreales (1HYPRO)		Nectriaceae (1NECTF)		Neonectria (1NNECG)	Fagus, Fraxinus	1922	1902	1796	71	1947			1928	1902	1795		1			1
Chionaspis salicis			Animalia (1ANIMK)	Arthropoda (1ARTHP)	Hexapoda (1HEXAQ)	Insecta (1INSEC)		Hemiptera (1HEMIO)	Sternorrhyncha (1STERR)	Diaspididae (1DIASF)		Chionaspis (1CHIOG)	Salix	1937	1903	1797	72	1947			1929	1903	1796		1			1
Botrytis cinerea	Botrytis douglasii	Pers.,	Fungi (1FUNGK)	Ascomycota (1ASCOP)	Pezizomycotina (1PEZIQ)	Leotiomycetes (1LETOC)		Helotiales (1HELOO)		Sclerotiniaceae (1SCLEF)		Botrytis (anamorphic genus) (1BOTRG)	Pinus, Sequoia, Larix,	1902	1903	1798	73	1947			1929	1903	1797		1			1
Coleophora laricella			Animalia (1ANIMK)	Arthropoda (1ARTHP)	Hexapoda (1HEXAQ)	Insecta (1INSEC)		Lepidoptera (1LEPIO)		Coleophoridae (1COLEF)		Coleophora (1COLEG)	Larix	1876	1904	1799	74	1947			1931	1904	1798		1			1
Orgyia antique			Animalia (1ANIMK)	Arthropoda (1ARTHP)	Hexapoda (1HEXAQ)	Insecta (1INSEC)		Lepidoptera (1LEPIO)		Erebidae (1EREBF)				1945	1904	1800	75	1947			1931	1904	1799		1			1
Rhabdophaga heterobia			Animalia (1ANIMK)	Arthropoda (1ARTHP)	Hexapoda (1HEXAQ)	Insecta (1INSEC)		Diptera (1DIPTO)		Cecidomyiidae (1CECIF)		Rabdophaga (1RHABG)	Salix	1945	1904	1801	76	1947			1931	1904	1800		2			2
Tortrix viridana			Animalia (1ANIMK)	Arthropoda (1ARTHP)	Hexapoda (1HEXAQ)	Insecta (1INSEC)		Lepidoptera (1LEPIO)		Tortricidae (1TORTF)		Tortrix (1TORTG)	Quercus	1945	1904	1802	77	1947			1931	1904	1801		2			2
Caradrina clavipalpis	Caradrina quadripuncta		Animalia (1ANIMK)	Arthropoda (1ARTHP)	Hexapoda (1HEXAQ)	Insecta (1INSEC)		Lepidoptera (1LEPIO)		Noctuidae (1NOCTF)		Caradrina (1CRADG)	Salix	1850	1905	1803	78	1948			1933	1905	1802		2			2
Diprion pini	Lophyrus pini		Animalia (1ANIMK)	Arthropoda (1ARTHP)	Hexapoda (1HEXAQ)	Insecta (1INSEC)		Hymenoptera (1HYMEO)		Diprionidae (1DIPRF)		Diprion (1DIPRG)	Pinus	1919	1906	1804	79	1961			1933	1906	1803		2			2
Phratora vulgatissima	Phyllodecta vulgatissima		Animalia (1ANIMK)	Arthropoda (1ARTHP)	Hexapoda (1HEXAQ)	Insecta (1INSEC)		Coleoptera (1COLEO)		Chrysomelidae (1CHRYF)		Phratora (1PHRRG)	Salix, Populus	1948	1906	1805	80	1964			1934	1906	1804		4			4
Pristiphora erichsonii	Lygaeonematus erichsoni, Nematus erichsonii		Animalia (1ANIMK)	Arthropoda (1ARTHP)	Hexapoda (1HEXAQ)	Insecta (1INSEC)		Hymenoptera (1HYMEO)		Tenthredinidae (1TENTF)		Pristiphora (1PRISG)	Larix	1906	1906	1806	81	1964			1934	1906	1805		4			4
Adelges abietis			Animalia (1ANIMK)	Arthropoda (1ARTHP)	Hexapoda (1HEXAQ)	Insecta (1INSEC)		Hemiptera (1HEMIO)	Sternorrhyncha (1STERR)	Adelgidae (1ADLGF)		Sacchiphantes (1SACHG)	Picea	1911	1907	1807	82	1965			1934	1907	1806		4			4
Nematus melanaspis	nematus maculiger; Pteronus melanapsis		Animalia (1ANIMK)	Arthropoda (1ARTHP)	Hexapoda (1HEXAQ)	Insecta (1INSEC)		Hymenoptera (1HYMEO)		Tenthredinidae (1TENTF)		Pteronidea (1PTRDG)	Populus, Salix, Betula	1945	1907	1808	83	1966			1935	1907	1807		4			4
Yponomeuta padella			Animalia (1ANIMK)	Arthropoda (1ARTHP)	Hexapoda (1HEXAQ)	Insecta (1INSEC)		Lepidoptera (1LEPIO)		Yponomeutidae (1YPONF)		Yponomeuta (1HYPNG)	Crataegus	1945	1907	1809	84	1968			1935	1907	1808		4			4
Phalera bucephala	Pygaera buciphala		Animalia (1ANIMK)	Arthropoda (1ARTHP)	Hexapoda (1HEXAQ)	Insecta (1INSEC)		Lepidoptera (1LEPIO)		Notodontidae (1NOTOF)		Phalera (1PHALG)	Quercus, Salix, Ulmus; Tilia	1945	1908	1810	85	1968			1936	1908	1809		4			4
Cryphalus abietis			Animalia (1ANIMK)	Arthropoda (1ARTHP)	Hexapoda (1HEXAQ)	Insecta (1INSEC)		Coleoptera (1COLEO)		Scolytidae (1SCOLF)		Cryphalus (1CRYHG)	Picea, Pseudotsuga, Abies	1919	1910	1811	86	1968			1936	1910	1810		4			4
Hylesinus crenatus			Animalia (1ANIMK)	Arthropoda (1ARTHP)	Hexapoda (1HEXAQ)	Insecta (1INSEC)		Coleoptera (1COLEO)		Scolytidae (1SCOLF)		Hylesinus (1HYESG)	Fraxinus	1888	1910	1812	87	1968			1936	1910	1811		4			4
Megastigmus strobilobius			Animalia (1ANIMK)	Arthropoda (1ARTHP)	Hexapoda (1HEXAQ)	Insecta (1INSEC)		Hymenoptera (1HYMEO)		Torymidae (1TORYF)		Megastigmus (1MEGSG)	Picea, Abies		1910	1813	88	1968			1936	1910	1812		4			4
Cucurbitaria piceae	Gemmamyces piceae	Borthw.,	Fungi (1FUNGK)	Ascomycota (1ASCOP)	Pezizomycotina (1PEZIQ)	Dothideomycetes (1DOTHC)	Pleosporomycetidae (1PLEOL)	Pleosporales (1PLEOO)		Cucurbitariaceae (1CUCBF)		Cucurbitaria (1CUCBG)	Picea	1906	1910	1814	89	1968			1938	1910	1813		4			4
Diaporthe crustosa	Phomopsis crustosa		Fungi (1FUNGK)	Ascomycota (1ASCOP)	Pezizomycotina (1PEZIQ)	Sordariomycetes (1SORDC)	Sordariomycetidae (1SRDAL)	Diaporthales (1DIAPO)		Diaporthaceae (1DIAPF)		Diaporthe (1DIAPG)	Ilex	1910	1910	1815	90	1968			1952	1910	1814		4			4
Fomitopsis pinicola		(Sw.) P. Karst. (1881);	Fungi (1FUNGK)	Basidiomycota (1BASIP)		Agaricomycotina (1BASIC)	Agaricomycetes (1AGARL)	Polyporales (1PORIO)		Fomitopsidaceae (1FOMIF)		Fomitopsis (1FOMIG)		1938	1910	1816	91	1968			1954	1910	1815		4			4
Rhizoctonia solani	Thanatephorus cucumeris		Fungi (1FUNGK)	Basidiomycota (1BASIP)		Agaricomycotina (1BASIC)	Agaricomycetes (1AGARL)	Ceratobasidiales (1CRTBO)		Ceratobasidiaceae (1CRTBF)		Thanatephorus (1THAPG)	Cupressocyparis leylandii	1880	1910	1817	92	1968			1955	1910	1816		4			4
Stereum gausapatum		(Fr.) Fr. (1874);	Fungi (1FUNGK)	Basidiomycota (1BASIP)		Agaricomycotina (1BASIC)	Agaricomycetes (1AGARL)	Russulales (1RUSSO)		Stereaceae (1STERF)		Stereum (1STERG)	Quercus	1877	1910	1818	93	1968			1957	1910	1817		4			4
Blastobasis adustella	Blastobasis lignea		Animalia (1ANIMK)	Arthropoda (1ARTHP)	Hexapoda (1HEXAQ)	Insecta (1INSEC)		Lepidoptera (1LEPIO)	Glossata	Blastobasidae				1900	1911	1819	94	1968			1957	1911	1818		4			4
Cronartium pini	Cronartium flaccidum; Peridermium pini		Fungi (1FUNGK)	Basidiomycota (1BASIP)		Pucciniomycotina (1TELIC)	Pucciniomycetes (1PUCCL)	Pucciniales (1UREDO)		Cronartiaceae (1CRONF)		Cronartium (1CRONG)	Pinus	1858	1911	1820	95	1968			1958	1911	1819		4			4
Pestalotiopsis guepinii	Pestalotia macrotricha		Fungi (1FUNGK)	Ascomycota (1ASCOP)	Pezizomycotina (1PEZIQ)	Sordariomycetes (1SORDC)	Xylariomycetidae (1XYLAL)	Amphisphaeriales (1AMPSO)		Amphisphaeriaceae (1AMPSF)		Pestalotiopsis (anamorphic genus) (1PESPG)	Rhododendron	1923	1911	1821	96	1968			1960	1911	1820		4			4
Melampsora laricis-pentandrae			Fungi (1FUNGK)	Basidiomycota (1BASIP)		Pucciniomycotina (1TELIC)	Pucciniomycetes (1PUCCL)	Pucciniales (1UREDO)		Melampsoraceae (1MELMF)		Melampsora (1MELMG)	Salix	1975	1912	1822	97	1968			1963	1912	1821		4			4
Plagiostoma salicellum	Cryptodiaporthe salicella		Fungi (1FUNGK)	Ascomycota (1ASCOP)	Pezizomycotina (1PEZIQ)	Sordariomycetes (1SORDC)	Sordariomycetidae (1SRDAL)	Diaporthales (1DIAPO)		Gnomoniaceae (1GNOMF)		Plagiostoma (1PLGTG)	Salix	1885	1912	1823	98	1968			1964	1912	1822		4			4
Cryptorhynchus lapathi			Animalia (1ANIMK)	Arthropoda (1ARTHP)	Hexapoda (1HEXAQ)	Insecta (1INSEC)		Coleoptera (1COLEO)		Curculionidae (1CURCF)		Cryptorhynchus (1CRYPG)	Populus	1762	1914	1824	99	1968			1965	1914	1823		4			4
Elatobium abietinum	Neomyzaphis abietina		Animalia (1ANIMK)	Arthropoda (1ARTHP)	Hexapoda (1HEXAQ)	Insecta (1INSEC)		Hemiptera (1HEMIO)	Sternorrhyncha (1STERR)	Aphididae (1APHIF)		Elatobium (1ELATG)	Picea	1849	1914	1825	100	1968			1967	1914	1824		4			4
Melolontha hippocastani			Animalia (1ANIMK)	Arthropoda (1ARTHP)	Hexapoda (1HEXAQ)	Insecta (1INSEC)		Coleoptera (1COLEO)		Scarabaeidae (1SCARF)		Melolontha (1MELOG)		1945	1914	1826	101	1968			1967	1914	1825		4			4
Cimbex femoratus	Cimbex sylvarum	Linnaeus, 1758	Animalia (1ANIMK)	Arthropoda (1ARTHP)	Hexapoda (1HEXAQ)	Insecta (1INSEC)		Hymenoptera (1HYMEO)		Cimbicidae			Alnus	1945	1916	1827	102	1968			1967	1916	1826		4			4
Chrysomyxa abietis		(Wallr.) Unger,	Fungi (1FUNGK)	Basidiomycota (1BASIP)		Pucciniomycotina (1TELIC)	Pucciniomycetes (1PUCCL)	Pucciniales (1UREDO)		Coleosporiaceae (1COLSF)		Chrysomyxa (1CHMYG)	Picea	1925	1918	1828	103	1968			1968	1918	1827		4			4
Chrysomyxa ledi var. rhododendri			Fungi (1FUNGK)	Basidiomycota (1BASIP)		Pucciniomycotina (1TELIC)	Pucciniomycetes (1PUCCL)	Pucciniales (1UREDO)		Coleosporiaceae (1COLSF)		Chrysomyxa (1CHMYG)	Picea	1913	1918	1829	104	1968			1968	1918	1828		4			4
Pestalotiopsis funerea		(Desm.) Steyaert (1949);	Fungi (1FUNGK)	Ascomycota (1ASCOP)	Pezizomycotina (1PEZIQ)	Sordariomycetes (1SORDC)	Xylariomycetidae (1XYLAL)	Amphisphaeriales (1AMPSO)		Amphisphaeriaceae (1AMPSF)		Pestalotiopsis (anamorphic genus) (1PESPG)	Cupressocyparis leylandii, Thuja, Cuppressus macrocarpa	1885	1918	1830	105	1968			1968	1918	1829		4			4
Argyresthia laevigatella	Argyresthia atmoriella		Animalia (1ANIMK)	Arthropoda (1ARTHP)	Hexapoda (1HEXAQ)	Insecta (1INSEC)		Lepidoptera (1LEPIO)		Yponomeutidae (1YPONF)		Argyresthia (1ARGYG)	Larix	1922	1919	1831	106	1968			1968	1919	1830		4			4
Magdalis carbonaria			Animalia (1ANIMK)	Arthropoda (1ARTHP)	Hexapoda (1HEXAQ)	Insecta (1INSEC)		Coleoptera (1COLEO)		Curculionidae (1CURCF)		Magdalis (1MAGDG)	Betula	1945	1919	1832	107	1968			1970	1919	1831		4			4
Didymascella thujina	Keithia thujina	(E.J. Durand) Maire (1927);	Fungi (1FUNGK)	Ascomycota (1ASCOP)	Pezizomycotina (1PEZIQ)	Leotiomycetes (1LETOC)		Helotiales (1HELOO)		Hemiphacidiaceae (1HEMPF)		Didymascella (1DIDSG)	Thuja plicata	1919	1919	1833	108	1968			1971	1919	1832		4			4
Meloderma desmazieri	Hypoderma desmazieri		Fungi (1FUNGK)	Ascomycota (1ASCOP)	Pezizomycotina (1PEZIQ)	Leotiomycetes (1LETOC)		Rhytismatales (1RHYTO)		Rhytismataceae (1RHYTF)		Meloderma (1MEDMG)	Pinus	1905	1919	1834	109	1968			1971	1919	1833		5			4	1
Melolontha melolontha			Animalia (1ANIMK)	Arthropoda (1ARTHP)	Hexapoda (1HEXAQ)	Insecta (1INSEC)		Coleoptera (1COLEO)		Scarabaeidae (1SCARF)		Melolontha (1MELOG)	Quercus	1782	1920	1835	110	1968			1971	1920	1834		5			4	1
Cronartium ribicola	Peridermium strobi	J.C. Fisch. (1872);	Fungi (1FUNGK)	Basidiomycota (1BASIP)		Pucciniomycotina (1TELIC)	Pucciniomycetes (1PUCCL)	Pucciniales (1UREDO)		Cronartiaceae (1CRONF)		Cronartium (1CRONG)	Pinus, Pinus strobus, Ribes	1892	1920	1836	111	1968			1972	1920	1835		5			4	1
Monsoma pulveratum	Monosoma pulverata; Monsoma pulverata		Animalia (1ANIMK)	Arthropoda (1ARTHP)	Hexapoda (1HEXAQ)	Insecta (1INSEC)		Hymenoptera (1HYMEO)		Tenthredinidae (1TENTF)			Alnus, Salix	1945	1921	1837	112	1968			1972	1921	1836		6			5	1
Phytophthora syringae		(Kleb.) Kleb. 1909	Chromista (1CHROK)	Pseudofungi (1PSDFP)		Oomycetes (1OOMYC)		Peronosporales (1PEROO)		Peronosporaceae (1PEROF)		Phytophthora (1PHYTG)		1930	1922	1838	113	1968			1972	1922	1837		7			6	1
Phratora vitellinae	Phyllodecta vitellinae		Animalia (1ANIMK)	Arthropoda (1ARTHP)	Hexapoda (1HEXAQ)	Insecta (1INSEC)		Coleoptera (1COLEO)		Chrysomelidae (1CHRYF)		Phratora (1PHRRG)		1948	1923	1839	114	1968			1974	1923	1838		7			6	1
Tuberolachnus salignus			Animalia (1ANIMK)	Arthropoda (1ARTHP)	Hexapoda (1HEXAQ)	Insecta (1INSEC)		Hemiptera (1HEMIO)	Sternorrhyncha (1STERR)	Aphididae (1APHIF)		Tuberolachnus (1TUBRG)	Salix	1919	1924	1840	115	1968			1975	1924	1839		7			6	1
Ceratocystis minor	Ceratocystis pini		Fungi (1FUNGK)	Ascomycota (1ASCOP)	Pezizomycotina (1PEZIQ)	Sordariomycetes (1SORDC)	Sordariomycetidae (1SRDAL)	Ophiostomatales (1OPHIO)		Ophiostomataceae (1OPHIF)		Ophiostoma (1OPHSG)	Pinus	1969	1924	1841	116	1968			1976	1924	1840		14			13	1
Ophiostoma piceae	Ceratocystis piceae; Pesotum piceae		Fungi (1FUNGK)	Ascomycota (1ASCOP)	Pezizomycotina (1PEZIQ)	Sordariomycetes (1SORDC)	Sordariomycetidae (1SRDAL)	Ophiostomatales (1OPHIO)		Ophiostomataceae (1OPHIF)		Ophiostoma (1OPHSG)	Pinus	1923	1924	1842	117	1968			1977	1924	1841		14			13	1
Erysiphe alphitoides	Microsphaera alphitoides; Oidium quercinum	(Griffon & Maubl.) U. Braun & S. Takam.,	Fungi (1FUNGK)	Ascomycota (1ASCOP)	Pezizomycotina (1PEZIQ)	Leotiomycetes (1LETOC)		Erysiphales (1ERYSO)		Erysiphaceae (1ERYSF)		Microsphaera (1MCRSG)	Quercus	1908	1925	1843	118	1968			1978	1925	1842		14			13	1
Rhizosphaera kalkhoffii		Bubák,	Fungi (1FUNGK)	Ascomycota (1ASCOP)	Pezizomycotina (1PEZIQ)	Dothideomycetes (1DOTHC)	Pleosporomycetidae (1PLEOL)	Pleosporales (1PLEOO)		Venturiaceae (1VENTF)		Rhizosphaera (1RIZSG)	Abies nobilis	1914	1925	1844	119	1968			1978	1925	1843		16			15	1
Phytophthora cryptogea		Pethybr. & Laff. 1919	Chromista (1CHROK)	Pseudofungi (1PSDFP)		Oomycetes (1OOMYC)		Peronosporales (1PEROO)		Peronosporaceae (1PEROF)		Phytophthora (1PHYTG)	Chrysanthemum	1933	1926	1845	120	1968			1978	1926	1844		17			16	1
Phaeolus schweinitzii		(Fr.) Pat. (1900)	Fungi (1FUNGK)	Basidiomycota (1BASIP)		Agaricomycotina (1BASIC)	Agaricomycetes (1AGARL)	Polyporales (1PORIO)		Polyporaceae (1POLPF)		Phaeolus (1PAEOG)		1850	1927	1846	121	1968			1980	1927	1845		17			16	1
Phaeocryptopus gaeumannii	Phaecocryptus gaumanii , Adelopus gaeumannii	(T. Rohde) Petr.,	Fungi (1FUNGK)	Ascomycota (1ASCOP)	Pezizomycotina (1PEZIQ)	Dothideomycetes (1DOTHC)	Dothideomycetidae (1DTHDL)	Capnodiales (1CAPDO)		Mycosphaerellaceae (1MYCOF)		Nothophaeocryptopus (1NTHPG)	Pseudotsuga	1928	1928	1847	122	1968			1980	1928	1846		17			16	1
Rhabdocline laricis	Meria laricis	(Vuill.) Stone,	Fungi (1FUNGK)	Ascomycota (1ASCOP)	Pezizomycotina (1PEZIQ)	Leotiomycetes (1LETOC)		Helotiales (1HELOO)		Hemiphacidiaceae (1HEMPF)		Rhabdocline (1RBDCG)		1920	1928	1848	123	1968			1982	1928	1847		17			16	1
Phytophthora megasperma		Drechsler 1931	Chromista (1CHROK)	Pseudofungi (1PSDFP)		Oomycetes (1OOMYC)		Peronosporales (1PEROO)		Peronosporaceae (1PEROF)		Phytophthora (1PHYTG)	Conifers	1936	1929	1849	124	1968			1983	1929	1848		17			16	1
Chrysomyxa empetri			Fungi (1FUNGK)	Basidiomycota (1BASIP)		Pucciniomycotina (1TELIC)	Pucciniomycetes (1PUCCL)	Pucciniales (1UREDO)		Coleosporiaceae (1COLSF)		Chrysomyxa (1CHMYG)	Picea	1865	1929	1850	125	1968			1983	1929	1849		17			16	1
Phlebiopsis gigantea	Peniophora gigantea		Fungi (1FUNGK)	Basidiomycota (1BASIP)		Agaricomycotina (1BASIC)	Agaricomycetes (1AGARL)	Polyporales (1PORIO)		Phanerochaetaceae (1PHNEF)		Phlebiopsis (1PLBSG)		1881	1929	1851	126	1968			1983	1929	1850		17			16	1
Barypithes pellucidus			Animalia (1ANIMK)	Arthropoda (1ARTHP)	Hexapoda (1HEXAQ)	Insecta (1INSEC)		Coleoptera (1COLEO)		Curculionidae (1CURCF)				1855	1930	1852	127	1968			1983	1930	1851		17			16	1
Phytophthora cactorum		(Lebert & Cohn) J. Schröt. 1886	Chromista (1CHROK)	Pseudofungi (1PSDFP)		Oomycetes (1OOMYC)		Peronosporales (1PEROO)		Peronosporaceae (1PEROF)		Phytophthora (1PHYTG)	Abies, Sorbus, Malus	1915	1930	1853	128	1968			1983	1930	1852		23	1		22	1
Pityogenes chalcographus			Animalia (1ANIMK)	Arthropoda (1ARTHP)	Hexapoda (1HEXAQ)	Insecta (1INSEC)		Coleoptera (1COLEO)		Scolytidae (1SCOLF)		Pityogenes (1PITYG)	Pinus	1945	1931	1854	129	1968			1984	1931	1853		23	1		22	1
Ganoderma resinaceum		Boud. (1890);	Fungi (1FUNGK)	Basidiomycota (1BASIP)		Agaricomycotina (1BASIC)	Agaricomycetes (1AGARL)	Polyporales (1PORIO)		Ganodermataceae (1GANOF)		Ganoderma (1GANOG)		1872	1931	1855	130	1968			1986	1931	1854		25	1		22	3
Milesina blechni			Fungi (1FUNGK)	Basidiomycota (1BASIP)		Pucciniomycotina (1TELIC)	Pucciniomycetes (1PUCCL)	Pucciniales (1UREDO)		Pucciniastraceae (1PUCIF)			Abies	1899	1931	1856	131	1968			1986	1931	1855		25	1		22	3
Pucciniastrum symphyti	Melampsorella symphyti		Fungi (1FUNGK)	Basidiomycota (1BASIP)		Pucciniomycotina (1TELIC)	Pucciniomycetes (1PUCCL)	Pucciniales (1UREDO)		Pucciniastraceae (1PUCIF)		Pucciniastrum (1PUCIG)	Abies	1823	1931	1857	132	1968			1992	1931	1856		26	1		23	3
Taphrina tosquinetti			Fungi (1FUNGK)	Ascomycota (1ASCOP)	Taphrinomycotina (1TAPHQ)	Taphrinomycetes (1TAPNC)		Taphrinales (1TAPHO)		Taphrinaceae (1TAPHF)		Taphrina (1TAPHG)	Alnus	1921	1931	1858	133	1968			1992	1931	1857		26	1		23	3
Adelges cooleyi	Gilletteella cooleyi		Animalia (1ANIMK)	Arthropoda (1ARTHP)	Hexapoda (1HEXAQ)	Insecta (1INSEC)		Hemiptera (1HEMIO)	Sternorrhyncha (1STERR)	Adelgidae (1ADLGF)		Gilletteella (1GILLG)	Pseudotsuga	1913	1933	1859	134	1968			1995	1933	1858		26	1		23	3
Ramularia endophylla	Mycosphaerella punctiformis		Fungi (1FUNGK)	Ascomycota (1ASCOP)	Pezizomycotina (1PEZIQ)	Dothideomycetes (1DOTHC)	Dothideomycetidae (1DTHDL)	Capnodiales (1CAPDO)		Mycosphaerellaceae (1MYCOF)		Ramularia (anamorphic genus) (1RAMUG)	Betula	1866	1933	1860	135	1968			2000	1933	1859		26	1		23	3
Taphrina wiesneri	Taphrina cerasi		Fungi (1FUNGK)	Ascomycota (1ASCOP)	Taphrinomycotina (1TAPHQ)	Taphrinomycetes (1TAPNC)		Taphrinales (1TAPHO)		Taphrinaceae (1TAPHF)		Taphrina (1TAPHG)	Prunus	1934	1933	1861	136	1968			2000	1933	1860		26	1		23	3
Milesina kriegeriana			Fungi (1FUNGK)	Basidiomycota (1BASIP)		Pucciniomycotina (1TELIC)	Pucciniomycetes (1PUCCL)	Pucciniales (1UREDO)		Pucciniastraceae (1PUCIF)			Abies	1934	1934	1862	137	1968			2001	1934	1861		26	1		23	3
Sphaeropsis sapinea	Diplodia pinastri		Fungi (1FUNGK)	Ascomycota (1ASCOP)	Pezizomycotina (1PEZIQ)	Dothideomycetes (1DOTHC)		Botryosphaeriales (1BOTSO)		Botryosphaeriaceae (1BOTSF)		Diplodia (anamorphic genus) (1DIPDG)	Pinus	1905	1934	1863	138	1968			2001	1934	1862		26	1		23	3
Taphrina alni			Fungi (1FUNGK)	Ascomycota (1ASCOP)	Taphrinomycotina (1TAPHQ)	Taphrinomycetes (1TAPNC)		Taphrinales (1TAPHO)		Taphrinaceae (1TAPHF)		Taphrina (1TAPHG)	Alnus	1922	1934	1864	139	1968			2001	1934	1863		26	1		23	3
Dryocoetes autographus			Animalia (1ANIMK)	Arthropoda (1ARTHP)	Hexapoda (1HEXAQ)	Insecta (1INSEC)		Coleoptera (1COLEO)		Scolytidae (1SCOLF)		Dryocoetes (1DRYOG)		1934	1935	1865	140	1968			2004	1935	1864		26	1		23	3
Diaporthe eres	Phomopsis occulta		Fungi (1FUNGK)	Ascomycota (1ASCOP)	Pezizomycotina (1PEZIQ)	Sordariomycetes (1SORDC)	Sordariomycetidae (1SRDAL)	Diaporthales (1DIAPO)		Diaporthaceae (1DIAPF)		Diaporthe (1DIAPG)	Fraxinus	1835	1935	1866	141	1968			2005	1935	1865		26	1		23	3
Marssonina betulae	Gloeosporium betulae	(Lib.) Magnus,	Fungi (1FUNGK)	Ascomycota (1ASCOP)	Pezizomycotina (1PEZIQ)	Leotiomycetes (1LETOC)		Helotiales (1HELOO)					Betula	1908	1935	1867	142	1968			2009	1935	1866		26	1		23	3
Cossus cossus			Animalia (1ANIMK)	Arthropoda (1ARTHP)	Hexapoda (1HEXAQ)	Insecta (1INSEC)		Lepidoptera (1LEPIO)		Cossidae (1COSSF)		Cossus (1COSSG)		1799	1936	1868	143	1968			2011	1936	1867		27	2		24	3
Panolis flammea	pine beauty moth		Animalia (1ANIMK)	Arthropoda (1ARTHP)	Hexapoda (1HEXAQ)	Insecta (1INSEC)		Lepidoptera (1LEPIO)		Noctuidae (1NOCTF)		Panolis (1PANLG)	Pinus	1800	1936	1869	144	1968			2012	1936	1868		27	2		24	3
Hyponectria cookeana	Anisostomula cookeana		Fungi (1FUNGK)	Ascomycota (1ASCOP)	Pezizomycotina (1PEZIQ)	Sordariomycetes (1SORDC)	Xylariomycetidae (1XYLAL)						Quercus	1970	1936	1870	145	1968			2012	1936	1869		27	2		24	3
Sirococcus conigenus	Sirococcus strobilinus, Sporonema strobilinum		Fungi (1FUNGK)	Ascomycota (1ASCOP)	Pezizomycotina (1PEZIQ)	Sordariomycetes (1SORDC)	Sordariomycetidae (1SRDAL)	Diaporthales (1DIAPO)				Sirococcus (anamorphic genus) (1SIROG)	Abies	1908	1936	1871	146	1968			2012	1936	1870		27	2		24	3
Sydowia polyspora	Sclerophoma pithyophila	(Bref. & Tavel) E. Müll.,	Fungi (1FUNGK)	Ascomycota (1ASCOP)	Pezizomycotina (1PEZIQ)	Dothideomycetes (1DOTHC)	Dothideomycetidae (1DTHDL)	Dothideales (1DOTHO)		Dothioraceae (1DOTRF)		Sydowia (1SYDOG)	Pinus contorta, Pinus sylvestris	1913	1936	1872	147	1968			2016	1936	1871		27	2		24	3
Taphrina caerulescens			Fungi (1FUNGK)	Ascomycota (1ASCOP)	Taphrinomycotina (1TAPHQ)	Taphrinomycetes (1TAPNC)		Taphrinales (1TAPHO)		Taphrinaceae (1TAPHF)		Taphrina (1TAPHG)	Quercus	1905	1936	1873	148	1968			2016	1936	1872		27	2		24	3
Peribatodes rhomboidaria	Cleoa rhomboidaria		Animalia (1ANIMK)	Arthropoda (1ARTHP)	Hexapoda (1HEXAQ)	Insecta (1INSEC)		Lepidoptera (1LEPIO)		Geometridae (1GEOMF)		Peribatodes (1PERBG)		1800	1937	1874	149	1970			2017	1937	1873		27	2		24	3
Adelges nusslini			Animalia (1ANIMK)	Arthropoda (1ARTHP)	Hexapoda (1HEXAQ)	Insecta (1INSEC)		Hemiptera (1HEMIO)	Sternorrhyncha (1STERR)	Adelgidae (1ADLGF)				1973	1938	1875	150	1973				1938	1874		28	2		25	3
Fusarium avenaceum			Fungi (1FUNGK)	Ascomycota (1ASCOP)	Pezizomycotina (1PEZIQ)	Sordariomycetes (1SORDC)	Hypocreomycetidae (1HYPRL)	Hypocreales (1HYPRO)		Nectriaceae (1NECTF)		Gibberella (1GIBBG)	Pinus		1938	1876	151	1973				1938	1875		28	2		25	3
Eriophyes tiliae	Eucallipterus tiliae		Animalia (1ANIMK)	Arthropoda	Chelicerata	Arachnida		Prostigmata		Eriophyidae			Tilia	1949	1939	1877	152	1973				1939	1876		28	2		25	3
Adelges laricis	Chermes laricis		Animalia (1ANIMK)	Arthropoda (1ARTHP)	Hexapoda (1HEXAQ)	Insecta (1INSEC)		Hemiptera (1HEMIO)	Sternorrhyncha (1STERR)	Adelgidae (1ADLGF)		Adelges (1ADLGG)	Larix	1906	1940	1878	153	1975				1940	1877		28	2		25	3
Eulachnus agilis			Animalia (1ANIMK)	Arthropoda (1ARTHP)	Hexapoda (1HEXAQ)	Insecta (1INSEC)		Hemiptera (1HEMIO)	Sternorrhyncha (1STERR)	Aphididae (1APHIF)		Eulachnus (1EULAG)	Pinus	1945	1940	1879	154	1976				1940	1878		37	2		34	3
Cinara costata			Animalia (1ANIMK)	Arthropoda (1ARTHP)	Hexapoda (1HEXAQ)	Insecta (1INSEC)		Hemiptera (1HEMIO)	Sternorrhyncha (1STERR)	Aphididae (1APHIF)		Cinara (1CINAG)	Picea	1952	1941	1880	155	1979				1941	1879		37	2		34	4
Dreyfusia nordmannianae	Adelges nordmannianae		Animalia (1ANIMK)	Arthropoda (1ARTHP)	Hexapoda (1HEXAQ)	Insecta (1INSEC)		Hemiptera (1HEMIO)	Sternorrhyncha (1STERR)	Adelgidae (1ADLGF)		Dreyfusia (1DREYG)	Abies	1973	1941	1881	156	1979				1941	1880		38	2		34	4
Schizolachnus pineti			Animalia (1ANIMK)	Arthropoda (1ARTHP)	Hexapoda (1HEXAQ)	Insecta (1INSEC)		Hemiptera (1HEMIO)	Sternorrhyncha (1STERR)	Aphididae (1APHIF)		Schizolachnus (1SCHLG)	Pinus	1945	1941	1882	157	1979				1941	1881		38	2		34	4
cinara pilicornis	Cinaria pinicola		Animalia (1ANIMK)	Arthropoda (1ARTHP)	Hexapoda (1HEXAQ)	Insecta (1INSEC)		Hemiptera (1HEMIO)	Sternorrhyncha (1STERR)	Aphididae (1APHIF)		Cinaropsis (1CINOG)	Picea	1841	1942	1883	158	1979				1942	1882		38	2		34	4
cinara pini			Animalia (1ANIMK)	Arthropoda (1ARTHP)	Hexapoda (1HEXAQ)	Insecta (1INSEC)		Hemiptera (1HEMIO)	Sternorrhyncha (1STERR)	Aphididae (1APHIF)		Cinara (1CINAG)		1929	1942	1884	159	1979				1942	1883		41	2		37	4
Ceramica pisi			Animalia (1ANIMK)	Arthropoda (1ARTHP)	Hexapoda (1HEXAQ)	Insecta (1INSEC)		Lepidoptera (1LEPIO)		Noctuidae (1NOCTF)		Ceramica (1CRMCG)	Picea sitchensis	1800	1943	1885	160	1980				1943	1884		46	2		42	4
Rhyacionia buoliana	Evetria buoliana		Animalia (1ANIMK)	Arthropoda (1ARTHP)	Hexapoda (1HEXAQ)	Insecta (1INSEC)		Lepidoptera (1LEPIO)		Tortricidae (1TORTF)		Rhyacionia (1RHYAG)	Pinus	1800	1943	1886	161	1980				1943	1885		47	2		42	5
Scolytus scolytus			Animalia (1ANIMK)	Arthropoda (1ARTHP)	Hexapoda (1HEXAQ)	Insecta (1INSEC)		Coleoptera (1COLEO)		Scolytidae (1SCOLF)		Scolytus (1SCOLG)	Ulmus	1897	1943	1887	162	1981				1943	1886		47	2		42	5
Megastigmus spermotrophus			Animalia (1ANIMK)	Arthropoda (1ARTHP)	Hexapoda (1HEXAQ)	Insecta (1INSEC)		Hymenoptera (1HYMEO)		Torymidae (1TORYF)		Megastigmus (1MEGSG)	Pseudotsuga, Abies	1896	1945	1888	163	1981				1945	1887		47	2		42	5
Pineus pini	Adelges pini		Animalia (1ANIMK)	Arthropoda (1ARTHP)	Hexapoda (1HEXAQ)	Insecta (1INSEC)		Hemiptera (1HEMIO)	Sternorrhyncha (1STERR)	Adelgidae (1ADLGF)		Pineus (1PINEG)	Pinus	1937	1946	1889	164	1981				1946	1888		48	2	1	42	5
Adelges strobilobius			Animalia (1ANIMK)	Arthropoda (1ARTHP)	Hexapoda (1HEXAQ)	Insecta (1INSEC)		Hemiptera (1HEMIO)	Sternorrhyncha (1STERR)	Adelgidae (1ADLGF)		Adelges (1ADLGG)		1919	1947	1890	165	1981				1947	1889		48	2	1	42	5
Dryocoetes villosus			Animalia (1ANIMK)	Arthropoda (1ARTHP)	Hexapoda (1HEXAQ)	Insecta (1INSEC)		Coleoptera (1COLEO)		Scolytidae (1SCOLF)		Dryocoetes (1DRYOG)		1895	1947	1891	166	1982				1947	1890		50	2	1	43	6
Hylastes opacus			Animalia (1ANIMK)	Arthropoda (1ARTHP)	Hexapoda (1HEXAQ)	Insecta (1INSEC)		Coleoptera (1COLEO)		Scolytidae (1SCOLF)		Hylastes (1HYASG)		1917	1947	1892	167	1982				1947	1891		50	2	1	43	6
Otiorhynchus singularis	Otiorrhynchus picipes		Animalia (1ANIMK)	Arthropoda (1ARTHP)	Hexapoda (1HEXAQ)	Insecta (1INSEC)		Coleoptera (1COLEO)		Curculionidae (1CURCF)		Otiorhynchus (1OTIOG)		1945	1947	1893	168	1982				1947	1892		51	2	1	43	7
Phyllaphis fagi			Animalia (1ANIMK)	Arthropoda (1ARTHP)	Hexapoda (1HEXAQ)	Insecta (1INSEC)		Hemiptera (1HEMIO)	Sternorrhyncha (1STERR)	Aphididae (1APHIF)		Phyllaphis (1PHYAG)	Fagus	1945	1947	1894	169	1983				1947	1893		55	2	1	45	9
Phyllobius viridiaeris			Animalia (1ANIMK)	Arthropoda (1ARTHP)	Hexapoda (1HEXAQ)	Insecta (1INSEC)		Coleoptera (1COLEO)		Curculionidae (1CURCF)		Phyllobius (1PLLBG)		1945	1947	1895	170	1983				1947	1894		56	2	1	45	10
Strophosoma melanogrammus	Strophosomus coryli		Animalia (1ANIMK)	Arthropoda (1ARTHP)	Hexapoda (1HEXAQ)	Insecta (1INSEC)		Coleoptera (1COLEO)		Curculionidae (1CURCF)			Corylus, Rhododendron, Fagus, Picea, Larix, Pinus, Quercus	1945	1947	1896	171	1984				1947	1895		58	2	1	45	12
Harpiphorus lepidus			Animalia (1ANIMK)	Arthropoda (1ARTHP)	Hexapoda (1HEXAQ)	Insecta (1INSEC)		Hymenoptera (1HYMEO)		Tenthredinidae (1TENTF)			Quercus	1945	1948	1897	172	1984				1948	1896		58	2	1	45	12
Pseudomonas syringae pv. morsprunorum	Pseudomonas morsprunorum		Bacteria (1BACTK)	Proteobacteria (1PROBP)		Gammaproteobacteria (1GAMBC)		Pseudomonadales (1PSDMO)		Pseudomonadaceae (1PSDMF)		Pseudomonas (1PSDMG)	Prunus	1931	1952	1898	173	1987				1952	1897		59	2	1	45	13
Rhizina undulata	Rhizina inflata	Fr. (1815)	Fungi (1FUNGK)	Ascomycota (1ASCOP)	Pezizomycotina (1PEZIQ)	Pezizomycetes (1PEZZC)		Pezizales (1PEZZO)		Rhizinaceae (1RIZIF)		Rhizina (1RIZIG)	Picea, Pinus	1910	1952	1899	174	1990				1952	1898		60	2	1	45	14
Glomerella cingulata	Physalospora miyabeana; Glomerella miyabeana		Fungi (1FUNGK)	Ascomycota (1ASCOP)	Pezizomycotina (1PEZIQ)	Sordariomycetes (1SORDC)	Sordariomycetidae (1SRDAL)	Phyllachorales (1PHYRO)		Glomerellaceae (1GLOMF)		Glomerella (rejected name) (1GLOMG)	Salix	1855	1954	1900	175	1991				1954	1899		60	2	1	45	14
Ramichloridium pini		de Hoog & Rahman (1983)	Fungi (1FUNGK)	Ascomycota (1ASCOP)	Pezizomycotina (1PEZIQ)	Dothideomycetes (1DOTHC)	Dothideomycetidae (1DTHDL)	Capnodiales (1CAPDO)		Mycosphaerellaceae (1MYCOF)		Ramichloridium (anamorphic genus) (1RAMKG)	Pinus contorta	1981	1955	1901	176	1991				1955	1900		65	2	1	46	18
Allantophomopsiella pseudotsugae	Phomopsis pseudotsugae , Phacidium coniferarum	(M. Wilson) Crous	Fungi (1FUNGK)							Phacidiaceae			Pseudotsuga, Larix	1920	1957	1902	177	1991				1957	1901		65	2	1	46	18
Helicobasidium purpureum		(Tul.) Pat. (1885);	Fungi (1FUNGK)	Basidiomycota (1BASIP)		Pucciniomycotina (1TELIC)	Pucciniomycetes (1PUCCL)	Platygloeales (1PLAGO)		Platygloeaceae (1PLAGF)		Helicobasidium (1HLCBG)	Pinus contorta, Picea, Abies, Pseudotsuga menziesii	1864	1957	1903	178	1992				1957	1902		71	2	1	48	22
Ophiostoma ulmi	Ceratocystis ulmi	(Buisman) Nannf.,	Fungi (1FUNGK)	Ascomycota (1ASCOP)	Pezizomycotina (1PEZIQ)	Sordariomycetes (1SORDC)	Sordariomycetidae (1SRDAL)	Ophiostomatales (1OPHIO)		Ophiostomataceae (1OPHIF)		Ophiostoma (1OPHSG)	Ulmus	1922	1958	1904	179	1994				1958	1903		73	2	1	49	23
Drepanopeziza populorum	Marssonina populi		Fungi (1FUNGK)	Ascomycota (1ASCOP)	Pezizomycotina (1PEZIQ)	Leotiomycetes (1LETOC)		Helotiales (1HELOO)		Dermateaceae (1DERMF)		Drepanopeziza (1DREPG)	Populus	1905	1960	1905	180	1995				1960	1904		77	2	1	49	27
Aphelia viburnana	tortrix viburniana		Animalia (1ANIMK)	Arthropoda (1ARTHP)	Hexapoda (1HEXAQ)	Insecta (1INSEC)		Lepidoptera (1LEPIO)		Tortricidae (1TORTF)		Aphelia (1APELG)		1834	1961	1906	181	1995				1961	1905		78	2	1	49	28
Drepanopeziza sphaerioides	Marssonia salicicola		Fungi (1FUNGK)	Ascomycota (1ASCOP)	Pezizomycotina (1PEZIQ)	Leotiomycetes (1LETOC)		Helotiales (1HELOO)		Dermateaceae (1DERMF)		Drepanopeziza (1DREPG)	Salix	1841	1963	1907	182	1996				1963	1906		81	2	1	49	31
Cinara piceae			Animalia (1ANIMK)	Arthropoda (1ARTHP)	Hexapoda (1HEXAQ)	Insecta (1INSEC)		Hemiptera (1HEMIO)	Sternorrhyncha (1STERR)	Aphididae (1APHIF)		Cinaropsis (1CINOG)	Picea	1929	1964	1908	183	1996				1964	1907		84	2	1	49	34
Korscheltellus fusconebulosa	Hepialus fusconebulosa		Animalia (1ANIMK)	Arthropoda (1ARTHP)	Hexapoda (1HEXAQ)	Insecta (1INSEC)		Lepidoptera (1LEPIO)						1600	1964	1909	184	1996				1964	1908		85	2	1	49	35
Cryptomyces maximus			Fungi (1FUNGK)	Ascomycota (1ASCOP)	Pezizomycotina (1PEZIQ)	Leotiomycetes (1LETOC)		Rhytismatales (1RHYTO)		Rhytismataceae (1RHYTF)		Cryptomyces (1KRMYG)	Salix	1925	1964	1910	185	2000				1964	1909		85	2	1	49	35
Neodiprion sertifer			Animalia (1ANIMK)	Arthropoda (1ARTHP)	Hexapoda (1HEXAQ)	Insecta (1INSEC)		Hymenoptera (1HYMEO)		Diprionidae (1DIPRF)		Neodiprion (1NEODG)	Pinus	1920	1965	1911	186	2000				1965	1910		93	2	1	54	38
Apiognomonia errabunda	gloeosporium tiliae		Fungi (1FUNGK)	Ascomycota (1ASCOP)	Pezizomycotina (1PEZIQ)	Sordariomycetes (1SORDC)	Sordariomycetidae (1SRDAL)	Diaporthales (1DIAPO)		Valsaceae (1VALSF)		Apiognomonia (1APIGG)	Tilia, Quercus	1865	1965	1912	187	2000				1965	1911		96	2	1	56	39
Phyllobius pyri			Animalia (1ANIMK)	Arthropoda (1ARTHP)	Hexapoda (1HEXAQ)	Insecta (1INSEC)		Coleoptera (1COLEO)		Curculionidae (1CURCF)		Phyllobius (1PLLBG)	Betula, Populus	1945	1966	1913	188	2001				1966	1912		98	2	1	58	39
Pseudomonas savastanoi	Pseudomonas syringae pv. Savastanoi		Bacteria (1BACTK)	Proteobacteria (1PROBP)		Gammaproteobacteria (1GAMBC)		Pseudomonadales (1PSDMO)		Pseudomonadaceae (1PSDMF)		Pseudomonas (1PSDMG)	Fraxinus	1957	1967	1914	189	2001				1967	1913		98	2	1	58	39
Cyclaneusma minus	Naemacyclus niveus	(Butin) DiCosmo, Peredo & Minter (1983)	Fungi (1FUNGK)	Ascomycota (1ASCOP)	Pezizomycotina (1PEZIQ)	Leotiomycetes (1LETOC)		Rhytismatales (1RHYTO)		Rhytismataceae (1RHYTF)		Cyclaneusma (1CYKLG)	Pinus radiata, P. contorta	1894	1967	1915	190	2001				1967	1914		101	2	1	58	42
Cytospora populina	Cytospora ambiens		Fungi (1FUNGK)	Ascomycota (1ASCOP)	Pezizomycotina (1PEZIQ)	Sordariomycetes (1SORDC)	Sordariomycetidae (1SRDAL)	Diaporthales (1DIAPO)		Valsaceae (1VALSF)			Populus	1829	1967	1916	191	2002				1967	1915		101	2	1	58	42
Pseudocamarosporium propinquum	Camarosporium propinquum		Fungi (1FUNGK)	Ascomycota (1ASCOP)	Pezizomycotina (1PEZIQ)	Dothideomycetes (1DOTHC)	Pleosporomycetidae (1PLEOL)	Pleosporales (1PLEOO)					Populus, Prunus	1915	1967	1917	192	2002				1967	1916		102	2	1	58	43
Amauronematus hedstroemi	Amauronematus tillbergi		Animalia (1ANIMK)							Tenthredinidae			Salix	1958	1968	1918	193	2002				1968	1917		102	2	1	58	43
Amauronematus histrio			Animalia (1ANIMK)							Tenthredinidae			Salix	1945	1968	1919	194	2002				1968	1918		105	2	1	61	43
Amauronematus viduatus			Animalia (1ANIMK)							Tenthredinidae			Salix	1945	1968	1920	195	2002				1968	1919		109	2	1	63	45
Apethymus braccatus			Animalia (1ANIMK)	Arthropoda (1ARTHP)	Hexapoda (1HEXAQ)	Insecta (1INSEC)		Hymenoptera (1HYMEO)		Tenthredinidae (1TENTF)			Quercus	1945	1968	1921	196	2002				1968	1920		111	2	1	64	46
Caliroa annulipes			Animalia (1ANIMK)	Arthropoda (1ARTHP)	Hexapoda (1HEXAQ)	Insecta (1INSEC)		Hymenoptera (1HYMEO)		Tenthredinidae (1TENTF)		Caliroa (1KALIG)	Quercus	1914	1968	1922	197	2003				1968	1921		112	2	1	64	47
Caliroa cerasi			Animalia (1ANIMK)	Arthropoda (1ARTHP)	Hexapoda (1HEXAQ)	Insecta (1INSEC)		Hymenoptera (1HYMEO)		Tenthredinidae (1TENTF)		Caliroa (1KALIG)	Quercus	1871	1968	1923	198	2004				1968	1922		113	2	2	64	47
Cimbex connatus	Cinbex connata	Schrank, 1776	Animalia (1ANIMK)	Arthropoda (1ARTHP)	Hexapoda (1HEXAQ)	Insecta (1INSEC)		Hymenoptera (1HYMEO)		Cimbicidae			Alnus	1945	1968	1924	199	2006				1968	1923		114	2	2	64	48
Cladius grandis	Trichiocampus viminalis; Priophorus viminalis		Animalia (1ANIMK)	Arthropoda (1ARTHP)	Hexapoda (1HEXAQ)	Insecta (1INSEC)		Hymenoptera (1HYMEO)		Tenthredinidae (1TENTF)			Populus	1945	1968	1925	200	2006				1968	1924		117	2	2	66	49
Cladius ulmi	Priophorus laevifrons		Animalia (1ANIMK)	Arthropoda (1ARTHP)	Hexapoda (1HEXAQ)	Insecta (1INSEC)		Hymenoptera (1HYMEO)		Tenthredinidae (1TENTF)			Ulmus	1945	1968	1926	201	2006				1968	1925		119	2	2	68	49
Craesus alniastri	Croesus varus		Animalia (1ANIMK)	Arthropoda (1ARTHP)	Hexapoda (1HEXAQ)	Insecta (1INSEC)		Hymenoptera (1HYMEO)		Tenthredinidae (1TENTF)			Alnus	1951	1968	1927	202	2006				1968	1926		120	2	3	68	49
Craesus latipes	Croesus latipes		Animalia (1ANIMK)	Arthropoda (1ARTHP)	Hexapoda (1HEXAQ)	Insecta (1INSEC)		Hymenoptera (1HYMEO)		Tenthredinidae (1TENTF)			Betula, Alnus	1827	1968	1928	203	2006				1968	1927		121	2	3	69	49
Craesus septentrionalis			Animalia (1ANIMK)	Arthropoda (1ARTHP)	Hexapoda (1HEXAQ)	Insecta (1INSEC)		Hymenoptera (1HYMEO)		Tenthredinidae (1TENTF)			Alnus, Betula, Fraxinus, Populus	1827	1968	1929	204	2006				1968	1928		123	2	3	71	49
Dineura virididorsata			Animalia (1ANIMK)	Arthropoda (1ARTHP)	Hexapoda (1HEXAQ)	Insecta (1INSEC)		Hymenoptera (1HYMEO)		Tenthredinidae (1TENTF)			Betula	1890	1968	1930	205	2007				1968	1929		126	2	4	73	49
Drepanosiphum platanoidis	drepanosiphum platanoides	Koch.	Animalia (1ANIMK)	Arthropoda (1ARTHP)	Hexapoda (1HEXAQ)	Insecta (1INSEC)		Hemiptera (1HEMIO)	Sternorrhyncha (1STERR)	Aphididae (1APHIF)		Drepanosiphum (1DRESG)	Acer	1926	1968	1931	206	2008				1968	1930		128	2	5	73	50
Eriocampa ovata			Animalia (1ANIMK)	Arthropoda (1ARTHP)	Hexapoda (1HEXAQ)	Insecta (1INSEC)		Hymenoptera (1HYMEO)		Tenthredinidae (1TENTF)		Eriocampa (1ERIAG)	Alnus	1917	1968	1932	207	2009				1968	1931		133	2	5	77	51
Eriosoma ulmi			Animalia (1ANIMK)	Arthropoda (1ARTHP)	Hexapoda (1HEXAQ)	Insecta (1INSEC)		Hemiptera (1HEMIO)	Sternorrhyncha (1STERR)	Aphididae (1APHIF)		Eriosoma (1ERISG)	Ulmus	1929	1968	1933	208	2010				1968	1932		133	2	5	77	51
Euura atra			Animalia (1ANIMK)	Arthropoda (1ARTHP)	Hexapoda (1HEXAQ)	Insecta (1INSEC)		Hymenoptera (1HYMEO)		Tenthredinidae (1TENTF)		Euura (1EUURG)	Salix, Populus	1945	1968	1934	209	2010				1968	1933		136	2	5	79	52
Fenusa dohrnii	Fenusa dohrni		Animalia (1ANIMK)	Arthropoda (1ARTHP)	Hexapoda (1HEXAQ)	Insecta (1INSEC)		Hymenoptera (1HYMEO)		Tenthredinidae (1TENTF)		Fenusa (1FENUG)	Alnus	1945	1968	1935	210	2010				1968	1934		136	2	5	82	52
Fenusa pusilla			Animalia (1ANIMK)	Arthropoda (1ARTHP)	Hexapoda (1HEXAQ)	Insecta (1INSEC)		Hymenoptera (1HYMEO)		Tenthredinidae (1TENTF)		Fenusa (1FENUG)	Betula	1945	1968	1936	211	2013				1968	1935		142	2	5	84	53
Fenusella nana	Messa nana		Animalia (1ANIMK)	Arthropoda (1ARTHP)	Hexapoda (1HEXAQ)	Insecta (1INSEC)		Hymenoptera (1HYMEO)		Tenthredinidae (1TENTF)			Betula	1968	1968	1937	212	2014				1968	1936		148	2	5	88	55
Hemichroa crocea			Animalia (1ANIMK)	Arthropoda (1ARTHP)	Hexapoda (1HEXAQ)	Insecta (1INSEC)		Hymenoptera (1HYMEO)		Tenthredinidae (1TENTF)		Hemichroa (1HEMHG)	Alnus, Betula	1945	1968	1938	213	2014				1968	1937		149	2	5	88	56
Heterarthrus vagans			Animalia (1ANIMK)	Arthropoda (1ARTHP)	Hexapoda (1HEXAQ)	Insecta (1INSEC)		Hymenoptera (1HYMEO)		Tenthredinidae (1TENTF)		Heterarthrus (1HETAG)	Alnus	1945	1968	1939	214	2016				1968	1938		151	2	5	89	57
Laothoe populi	Amorpha populi		Animalia (1ANIMK)	Arthropoda (1ARTHP)	Hexapoda (1HEXAQ)	Insecta (1INSEC)		Lepidoptera (1LEPIO)		Sphingidae (1SPHIF)		Laothoe (1LAOTG)	Populus, Salix, Alnus	1945	1968	1940	215	2017				1968	1939		152	2	5	89	58
Mesoneura opaca			Animalia (1ANIMK)	Arthropoda (1ARTHP)	Hexapoda (1HEXAQ)	Insecta (1INSEC)		Hymenoptera (1HYMEO)		Tenthredinidae (1TENTF)			Quercus	1945	1968	1941	216					1968	1940		154	2	5	89	60
Nematinus acuminatus			Animalia (1ANIMK)	Arthropoda (1ARTHP)	Hexapoda (1HEXAQ)	Insecta (1INSEC)		Hymenoptera (1HYMEO)		Tenthredinidae (1TENTF)			Corylus, Betula	1945	1968	1942	217					1968	1941		157	2	5	89	63
Nematinus fuscipennis	Nematinus abdominalis		Animalia (1ANIMK)	Arthropoda (1ARTHP)	Hexapoda (1HEXAQ)	Insecta (1INSEC)		Hymenoptera (1HYMEO)		Tenthredinidae (1TENTF)			Alnus	1968	1968	1943	218					1968	1942		159	2	5	89	65
Nematinus luteus			Animalia (1ANIMK)	Arthropoda (1ARTHP)	Hexapoda (1HEXAQ)	Insecta (1INSEC)		Hymenoptera (1HYMEO)		Tenthredinidae (1TENTF)			Alnus	1945	1968	1944	219					1968	1943		162	2	5	89	68
Nematus bergmanni			Animalia (1ANIMK)	Arthropoda (1ARTHP)	Hexapoda (1HEXAQ)	Insecta (1INSEC)		Hymenoptera (1HYMEO)		Tenthredinidae (1TENTF)		Pteronidea (1PTRDG)	Salix	1968	1968	1945	220					1968	1944		163	2	5	89	68
Nematus hypoxanthus			Animalia (1ANIMK)	Arthropoda (1ARTHP)	Hexapoda (1HEXAQ)	Insecta (1INSEC)		Hymenoptera (1HYMEO)		Tenthredinidae (1TENTF)		Pteronidea (1PTRDG)	Salix, Poulus	1968	1968	1946	221					1968	1945		164	2	5	89	69
Nematus jugicola			Animalia (1ANIMK)	Arthropoda (1ARTHP)	Hexapoda (1HEXAQ)	Insecta (1INSEC)		Hymenoptera (1HYMEO)		Tenthredinidae (1TENTF)		Pteronidea (1PTRDG)	Salix	1968	1968	1947	222					1968	1946		171	2	5	89	70
Nematus leionotus			Animalia (1ANIMK)	Arthropoda (1ARTHP)	Hexapoda (1HEXAQ)	Insecta (1INSEC)		Hymenoptera (1HYMEO)		Tenthredinidae (1TENTF)		Pteronidea (1PTRDG)	Betula	1968	1968	1948	223					1968	1947		172	2	5	89	77
Nematus melanocephalus			Animalia (1ANIMK)	Arthropoda (1ARTHP)	Hexapoda (1HEXAQ)	Insecta (1INSEC)		Hymenoptera (1HYMEO)		Tenthredinidae (1TENTF)		Pteronidea (1PTRDG)	Populus, Ulmus, Betula, Salix	1968	1968	1949	224					1968	1948		172	2	5	89	78
Nematus miliaris			Animalia (1ANIMK)	Arthropoda (1ARTHP)	Hexapoda (1HEXAQ)	Insecta (1INSEC)		Hymenoptera (1HYMEO)		Tenthredinidae (1TENTF)		Pteronidea (1PTRDG)	Salix, Populus	1968	1968	1950	225					1968	1949		172	2	5	89	78
Nematus nigricornis			Animalia (1ANIMK)	Arthropoda (1ARTHP)	Hexapoda (1HEXAQ)	Insecta (1INSEC)		Hymenoptera (1HYMEO)		Tenthredinidae (1TENTF)		Pteronidea (1PTRDG)	Populus, Salix	1968	1968	1951	226					1968	1950		172	2	5	89	78
Nematus oligospilus			Animalia (1ANIMK)	Arthropoda (1ARTHP)	Hexapoda (1HEXAQ)	Insecta (1INSEC)		Hymenoptera (1HYMEO)		Tenthredinidae (1TENTF)		Nematus (1NEMAG)	Salix	1968	1968	1952	227					1968	1951		172	2	5	89	78
Nematus pavidus			Animalia (1ANIMK)	Arthropoda (1ARTHP)	Hexapoda (1HEXAQ)	Insecta (1INSEC)		Hymenoptera (1HYMEO)		Tenthredinidae (1TENTF)		Nematus (1NEMAG)		1968	1968	1953	228					1968	1952		174	2	5	90	78
Nematus polyspilus			Animalia (1ANIMK)	Arthropoda (1ARTHP)	Hexapoda (1HEXAQ)	Insecta (1INSEC)		Hymenoptera (1HYMEO)		Tenthredinidae (1TENTF)		Nematus (1NEMAG)	Alnus	1968	1968	1954	229					1968	1953		174	2	5	90	78
Nematus salicis			Animalia (1ANIMK)	Arthropoda (1ARTHP)	Hexapoda (1HEXAQ)	Insecta (1INSEC)		Hymenoptera (1HYMEO)		Tenthredinidae (1TENTF)		Nematus (1NEMAG)	Salix, Populus	1968	1968	1955	230					1968	1954		175	2	5	91	78
Nematus viridis			Animalia (1ANIMK)	Arthropoda (1ARTHP)	Hexapoda (1HEXAQ)	Insecta (1INSEC)		Hymenoptera (1HYMEO)		Tenthredinidae (1TENTF)		Nematus (1NEMAG)	Betula	1968	1968	1956	231					1968	1955		176	2	5	92	78
Operophtera brumata			Animalia (1ANIMK)	Arthropoda (1ARTHP)	Hexapoda (1HEXAQ)	Insecta (1INSEC)		Lepidoptera (1LEPIO)		Geometridae (1GEOMF)		Operophtera (1OPERG)		1945	1968	1957	232					1968	1956		176	2	5	92	78
Pachypappa vesicalis	Pachypappella piceae, Rhizomaria piceae		Animalia (1ANIMK)	Arthropoda (1ARTHP)	Hexapoda (1HEXAQ)	Insecta (1INSEC)		Hemiptera (1HEMIO)	Sternorrhyncha (1STERR)	Aphididae (1APHIF)		Pachypappa (1PACAG)	Picea sitchensis, Larix, Pinus	1945	1968	1958	233					1968	1957		178	2	5	94	78
Pacynematus scutellatus			Animalia (1ANIMK)	Arthropoda (1ARTHP)	Hexapoda (1HEXAQ)	Insecta (1INSEC)		Hymenoptera (1HYMEO)		Tenthredinidae (1TENTF)			Picea, Abies	1945	1968	1959	234					1968	1958		179	2	5	95	78
Pamphilius pallipes			Animalia (1ANIMK)	Arthropoda (1ARTHP)	Hexapoda (1HEXAQ)	Insecta (1INSEC)		Hymenoptera (1HYMEO)		Pamphiliidae			Betula	1945	1968	1960	235					1968	1959		179	2	5	95	78
Pamphilius varius			Animalia (1ANIMK)	Arthropoda (1ARTHP)	Hexapoda (1HEXAQ)	Insecta (1INSEC)		Hymenoptera (1HYMEO)		Pamphiliidae			Betula	1945	1968	1961	236					1968	1960		180	2	5	96	78
Periclista albida			Animalia (1ANIMK)	Arthropoda (1ARTHP)	Hexapoda (1HEXAQ)	Insecta (1INSEC)		Hymenoptera (1HYMEO)		Tenthredinidae (1TENTF)			Quercus	1945	1968	1962	237					1968	1961		181	2	5	96	79
Phyllobius parvulus			Animalia (1ANIMK)	Arthropoda (1ARTHP)	Hexapoda (1HEXAQ)	Insecta (1INSEC)		Coleoptera (1COLEO)		Curculionidae (1CURCF)		Phyllobius (1PLLBG)	Quercus	1945	1968	1963	238					1968	1962		181	2	5	96	79
Phyllocolpa carnifrons	Phyllocolpa excavata		Animalia (1ANIMK)	Arthropoda (1ARTHP)	Hexapoda (1HEXAQ)	Insecta (1INSEC)		Hymenoptera (1HYMEO)		Tenthredinidae (1TENTF)			Salix	1968	1968	1964	239					1968	1963		182	2	5	97	79
Phyllocolpa leucapsis			Animalia (1ANIMK)	Arthropoda (1ARTHP)	Hexapoda (1HEXAQ)	Insecta (1INSEC)		Hymenoptera (1HYMEO)		Tenthredinidae (1TENTF)			Salix	1968	1968	1965	240					1968	1964		185	2	5	98	81
Phyllocolpa leucosticta			Animalia (1ANIMK)	Arthropoda (1ARTHP)	Hexapoda (1HEXAQ)	Insecta (1INSEC)		Hymenoptera (1HYMEO)		Tenthredinidae (1TENTF)			Salix	1968	1968	1966	241					1968	1965		187	2	5	99	82
Pontania bridgmannii			Animalia (1ANIMK)	Arthropoda (1ARTHP)	Hexapoda (1HEXAQ)	Insecta (1INSEC)		Hymenoptera (1HYMEO)		Tenthredinidae (1TENTF)		Pontania (1PONTG)	Salix	1945	1968	1967	242					1968	1966		188	2	5	99	83
Pontania pedunculi			Animalia (1ANIMK)	Arthropoda (1ARTHP)	Hexapoda (1HEXAQ)	Insecta (1INSEC)		Hymenoptera (1HYMEO)		Tenthredinidae (1TENTF)		Pontania (1PONTG)	Salix	1945	1968	1968	243					1968	1967		192	2	5	102	83
Pontania viminalis			Animalia (1ANIMK)	Arthropoda (1ARTHP)	Hexapoda (1HEXAQ)	Insecta (1INSEC)		Hymenoptera (1HYMEO)		Tenthredinidae (1TENTF)		Pontania (1PONTG)	Salix	1945	1968	1969	244					1968	1968		261	2	5	106	148
Pristiphora aphantoneura	Pristiphora fulvipes		Animalia (1ANIMK)	Arthropoda (1ARTHP)	Hexapoda (1HEXAQ)	Insecta (1INSEC)		Hymenoptera (1HYMEO)		Tenthredinidae (1TENTF)		Pristiphora (1PRISG)	Salix	1945	1968	1970	245					1968	1969		263	2	7	106	148
Pristiphora cincta	Pristiphora quercus		Animalia (1ANIMK)	Arthropoda (1ARTHP)	Hexapoda (1HEXAQ)	Insecta (1INSEC)		Hymenoptera (1HYMEO)		Tenthredinidae (1TENTF)		Pristiphora (1PRISG)	Betula, Vaccinium	1945	1968	1971	246					1968	1970		265	2	7	107	149
Pristiphora laricis			Animalia (1ANIMK)	Arthropoda (1ARTHP)	Hexapoda (1HEXAQ)	Insecta (1INSEC)		Hymenoptera (1HYMEO)		Tenthredinidae (1TENTF)		Pristiphora (1PRISG)	Larix	1945	1968	1972	247					1968	1971		269	2	8	110	149
Pristiphora wesmaeli			Animalia (1ANIMK)	Arthropoda (1ARTHP)	Hexapoda (1HEXAQ)	Insecta (1INSEC)		Hymenoptera (1HYMEO)		Tenthredinidae (1TENTF)		Pristiphora (1PRISG)	Larix	1945	1968	1973	248					1968	1972		272	2	8	113	149
Profenusa pygmaea			Animalia (1ANIMK)	Arthropoda (1ARTHP)	Hexapoda (1HEXAQ)	Insecta (1INSEC)		Hymenoptera (1HYMEO)		Tenthredinidae (1TENTF)			Quercus	1945	1968	1974	249					1968	1973		275	2	8	113	152
Pterocomma populeum			Animalia (1ANIMK)	Arthropoda (1ARTHP)	Hexapoda (1HEXAQ)	Insecta (1INSEC)		Hemiptera (1HEMIO)	Sternorrhyncha (1STERR)	Aphididae (1APHIF)		Pterocomma (1PTEOG)	Populus, Salix	1945	1968	1975	250					1968	1974		276	2	8	114	152
Rhogogaster viridis		Linnaeus, 1758	Animalia (1ANIMK)	Arthropoda (1ARTHP)	Hexapoda (1HEXAQ)	Insecta (1INSEC)		Hymenoptera (1HYMEO)		Tenthredinidae (1TENTF)		Rhogogaster (1RHGGG)	Alnus	1945	1968	1976	251					1968	1975		278	2	8	115	153
Rhynchaenus fagi	Orchestes fagi		Animalia (1ANIMK)	Arthropoda (1ARTHP)	Hexapoda (1HEXAQ)	Insecta (1INSEC)		Coleoptera (1COLEO)		Curculionidae (1CURCF)		Rhynchaenus (1RHYHG)		1945	1968	1977	252					1968	1976		280	2	8	116	154
Scolioneura betuleti			Animalia (1ANIMK)	Arthropoda (1ARTHP)	Hexapoda (1HEXAQ)	Insecta (1INSEC)		Hymenoptera (1HYMEO)		Tenthredinidae (1TENTF)			Betula	1945	1968	1978	253					1968	1977		281	2	8	117	154
Tenthredo ferruginea			Animalia (1ANIMK)	Arthropoda (1ARTHP)	Hexapoda (1HEXAQ)	Insecta (1INSEC)		Hymenoptera (1HYMEO)		Tenthredinidae (1TENTF)			Alnus, Salix	1945	1968	1979	254					1968	1978		284	2	8	120	154
Tenthredo livida			Animalia (1ANIMK)	Arthropoda (1ARTHP)	Hexapoda (1HEXAQ)	Insecta (1INSEC)		Hymenoptera (1HYMEO)		Tenthredinidae (1TENTF)			Salix	1945	1968	1980	255					1968	1979		290	3	8	120	159
Trichiosoma laterale	Trichiosoma latreillei	Leach, 1817	Animalia (1ANIMK)	Arthropoda (1ARTHP)	Hexapoda (1HEXAQ)	Insecta (1INSEC)		Hymenoptera (1HYMEO)		Cimbicidae			Betula, Salix	1945	1968	1981	256					1968	1980		294	3	8	122	161
Trichiosoma vitellinae			Animalia (1ANIMK)	Arthropoda (1ARTHP)	Hexapoda (1HEXAQ)	Insecta (1INSEC)		Hymenoptera (1HYMEO)		Cimbicidae			Salix	1945	1968	1982	257					1968	1981		298	3	8	122	165
Aureobasidium pullulans	Pullularia pullulans		Fungi (1FUNGK)	Ascomycota (1ASCOP)	Pezizomycotina (1PEZIQ)	Dothideomycetes (1DOTHC)	Dothideomycetidae (1DTHDL)	Dothideales (1DOTHO)		Saccotheciaceae (1SACTF)		Aureobasidium (1AUREG)	Pinus contorta	1944	1968	1983	258					1968	1982		302	3	8	123	168
Guignardia aesculi	Phyllosticta paviae		Fungi (1FUNGK)	Ascomycota (1ASCOP)	Pezizomycotina (1PEZIQ)	Dothideomycetes (1DOTHC)		Botryosphaeriales (1BOTSO)		Phyllostictaceae (1PHYCF)		Phyllosticta (1PHYSG)	Aesculus	1935	1968	1984	259					1968	1983		309	3	8	128	170
Marssonina kriegeriana	Marssonia kriegeriana	(Bres.) Magnus (1906);	Fungi (1FUNGK)	Ascomycota (1ASCOP)	Pezizomycotina (1PEZIQ)	Leotiomycetes (1LETOC)		Helotiales (1HELOO)					Salix	1937	1968	1985	260					1968	1984		312	3	8	129	172
Phaeotremella fagi	cryptococcus fagisuga; Tremella foliacea	(Middelhoven & Scorzetti) A.M. Yurkov & T. Boekhout	Fungi (1FUNGK)	Basidiomycota	Agaricomycotina	Tremellomycetes		Tremellales		Tremellaceae			Fagus sylvatica, Fraxinus excelsior	1835	1968	1986	261					1968	1985		312	3	8	129	172
Elongisporangium anandrum	Pythium anandrum		Chromista (1CHROK)	Pseudofungi (1PSDFP)		Oomycetes (1OOMYC)		Peronosporales (1PEROO)		Peronosporaceae (1PEROF)			Picea sitchensis	1974	1969	1987	262					1969	1986		315	4	8	131	172
Phytophthora cinnamomi		Rands 1922	Chromista (1CHROK)	Pseudofungi (1PSDFP)		Oomycetes (1OOMYC)		Peronosporales (1PEROO)		Peronosporaceae (1PEROF)		Phytophthora (1PHYTG)	Castanea, Cotoneaster, Erica, Berberis, Calluna, Pieris, Osmanthus, Ceanothus, Vinca, Rhododendron, Chamaecyparis lawsoniana, Juniperus, Cuppressus, Azalea, Erica	1934	1969	1988	263					1969	1987		316	4	8	131	173
Epinotia tedella			Animalia (1ANIMK)	Arthropoda (1ARTHP)	Hexapoda (1HEXAQ)	Insecta (1INSEC)		Lepidoptera (1LEPIO)		Tortricidae (1TORTF)		Epinotia (1EPING)		1869	1970	1989	264					1970	1988		316	4	8	131	173
Kabatina juniperi			Fungi (1FUNGK)	Ascomycota (1ASCOP)	Pezizomycotina (1PEZIQ)	Dothideomycetes (1DOTHC)	Dothideomycetidae (1DTHDL)	Dothideales (1DOTHO)		Dothioraceae (1DOTRF)		Kabatina (anamorphic genus) (1KABTG)	Cupressus macrocarpa, Cupressocyparis leylandii, Chamaecyparis lawsoniana	1970	1970	1990	265					1970	1989		316	4	8	131	173
Pythium oligandrum			Chromista (1CHROK)	Pseudofungi (1PSDFP)		Oomycetes (1OOMYC)		Pythiales (1PYTHO)		Pythiaceae (1PYTHF)		Pythium (1PYTHG)	Picea sitchensis	1938	1971	1991	266					1971	1990		317	4	8	131	174
Discella acerum	Diplodina acerum		Fungi (1FUNGK)	Ascomycota (1ASCOP)	Pezizomycotina (1PEZIQ)	Dothideomycetes (1DOTHC)	Dothideomycetidae (1DTHDL)	Capnodiales (1CAPDO)		Mycosphaerellaceae (1MYCOF)			Acer	1932	1971	1992	267					1971	1991		320	4	8	131	177
Seiridium cardinale	Coryneum cardinale	(W.W. Wagener) B. Sutton & I.A.S. Gibson	Fungi (1FUNGK)	Ascomycota (1ASCOP)	Pezizomycotina (1PEZIQ)	Sordariomycetes (1SORDC)	Xylariomycetidae (1XYLAL)	Amphisphaeriales (1AMPSO)		Amphisphaeriaceae (1AMPSF)		Seiridium (anamorphic genus) (1SEIRG)	Cupressus macrocarpa	1966	1971	1993	268					1971	1992		323	4	8	133	178
Tylospora fibrillosa	Tylosperma fibrillosum		Fungi (1FUNGK)	Basidiomycota	Agaricomycotina	Agaricomycetes	Agaricomycetidae	Atheliales		Atheliaceae			Picea sitchensis	1963	1971	1994	269					1971	1993		323	4	8	133	178
Didymascella chamaecyparidis	Keithia chamaecyparisii		Fungi (1FUNGK)	Ascomycota (1ASCOP)	Pezizomycotina (1PEZIQ)	Leotiomycetes (1LETOC)		Helotiales (1HELOO)		Hemiphacidiaceae (1HEMPF)		Didymascella (1DIDSG)	Chamaecyparis lawsoniana	1919	1972	1995	270					1972	1994		324	4	8	133	179
Ovulinia azaleae			Fungi (1FUNGK)	Ascomycota (1ASCOP)	Pezizomycotina (1PEZIQ)	Leotiomycetes (1LETOC)		Helotiales (1HELOO)		Sclerotiniaceae (1SCLEF)		Ovulinia (1OVULG)	Rhododendron	1970	1972	1996	271					1972	1995		328	4	9	134	181
Venturia saliciperda	Fusicladium saliciperdum	Nüesch,	Fungi (1FUNGK)	Ascomycota (1ASCOP)	Pezizomycotina (1PEZIQ)	Dothideomycetes (1DOTHC)	Pleosporomycetidae (1PLEOL)	Pleosporales (1PLEOO)		Venturiaceae (1VENTF)		Venturia (1VENTG)	Salix	1971	1972	1997	272					1972	1996		332	5	9	134	184
Cinara confinis			Animalia (1ANIMK)	Arthropoda (1ARTHP)	Hexapoda (1HEXAQ)	Insecta (1INSEC)		Hemiptera (1HEMIO)	Sternorrhyncha (1STERR)	Aphididae (1APHIF)		Cinara (1CINAG)	Abies	1972	1973	1998	273					1973	1997		332	5	9	134	184
Cinara pinea			Animalia (1ANIMK)	Arthropoda (1ARTHP)	Hexapoda (1HEXAQ)	Insecta (1INSEC)		Hemiptera (1HEMIO)	Sternorrhyncha (1STERR)	Aphididae (1APHIF)		Cinara (1CINAG)	Pinus	1948	1973	1999	274					1973	1998		332	5	9	134	184
Eulachnus brevipilosus			Animalia (1ANIMK)	Arthropoda (1ARTHP)	Hexapoda (1HEXAQ)	Insecta (1INSEC)		Hemiptera (1HEMIO)	Sternorrhyncha (1STERR)	Aphididae (1APHIF)		Eulachnus (1EULAG)	Pinus	1960	1973	2000	275					1973	1999		332	5	9	134	184
Gymnosporangium asiaticum	Gymnosporangium haraearum		Fungi (1FUNGK)	Basidiomycota (1BASIP)		Pucciniomycotina (1TELIC)	Pucciniomycetes (1PUCCL)	Pucciniales (1UREDO)		Pucciniaceae (1PUCCF)		Gymnosporangium (1GYMNG)	Juniperus	1974	1974	2001	276					1974	2000		337	5	9	136	187
Cinara pruinosa			Animalia (1ANIMK)	Arthropoda (1ARTHP)	Hexapoda (1HEXAQ)	Insecta (1INSEC)		Hemiptera (1HEMIO)	Sternorrhyncha (1STERR)	Aphididae (1APHIF)		Cinara (1CINAG)	Picea	1972	1975	2002	277					1975	2001		344	5	10	139	190
Macrophoma strobi	Diplodina strobi		Fungi (1FUNGK)	Ascomycota (1ASCOP)	Pezizomycotina (1PEZIQ)	Dothideomycetes (1DOTHC)		Botryosphaeriales (1BOTSO)		Botryosphaeriaceae (1BOTSF)			Pinus	1912	1975	2003	278					1975	2002		351	5	11	139	196
Hemichroa australis			Animalia (1ANIMK)	Arthropoda (1ARTHP)	Hexapoda (1HEXAQ)	Insecta (1INSEC)		Hymenoptera (1HYMEO)		Tenthredinidae (1TENTF)		Hemichroa (1HEMHG)	Alnus	1940	1976	2004	279					1976	2003		352	5	11	139	197
Rhabdocline pseudotsugae			Fungi (1FUNGK)	Ascomycota (1ASCOP)	Pezizomycotina (1PEZIQ)	Leotiomycetes (1LETOC)		Helotiales (1HELOO)		Hemiphacidiaceae (1HEMPF)		Rhabdocline (1RBDCG)	Pseudotsuga	1914	1976	2005	280					1976	2004		354	5	11	140	198
Ophiostoma novo-ulmi		Brasier (1991);	Fungi (1FUNGK)	Ascomycota (1ASCOP)	Pezizomycotina (1PEZIQ)	Sordariomycetes (1SORDC)	Sordariomycetidae (1SRDAL)	Ophiostomatales (1OPHIO)		Ophiostomataceae (1OPHIF)		Ophiostoma (1OPHSG)	Ulmus	1965	1977	2006	281					1977	2005		355	5	11	141	198
Melampsora amygdalinae			Fungi (1FUNGK)	Basidiomycota (1BASIP)		Pucciniomycotina (1TELIC)	Pucciniomycetes (1PUCCL)	Pucciniales (1UREDO)		Melampsoraceae (1MELMF)		Melampsora (1MELMG)	Salix	1966	1978	2007	282					1978	2006		361	5	11	141	204
Phyllosticta aquifolina			Fungi (1FUNGK)	Ascomycota (1ASCOP)	Pezizomycotina (1PEZIQ)	Dothideomycetes (1DOTHC)		Botryosphaeriales (1BOTSO)		Phyllostictaceae			Ilex	1935	1978	2008	283					1978	2007		362	5	11	141	205
Podosphaera clandestina	Podosphaera oxyacanthae; Podosphaera clandestina var. clandestina		Fungi (1FUNGK)	Ascomycota (1ASCOP)	Pezizomycotina (1PEZIQ)	Leotiomycetes (1LETOC)		Erysiphales (1ERYSO)		Erysiphaceae (1ERYSF)		Podosphaera (1PODOG)	Crataegus, Sorbus	1887	1978	2009	284					1978	2008		364	5	12	141	206
Cinara kochiana			Animalia (1ANIMK)	Arthropoda (1ARTHP)	Hexapoda (1HEXAQ)	Insecta (1INSEC)		Hemiptera (1HEMIO)	Sternorrhyncha (1STERR)	Aphididae (1APHIF)		Cinara (1CINAG)	Larix	1972	1979	2010	285					1979	2009		367	5	13	142	207
Lachnus roboris			Animalia (1ANIMK)	Arthropoda (1ARTHP)	Hexapoda (1HEXAQ)	Insecta (1INSEC)		Hemiptera (1HEMIO)	Sternorrhyncha (1STERR)	Aphididae (1APHIF)		Lachnus (1LACNG)	Quercus	1960	1979	2011	286					1979	2010		371	6	13	142	210
Parthenolecanium persicae			Animalia (1ANIMK)	Arthropoda (1ARTHP)	Hexapoda (1HEXAQ)	Insecta (1INSEC)		Hemiptera (1HEMIO)	Sternorrhyncha (1STERR)	Coccidae (1COCCF)		Parthenolecanium (1PRTLG)		1900	1979	2012	287					1979	2011		373	6	14	143	210
Dryocoetes affaber			Animalia (1ANIMK)	Arthropoda (1ARTHP)	Hexapoda (1HEXAQ)	Insecta (1INSEC)		Coleoptera (1COLEO)		Scolytidae (1SCOLF)		Dryocoetes (1DRYOG)		Absent	1979	2013	288					1979	2012		378	6	16	146	210
Xylotrechus colonus			Animalia (1ANIMK)	Arthropoda (1ARTHP)	Hexapoda (1HEXAQ)	Insecta (1INSEC)		Coleoptera (1COLEO)		Cerambycidae (1CERAF)		Xylotrechus (1XYLOG)			1979	2014	289					1979	2013		379	6	16	146	211
Pseudomonas syringae pv. Syringae			Bacteria (1BACTK)	Proteobacteria (1PROBP)		Gammaproteobacteria (1GAMBC)		Pseudomonadales (1PSDMO)		Pseudomonadaceae (1PSDMF)		Pseudomonas (1PSDMG)	Prunus, Aesculus	1951	1979	2015	290					1979	2014		382	6	17	146	213
Scolytus multistriatus			Animalia (1ANIMK)	Arthropoda (1ARTHP)	Hexapoda (1HEXAQ)	Insecta (1INSEC)		Coleoptera (1COLEO)		Scolytidae (1SCOLF)		Scolytus (1SCOLG)	Ulmus	1900	1980	2016	291					1980	2015		386	6	21	146	213
Dendroctonus rufipennis			Animalia (1ANIMK)	Arthropoda (1ARTHP)	Hexapoda (1HEXAQ)	Insecta (1INSEC)		Coleoptera (1COLEO)		Scolytidae (1SCOLF)		Dendroctonus (1DENCG)		Absent	1980	2017	292					1980	2016		393	10	21	148	214
Crumenulopsis sororia	Crumenula sororia	(P. Karst.) J.W. Groves	Fungi (1FUNGK)	Ascomycota (1ASCOP)	Pezizomycotina (1PEZIQ)	Leotiomycetes (1LETOC)		Helotiales (1HELOO)		Helotiaceae (1HELOF)		Crumenulopsis (1CRUMG)		1960	1980	2018	293					1980	2017		396	11	21	149	215
Lophodermium seditiosum		Minter, Staley & Millar (1978);	Fungi (1FUNGK)	Ascomycota (1ASCOP)	Pezizomycotina (1PEZIQ)	Leotiomycetes (1LETOC)		Rhytismatales (1RHYTO)		Rhytismataceae (1RHYTF)		Lophodermium (1LOPHG)	Pinus	1932	1980		294					1980	2018
Pristiphora abietina			Animalia (1ANIMK)	Arthropoda (1ARTHP)	Hexapoda (1HEXAQ)	Insecta (1INSEC)		Hymenoptera (1HYMEO)		Tenthredinidae (1TENTF)		Pristiphora (1PRISG)	Picea	1945	1981		295					1981
Dendroctonus brevicomis	Dendroctonus frontalis		Animalia (1ANIMK)	Arthropoda (1ARTHP)	Hexapoda (1HEXAQ)	Insecta (1INSEC)		Coleoptera (1COLEO)		Scolytidae (1SCOLF)		Dendroctonus (1DENCG)		1991	1981		296					1981
Monochamus scutellatus			Animalia (1ANIMK)	Arthropoda (1ARTHP)	Hexapoda (1HEXAQ)	Insecta (1INSEC)		Coleoptera (1COLEO)		Cerambycidae (1CERAF)		Monochamus (1MONCG)		Absent	1981		297					1981
Ips acuminatus			Animalia (1ANIMK)	Arthropoda (1ARTHP)	Hexapoda (1HEXAQ)	Insecta (1INSEC)		Coleoptera (1COLEO)		Scolytidae (1SCOLF)		Ips (1IPSXG)		1926	1981		298					1981
Megastigmus pinus			Animalia (1ANIMK)	Arthropoda (1ARTHP)	Hexapoda (1HEXAQ)	Insecta (1INSEC)		Hymenoptera (1HYMEO)		Torymidae (1TORYF)		Megastigmus (1MEGSG)		1945	1982		299					1982
Ips typographus			Animalia (1ANIMK)	Arthropoda (1ARTHP)	Hexapoda (1HEXAQ)	Insecta (1INSEC)		Coleoptera (1COLEO)		Scolytidae (1SCOLF)		Ips (1IPSXG)	Picea	1945	1982		300					1982
Sirex noctilio			Animalia (1ANIMK)	Arthropoda (1ARTHP)	Hexapoda (1HEXAQ)	Insecta (1INSEC)		Hymenoptera (1HYMEO)		Siricidae (1SIRIF)		Sirex (1SIRXG)		1945	1982		301					1982
Anisogramma virgultorum			Fungi (1FUNGK)	Ascomycota (1ASCOP)	Pezizomycotina (1PEZIQ)	Sordariomycetes (1SORDC)	Sordariomycetidae (1SRDAL)	Diaporthales (1DIAPO)		Valsaceae (1VALSF)		Anisogramma (1ANIGG)	Betula	1999	1982		302					1982
Saperda populnea	Odinia boletina		Animalia (1ANIMK)	Arthropoda (1ARTHP)	Hexapoda (1HEXAQ)	Insecta (1INSEC)		Coleoptera (1COLEO)		Cerambycidae (1CERAF)		Saperda (1SAPEG)		1945	1983		303					1983
Pityogenes quadridens			Animalia (1ANIMK)	Arthropoda (1ARTHP)	Hexapoda (1HEXAQ)	Insecta (1INSEC)		Coleoptera (1COLEO)		Scolytidae (1SCOLF)		Pityogenes (1PITYG)		1945	1983		304					1983
Chondroplea populea	Dothichiza populea; Cryptodiaporthe populea	(Sacc. & Briard) Kleb.,	Fungi (1FUNGK)	Ascomycota (1ASCOP)	Pezizomycotina (1PEZIQ)	Sordariomycetes (1SORDC)	Sordariomycetidae (1SRDAL)	Diaporthales (1DIAPO)		Gnomoniaceae (1GNOMF)		Cryptodiaporthe (rejected name) (1CRYDG)		1972	1983		305					1983
Chuppomyces handelii	Cercospora handelii; Pseudocercospora handelii		Fungi (1FUNGK)	Ascomycota (1ASCOP)	Pezizomycotina (1PEZIQ)	Dothideomycetes (1DOTHC)	Dothideomycetidae (1DTHDL)	Capnodiales (1CAPDO)					Rhododendron	1959	1983		306					1983
Colletotrichum gloeosporioides	Gloeosporium rhododendri; Glomerella cingulata		Fungi (1FUNGK)	Ascomycota (1ASCOP)	Pezizomycotina (1PEZIQ)	Sordariomycetes (1SORDC)	Sordariomycetidae (1SRDAL)	Phyllachorales (1PHYRO)		Glomerellaceae (1GLOMF)		Colletotrichum (1COLLG)	Rhododendron	1855	1983		307					1983
Lachnellula subtilissima	Naemaspora strobi	(Cooke) Dennis (1962);	Fungi (1FUNGK)	Ascomycota (1ASCOP)	Pezizomycotina (1PEZIQ)	Leotiomycetes (1LETOC)		Helotiales (1HELOO)		Hyaloscyphaceae (1HYASF)		Lachnellula (1LCHNG)		1880	1983		308					1983
Venturia populina			Fungi (1FUNGK)	Ascomycota (1ASCOP)	Pezizomycotina (1PEZIQ)	Dothideomycetes (1DOTHC)	Pleosporomycetidae (1PLEOL)	Pleosporales (1PLEOO)		Venturiaceae (1VENTF)		Venturia (1VENTG)	Populus	1973	1983		309					1983
Chionaspis pinifoliae	Phenacaspis pinifoliae; Hemichionapsis pinifoliae		Animalia (1ANIMK)	Arthropoda (1ARTHP)	Hexapoda (1HEXAQ)	Insecta (1INSEC)		Hemiptera (1HEMIO)	Sternorrhyncha (1STERR)	Diaspididae (1DIASF)		Chionaspis (1CHIOG)		1945	1984		310					1984
Cinara pinihabitans			Animalia (1ANIMK)	Arthropoda (1ARTHP)	Hexapoda (1HEXAQ)	Insecta (1INSEC)		Hemiptera (1HEMIO)	Sternorrhyncha (1STERR)	Aphididae (1APHIF)		Cinara (1CINAG)	Pinus	1972	1984		311					1984
Pucciniastrum epilobii		(Pers.) G.H. Otth (1861)	Fungi (1FUNGK)	Basidiomycota (1BASIP)		Pucciniomycotina (1TELIC)	Pucciniomycetes (1PUCCL)	Pucciniales (1UREDO)		Pucciniastraceae (1PUCIF)		Pucciniastrum (1PUCIG)		1866	1984		312					1984
Erwinia amylovora		(Burrill 1882) Winslow et al. 1920	Bacteria (1BACTK)	Proteobacteria (1PROBP)		Gammaproteobacteria (1GAMBC)		Enterobacterales (1ENTEO)		Erwiniaceae (1ERWIF)		Erwinia (1ERWIG)	Crataegus	1956	1986		313					1986
Calonectria morganii	Cylindrocladium scoparium	Crous, Alfenas & M.J. Wingf.	Fungi (1FUNGK)	Ascomycota (1ASCOP)	Pezizomycotina (1PEZIQ)	Sordariomycetes (1SORDC)	Hypocreomycetidae (1HYPRL)	Hypocreales (1HYPRO)		Nectriaceae (1NECTF)		Calonectria (1CALOG)	Abies	1955	1986		314					1986
Ganoderma australe		(Fr.) Pat. (1889);	Fungi (1FUNGK)	Basidiomycota (1BASIP)		Agaricomycotina (1BASIC)	Agaricomycetes (1AGARL)	Polyporales (1PORIO)		Ganodermataceae (1GANOF)		Ganoderma (1GANOG)		1913	1986		315					1986
Heterarthrus aceris		Kaltenbach, 1856	Animalia (1ANIMK)	Arthropoda (1ARTHP)	Hexapoda (1HEXAQ)	Insecta (1INSEC)		Hymenoptera (1HYMEO)		Tenthredinidae (1TENTF)		Heterarthrus (1HETAG)	Acer	1945	1987		316					1987
Silvanus bidentatus			Animalia (1ANIMK)	Arthropoda (1ARTHP)	Hexapoda (1HEXAQ)	Insecta (1INSEC)		Coleoptera (1COLEO)							1990		317					1990
Andriscus quercuscalis			Animalia (1ANIMK)							Cynipidae				1909	1991		318					1991
Chlorophorus signaticollis	Chlorophorus fainanensis		Animalia (1ANIMK)	Arthropoda (1ARTHP)	Hexapoda (1HEXAQ)	Insecta (1INSEC)		Coleoptera (1COLEO)		Cerambycidae (1CERAF)					1991		319					1991
Hylastes cunicularius			Animalia (1ANIMK)	Arthropoda (1ARTHP)	Hexapoda (1HEXAQ)	Insecta (1INSEC)		Coleoptera (1COLEO)		Scolytidae (1SCOLF)		Hylastes (1HYASG)		1917	1991		320					1991
cynips quercusfolii			Animalia (1ANIMK)	Arthropoda (1ARTHP)	Hexapoda (1HEXAQ)	Insecta (1INSEC)		Hymenoptera (1HYMEO)		Cynipidae (1CYNIF)		Cynips (1CYNIG)		1800	1992		321					1992
Lophodermella sulcigena	Hypodermium sulcigenum; Hypodermella sulcigena	(Link) Höhn.,	Fungi (1FUNGK)	Ascomycota (1ASCOP)	Pezizomycotina (1PEZIQ)	Leotiomycetes (1LETOC)		Rhytismatales (1RHYTO)		Rhytismataceae (1RHYTF)		Lophodermella (1LOPMG)		1967	1992		322					1992
Porodaedalea pini	Phellinus pini		Fungi (1FUNGK)	Basidiomycota (1BASIP)		Agaricomycotina (1BASIC)	Agaricomycetes (1AGARL)	Hymenochaetales (1HYMCO)		Hymenochaetaceae (1HYMCF)		Porodaedalea (1POROG)	Pinus	1900	1992		323					1992
Pulvinaria regalis			Animalia (1ANIMK)	Arthropoda (1ARTHP)	Hexapoda (1HEXAQ)	Insecta (1INSEC)		Hemiptera (1HEMIO)	Sternorrhyncha (1STERR)	Coccidae (1COCCF)		Pulvinaria (1PULVG)	Aesculus hippocastanum	1964	1994		324					1994
Ctenarytaina eucalypti	Rhinocola eucalypti		Animalia (1ANIMK)	Arthropoda (1ARTHP)	Hexapoda (1HEXAQ)	Insecta (1INSEC)		Hemiptera (1HEMIO)	Sternorrhyncha (1STERR)	Aphalaridae (1APHAF)		Ctenarytaina (1CTNRG)		1922	1995		325					1995
Paranthrene tabaniformis			Animalia (1ANIMK)	Arthropoda (1ARTHP)	Hexapoda (1HEXAQ)	Insecta (1INSEC)		Lepidoptera (1LEPIO)		Sesiidae (1SESIF)		Paranthrene (1PARHG)	Populus	1945	1995		326					1995
Phytophthora cambivora		(Petri) Buisman 1927	Chromista (1CHROK)	Pseudofungi (1PSDFP)		Oomycetes (1OOMYC)		Peronosporales (1PEROO)		Peronosporaceae (1PEROF)		Phytophthora (1PHYTG)	Castanea, Acer	1930	1995		327					1995
Discula destructiva		Redlin (1991)	Fungi (1FUNGK)	Ascomycota (1ASCOP)	Pezizomycotina (1PEZIQ)	Sordariomycetes (1SORDC)	Sordariomycetidae (1SRDAL)	Diaporthales (1DIAPO)		Valsaceae (1VALSF)		Discula (anamorphic genus) (1DISCG)		1933	1995		328					1995
Gypsonoma aceriana			Animalia (1ANIMK)	Arthropoda (1ARTHP)	Hexapoda (1HEXAQ)	Insecta (1INSEC)		Lepidoptera (1LEPIO)		Tortricidae (1TORTF)		Gypsonoma (1GYPSG)	Populus	1945	1996		329					1996
Pissodes castaneus	Pissodes notatus		Animalia (1ANIMK)	Arthropoda (1ARTHP)	Hexapoda (1HEXAQ)	Insecta (1INSEC)		Coleoptera (1COLEO)		Curculionidae (1CURCF)		Pissodes (1PISOG)		1945	1996		330					1996
Rhopalosiphum insertum			Animalia (1ANIMK)	Arthropoda (1ARTHP)	Hexapoda (1HEXAQ)	Insecta (1INSEC)		Hemiptera (1HEMIO)	Sternorrhyncha (1STERR)	Aphididae (1APHIF)		Rhopalosiphum (1RHOPG)			1996		331					1996
Xanthomonas populi	Aplanobacter populi	(ex Ridé, 1958) van den Mooter & Swings, 1990	Bacteria (1BACTK)	Proteobacteria (1PROBP)		Gammaproteobacteria (1GAMBC)		Lysobacterales (1LYSOO)		Lysobacteraceae (1LYSOF)		Xanthomonas (1XANTG)		1980	1996		332					1996
Cryptorhynchus rufescens			Animalia (1ANIMK)	Arthropoda (1ARTHP)	Hexapoda (1HEXAQ)	Insecta (1INSEC)		Coleoptera (1COLEO)		Curculionidae (1CURCF)		Cryptorhynchus (1CRYPG)		Absent	2000		333					2000
Monochamus alternatus			Animalia (1ANIMK)	Arthropoda (1ARTHP)	Hexapoda (1HEXAQ)	Insecta (1INSEC)		Coleoptera (1COLEO)		Cerambycidae (1CERAF)		Monochamus (1MONCG)		Absent	2000		334					2000
Niphades tubericollis			Animalia (1ANIMK)	Arthropoda (1ARTHP)	Hexapoda (1HEXAQ)	Insecta (1INSEC)								absent	2000		335					2000
Neolentinus lepideus	Lentinus lepideus		Fungi (1FUNGK)	Basidiomycota (1BASIP)		Agaricomycotina (1BASIC)	Agaricomycetes (1AGARL)	Polyporales (1PORIO)		Polyporaceae (1POLPF)		Neolentinus (1NLNTG)	Picea abies	1881	2000		336					2000
Valsa sordida		Nitschke (1870)	Fungi (1FUNGK)	Ascomycota (1ASCOP)	Pezizomycotina (1PEZIQ)	Sordariomycetes (1SORDC)	Sordariomycetidae (1SRDAL)	Diaporthales (1DIAPO)		Cytosporaceae (1CYTSF)		Cytospora (1CYTOG)		1918	2000		337					2000
Cinara cupressi			Animalia (1ANIMK)	Arthropoda (1ARTHP)	Hexapoda (1HEXAQ)	Insecta (1INSEC)		Hemiptera (1HEMIO)	Sternorrhyncha (1STERR)	Aphididae (1APHIF)		Cinara (1CINAG)		1985	2001		338					2001
Malacosoma neustria			Animalia (1ANIMK)	Arthropoda (1ARTHP)	Hexapoda (1HEXAQ)	Insecta (1INSEC)		Lepidoptera (1LEPIO)		Lasiocampidae (1LASIF)		Malacosoma (1MALAG)		1945	2001		339					2001
Taxomyia taxi			Animalia (1ANIMK)	Arthropoda (1ARTHP)	Hexapoda (1HEXAQ)	Insecta (1INSEC)		Diptera (1DIPTO)		Cecidomyiidae (1CECIF)		Taxomyia (1TAXMG)		1945	2001		340					2001
Phytophthora × multiformis	Phytophthora alni subsp. multiformis	(Brasier & S.A. Kirk) Husson, Ioos & Aguayo	Chromista (1CHROK)	Pseudofungi (1PSDFP)		Oomycetes (1OOMYC)		Peronosporales (1PEROO)		Peronosporaceae (1PEROF)		Phytophthora (1PHYTG)	Alnus	1993	2001		341					2001
Blumeriella jaapii			Fungi (1FUNGK)	Ascomycota (1ASCOP)	Pezizomycotina (1PEZIQ)	Leotiomycetes (1LETOC)		Helotiales (1HELOO)		Dermateaceae (1DERMF)		Blumeriella (1BLUMG)		1960	2001		342					2001
Monilinia johnsonii			Fungi (1FUNGK)	Ascomycota (1ASCOP)	Pezizomycotina (1PEZIQ)	Leotiomycetes (1LETOC)		Helotiales (1HELOO)		Sclerotiniaceae (1SCLEF)		Monilinia (1MONIG)		1937	2001		343					2001
Phomopsis oncostoma			Fungi (1FUNGK)	Ascomycota (1ASCOP)	Pezizomycotina (1PEZIQ)	Sordariomycetes (1SORDC)	Sordariomycetidae (1SRDAL)	Diaporthales (1DIAPO)						1940	2001		344					2001
Nicrophorus vespillo			Animalia (1ANIMK)	Arthropoda (1ARTHP)	Hexapoda (1HEXAQ)	Insecta (1INSEC)		Coleoptera (1COLEO)						1907	2002		345					2002
Otiorhynchus sulcatus			Animalia (1ANIMK)	Arthropoda (1ARTHP)	Hexapoda (1HEXAQ)	Insecta (1INSEC)		Coleoptera (1COLEO)		Curculionidae (1CURCF)		Otiorhynchus (1OTIOG)		1945	2002		346					2002
Phyllobius glaucus			Animalia (1ANIMK)	Arthropoda (1ARTHP)	Hexapoda (1HEXAQ)	Insecta (1INSEC)		Coleoptera (1COLEO)		Curculionidae (1CURCF)		Phyllobius (1PLLBG)			2002		347					2002
Rhagium bifasciatum			Animalia (1ANIMK)	Arthropoda (1ARTHP)	Hexapoda (1HEXAQ)	Insecta (1INSEC)		Coleoptera (1COLEO)		Cerambycidae (1CERAF)		Rhagium (1RHAIG)		1945	2002		348					2002
Rhagonycha lignosa			Animalia (1ANIMK)	Arthropoda (1ARTHP)	Hexapoda (1HEXAQ)	Insecta (1INSEC)		Coleoptera (1COLEO)						1945	2002		349					2002
Trypodendron lineatum			Animalia (1ANIMK)	Arthropoda (1ARTHP)	Hexapoda (1HEXAQ)	Insecta (1INSEC)		Coleoptera (1COLEO)		Scolytidae (1SCOLF)		Trypodendron (1TRYDG)		1945	2002		350					2002
Phytophthora ramorum		Werres, De Cock & Man in 't Veld 2001	Chromista (1CHROK)	Pseudofungi (1PSDFP)		Oomycetes (1OOMYC)		Peronosporales (1PEROO)		Peronosporaceae (1PEROF)		Phytophthora (1PHYTG)	Quercus	2002	2002		351					2002
Argyresthia cupressella			Animalia (1ANIMK)	Arthropoda (1ARTHP)	Hexapoda (1HEXAQ)	Insecta (1INSEC)		Lepidoptera (1LEPIO)		Yponomeutidae (1YPONF)		Argyresthia (1ARGYG)		1998	2003		352					2003
Lymantria dispar			Animalia (1ANIMK)	Arthropoda (1ARTHP)	Hexapoda (1HEXAQ)	Insecta (1INSEC)		Lepidoptera (1LEPIO)		Erebidae (1EREBF)		Lymantria (1LYMAG)	Broadleaf	1995	2004		353					2004
Cryptostroma corticale		(Ellis & Everh.) P.H. Greg. & S. Waller (1952	Fungi (1FUNGK)	Ascomycota (1ASCOP)	Pezizomycotina (1PEZIQ)							Cryptostroma (anamorphic genus) (1CRPSG)	Acer	1945	2004		354					2004
Cryptodiaporthe populea			Fungi (1FUNGK)	Ascomycota (1ASCOP)	Pezizomycotina (1PEZIQ)	Sordariomycetes (1SORDC)	Sordariomycetidae (1SRDAL)	Diaporthales (1DIAPO)		Gnomoniaceae (1GNOMF)		Cryptodiaporthe (rejected name) (1CRYDG)	Populus	1923	2005		355					2005
Dioryctria abietella			Animalia (1ANIMK)	Arthropoda (1ARTHP)	Hexapoda (1HEXAQ)	Insecta (1INSEC)		Lepidoptera (1LEPIO)		Pyralidae (1PYRAF)		Dioryctria (1DIORG)	Pinus	1945	2006		356					2006
Epinotia nanana			Animalia (1ANIMK)	Arthropoda (1ARTHP)	Hexapoda (1HEXAQ)	Insecta (1INSEC)		Lepidoptera (1LEPIO)		Tortricidae (1TORTF)		Epinotia (1EPING)	Picea	1874	2006		357					2006
Epirrita autumnata			Animalia (1ANIMK)	Arthropoda (1ARTHP)	Hexapoda (1HEXAQ)	Insecta (1INSEC)		Lepidoptera (1LEPIO)		Geometridae (1GEOMF)			Pinus, Betula	1970	2006		358					2006
Lymantria monacha			Animalia (1ANIMK)	Arthropoda (1ARTHP)	Hexapoda (1HEXAQ)	Insecta (1INSEC)		Lepidoptera (1LEPIO)		Erebidae (1EREBF)		Lymantria (1LYMAG)		1984	2006		359					2006
Pissodes pini			Animalia (1ANIMK)	Arthropoda (1ARTHP)	Hexapoda (1HEXAQ)	Insecta (1INSEC)		Coleoptera (1COLEO)		Curculionidae (1CURCF)		Pissodes (1PISOG)		1918	2006		360					2006
Yponomeuta evonymella			Animalia (1ANIMK)	Arthropoda (1ARTHP)	Hexapoda (1HEXAQ)	Insecta (1INSEC)		Lepidoptera (1LEPIO)		Yponomeutidae (1YPONF)		Yponomeuta (1HYPNG)		1945	2006		361					2006
Paropsisterna selmani			Animalia (1ANIMK)	Arthropoda (1ARTHP)	Hexapoda (1HEXAQ)	Insecta (1INSEC)		Coleoptera (1COLEO)		Chrysomelidae (1CHRYF)		Paropsisterna (1PSISG)	Eucalyptus	2015	2007		362					2007
Pristiphora testacea			Animalia (1ANIMK)	Arthropoda (1ARTHP)	Hexapoda (1HEXAQ)	Insecta (1INSEC)		Hymenoptera (1HYMEO)		Tenthredinidae (1TENTF)		Pristiphora (1PRISG)		1945	2008		363					2008
Phytophthora kernoviae		Brasier, Beales & S.A. Kirk 2005	Chromista (1CHROK)	Pseudofungi (1PSDFP)		Oomycetes (1OOMYC)		Peronosporales (1PEROO)		Peronosporaceae (1PEROF)		Phytophthora (1PHYTG)		2003	2008		364					2008
Pityophagus ferrugineus			Animalia (1ANIMK)	Arthropoda (1ARTHP)	Hexapoda (1HEXAQ)	Insecta (1INSEC)		Coleoptera (1COLEO)						1945	2009		365					2009
Phytophthora plurivora			Chromista (1CHROK)	Pseudofungi (1PSDFP)		Oomycetes (1OOMYC)		Peronosporales (1PEROO)		Peronosporaceae (1PEROF)		Phytophthora (1PHYTG)		1937	2009		366					2009
Cylindrocladium buxicola		Henricot (2002);	Fungi (1FUNGK)	Ascomycota (1ASCOP)	Pezizomycotina (1PEZIQ)	Sordariomycetes (1SORDC)	Hypocreomycetidae (1HYPRL)	Hypocreales (1HYPRO)		Nectriaceae (1NECTF)		Cylindrocladium (anamorphic genus) (1CYLDG)	Buxus	1994	2009		367					2009
Arnoldiola quercus			Animalia (1ANIMK)	Arthropoda (1ARTHP)	Hexapoda (1HEXAQ)	Insecta (1INSEC)		Diptera (1DIPTO)		Cecidomyiidae (1CECIF)		Arnoldiola (1ARNLG)		1945	2010		368					2010
Epinotia pygmaeana			Animalia (1ANIMK)	Arthropoda (1ARTHP)	Hexapoda (1HEXAQ)	Insecta (1INSEC)		Lepidoptera (1LEPIO)		Tortricidae (1TORTF)		Epinotia (1EPING)		1890	2010		369					2010
Leptoglossus occidentalis			Animalia (1ANIMK)	Arthropoda (1ARTHP)	Hexapoda (1HEXAQ)	Insecta (1INSEC)		Hemiptera (1HEMIO)	Heteroptera (1HETER)	Coreidae (1COREF)		Leptoglossus (1LEPLG)	Conifers	2008	2010		370					2010
Pseudomonas syringae pv. Aesculi			Bacteria (1BACTK)	Proteobacteria (1PROBP)		Gammaproteobacteria (1GAMBC)		Pseudomonadales (1PSDMO)		Pseudomonadaceae (1PSDMF)		Pseudomonas (1PSDMG)		2001	2010		371					2010
Phytophthora lateralis		Tucker & Milbrath 1942	Chromista (1CHROK)	Pseudofungi (1PSDFP)		Oomycetes (1OOMYC)		Peronosporales (1PEROO)		Peronosporaceae (1PEROF)		Phytophthora (1PHYTG)	Chamaecyparis	2010	2011		372					2011
Gremmeniella abietina	Crumenula pinea, Scleroderris lagerbergii, Brunchorista destructans	(Lagerberg) Morelet	Fungi (1FUNGK)	Ascomycota (1ASCOP)	Pezizomycotina (1PEZIQ)	Leotiomycetes (1LETOC)		Helotiales (1HELOO)		Helotiaceae (1HELOF)		Gremmeniella (1GREMG)		1926	2011		373					2011
Phytophthora hibernalis		Carne 1925	Chromista (1CHROK)	Pseudofungi (1PSDFP)		Oomycetes (1OOMYC)		Peronosporales (1PEROO)		Peronosporaceae (1PEROF)		Phytophthora (1PHYTG)	Chamaecyparis	1975	2012		374					2012
Phytophthora pseudosyringae		T. Jung & Delatour	Chromista (1CHROK)	Pseudofungi (1PSDFP)		Oomycetes (1OOMYC)		Peronosporales (1PEROO)		Peronosporaceae (1PEROF)		Phytophthora (1PHYTG)	Fagus, Nothofagus	1938	2012		375					2012
Cristulariella depraedans			Fungi (1FUNGK)	Ascomycota (1ASCOP)	Pezizomycotina (1PEZIQ)	Leotiomycetes (1LETOC)		Helotiales (1HELOO)		Sclerotiniaceae (1SCLEF)		Cristulariella (anamorphic genus) (1CRISG)	Acer	1879	2012		376					2012
Dothistroma septosporum	Mycosphaerella pini		Fungi (1FUNGK)	Ascomycota (1ASCOP)	Pezizomycotina (1PEZIQ)	Dothideomycetes (1DOTHC)	Dothideomycetidae (1DTHDL)	Capnodiales (1CAPDO)		Mycosphaerellaceae (1MYCOF)		Dothistroma (anamorphic genus) (1DOTSG)	Pinus	1953	2012		377					2012
Hymenoscyphus fraxineus	Chalara fraxinea		Fungi (1FUNGK)	Ascomycota (1ASCOP)	Pezizomycotina (1PEZIQ)	Leotiomycetes (1LETOC)		Helotiales (1HELOO)		Helotiaceae (1HELOF)		Hymenoscyphus (1HMSCG)	Fraxinus	2012	2012		378					2012
Cameraria ohridella			Animalia (1ANIMK)	Arthropoda (1ARTHP)	Hexapoda (1HEXAQ)	Insecta (1INSEC)		Lepidoptera (1LEPIO)		Gracillariidae (1GRACF)		Cameraria (1CAMEG)	Aesculus	2002	2013		379					2013
Caliroa varipes			Animalia (1ANIMK)	Arthropoda (1ARTHP)	Hexapoda (1HEXAQ)	Insecta (1INSEC)		Hymenoptera (1HYMEO)		Tenthredinidae (1TENTF)		Caliroa (1KALIG)		2014	2014		380					2014
Sirex torvus			Animalia (1ANIMK)	Arthropoda (1ARTHP)	Hexapoda (1HEXAQ)	Insecta (1INSEC)		Hymenoptera (1HYMEO)		Siricidae (1SIRIF)		Sirex (1SIRXG)		2014	2014		381					2014
Phytophthora gonapodyides		(H.E. Petersen) Buisman 1927	Chromista (1CHROK)	Pseudofungi (1PSDFP)		Oomycetes (1OOMYC)		Peronosporales (1PEROO)		Peronosporaceae (1PEROF)		Phytophthora (1PHYTG)	Fagus	1932	2014		382					2014
Phytophthora × alni	Phytophthora alni subsp. alni	(Brasier & S.A. Kirk) Husson, Ioos & Aguayo	Chromista (1CHROK)	Pseudofungi (1PSDFP)		Oomycetes (1OOMYC)		Peronosporales (1PEROO)		Peronosporaceae (1PEROF)		Phytophthora (1PHYTG)	Alnus	1993	2015		383					2015
Phytophthora chlamydospora			Chromista (1CHROK)	Pseudofungi (1PSDFP)		Oomycetes (1OOMYC)		Peronosporales (1PEROO)		Peronosporaceae (1PEROF)		Phytophthora (1PHYTG)	Rhododendron	1971	2015		384					2015
Phytophthora lacustris			Chromista (1CHROK)	Pseudofungi (1PSDFP)		Oomycetes (1OOMYC)		Peronosporales (1PEROO)		Peronosporaceae (1PEROF)		Phytophthora (1PHYTG)		1972	2015		385					2015
Phytophthora uniformis	Phytophthora alni subsp. uniformis		Chromista (1CHROK)	Pseudofungi (1PSDFP)		Oomycetes (1OOMYC)		Peronosporales (1PEROO)		Peronosporaceae (1PEROF)		Phytophthora (1PHYTG)	Alnus	1993	2015		386					2015
Tomostethus nigritus			Animalia (1ANIMK)	Arthropoda (1ARTHP)	Hexapoda (1HEXAQ)	Insecta (1INSEC)		Hymenoptera (1HYMEO)		Tenthredinidae (1TENTF)		Tomostethus (1TOMOG)	Fraxinus	1876	2016		387					2016
Brenneria nigrifluens			Bacteria (1BACTK)	Proteobacteria (1PROBP)		Gammaproteobacteria (1GAMBC)		Enterobacterales (1ENTEO)		Pectobacteriaceae (1PECTF)		Brenneria (1BRNNG)	Aesculus	2012	2016		388					2016
Erwinia billingiae			Bacteria (1BACTK)	Proteobacteria (1PROBP)		Gammaproteobacteria (1GAMBC)		Enterobacterales (1ENTEO)		Erwiniaceae (1ERWIF)		Erwinia (1ERWIG)	Aesculus	1958	2016		389					2016
Erwinia toletana			Bacteria (1BACTK)	Proteobacteria (1PROBP)		Gammaproteobacteria (1GAMBC)		Enterobacterales (1ENTEO)		Erwiniaceae (1ERWIF)		Erwinia (1ERWIG)	Aesculus	Absent	2016		390					2016
Raoultella terrigena			Bacteria (1BACTK)										Aesculus		2016		391					2016
Lecanosticta acicola			Fungi (1FUNGK)	Ascomycota (1ASCOP)	Pezizomycotina (1PEZIQ)	Dothideomycetes (1DOTHC)	Dothideomycetidae (1DTHDL)	Capnodiales (1CAPDO)		Mycosphaerellaceae (1MYCOF)		Lecanosticta (anamorphic genus) (1LCSTG)		1994	2016		392					2016
Sirococcus tsugae			Fungi (1FUNGK)	Ascomycota (1ASCOP)	Pezizomycotina (1PEZIQ)	Sordariomycetes (1SORDC)	Sordariomycetidae (1SRDAL)	Diaporthales (1DIAPO)				Sirococcus (anamorphic genus) (1SIROG)	Cedrus	2004	2016		393					2016
Monochamus sutor			Animalia (1ANIMK)	Arthropoda (1ARTHP)	Hexapoda (1HEXAQ)	Insecta (1INSEC)		Coleoptera (1COLEO)		Cerambycidae (1CERAF)		Monochamus (1MONCG)		1945	2017		394					2017
Erwinia rhapontici			Bacteria (1BACTK)	Proteobacteria (1PROBP)		Gammaproteobacteria (1GAMBC)		Enterobacterales (1ENTEO)		Erwiniaceae (1ERWIF)		Erwinia (1ERWIG)	Quercus	1981	2017		395					2017
Neonectria fuckeliana	Nectria canker, Spruce canker		Fungi (1FUNGK)	Ascomycota (1ASCOP)	Pezizomycotina (1PEZIQ)	Sordariomycetes (1SORDC)	Hypocreomycetidae (1HYPRL)	Hypocreales (1HYPRO)		Nectriaceae (1NECTF)		Corinectria (1CRNCG)	Picea sitchensis	1924	2017		396					2017

## Sheet: Figure 2
Figure
